# Supplementary material for: Synthesis of alkynamides through reaction of alkyl- or aryl-substituted alkynylaluminums with isocyanates
Source: Royal Society of Chemistry journal article supplement (doi:10.1039/d1ob01990b), 2021-12-02
Supplement: d1ob01990b1.pdf [file d1ob01990b1.pdf]

# Synthesis of Alkynamides through Reaction of Alkyl- or Aryl-Substituted Alkynylaluminums with Isocyanates

Soohong Cho,<sup>‡a</sup> Yeonjoo Lee,<sup>‡b</sup> Kyeongmin Lee,<sup>a</sup> Hwiwoong Lee<sup>a</sup>,

Yunmi Lee<sup>\*a</sup> and Byunghyuck Jung<sup>\*b</sup>

<sup>a</sup>Department of Chemistry, Kwangwoon University, Seoul 01897, Republic of Korea

<sup>b</sup>Department of Emerging Materials Science, DGIST, Daegu 42988, Republic of Korea

## Supplementary Information

### Table of Contents

|                                                                                                |    |
|------------------------------------------------------------------------------------------------|----|
| 1. Copies of <sup>1</sup> H, <sup>13</sup> C, and <sup>19</sup> F NMR spectra for all products | S2 |
|------------------------------------------------------------------------------------------------|----|

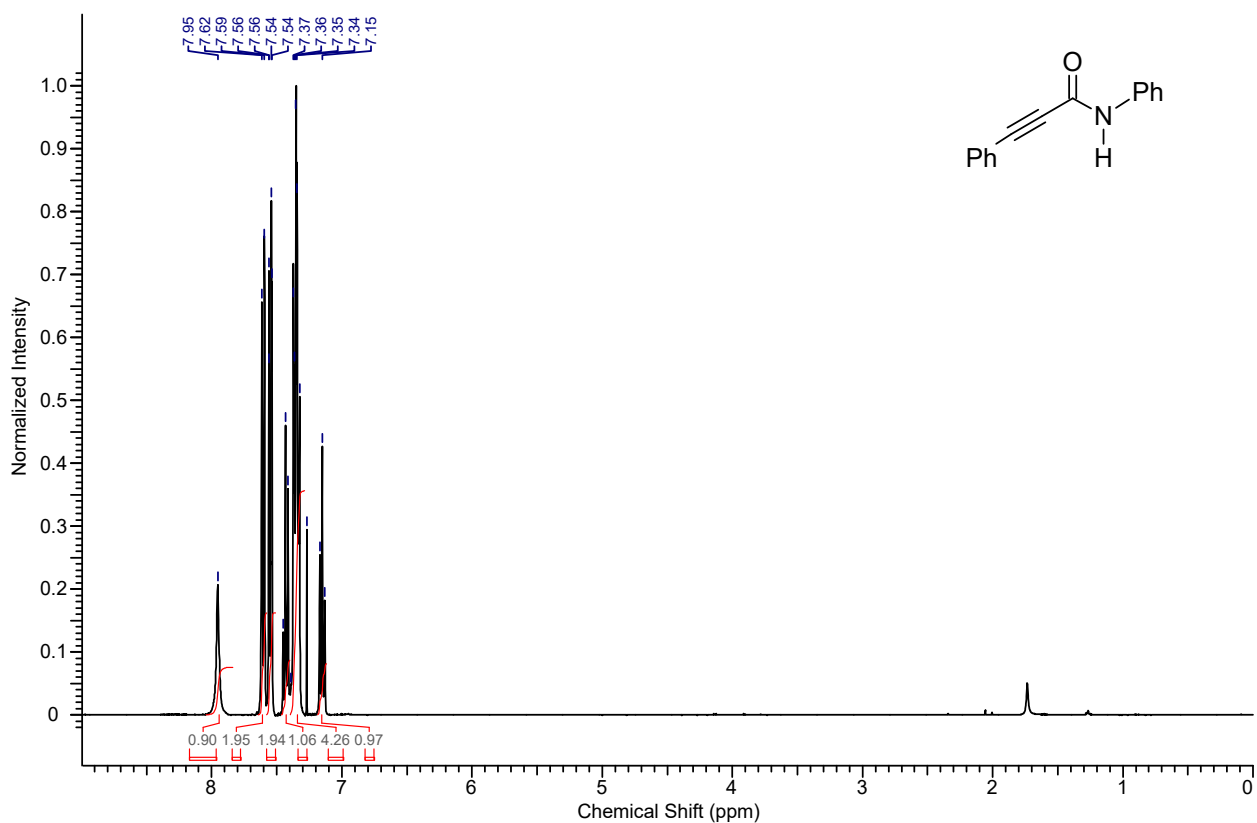

<sup>1</sup>H NMR spectrum of the compound 4aa

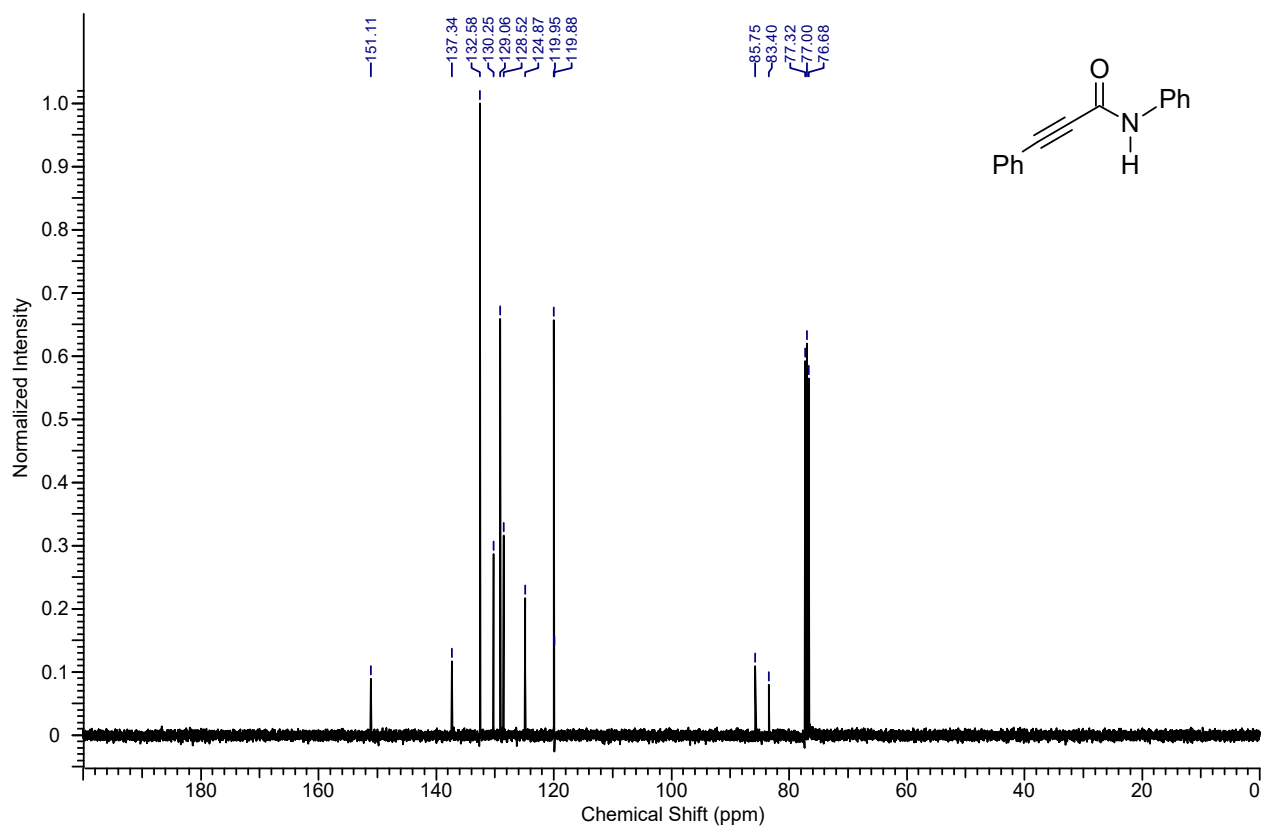

<sup>13</sup>C NMR spectrum of the compound 4aa

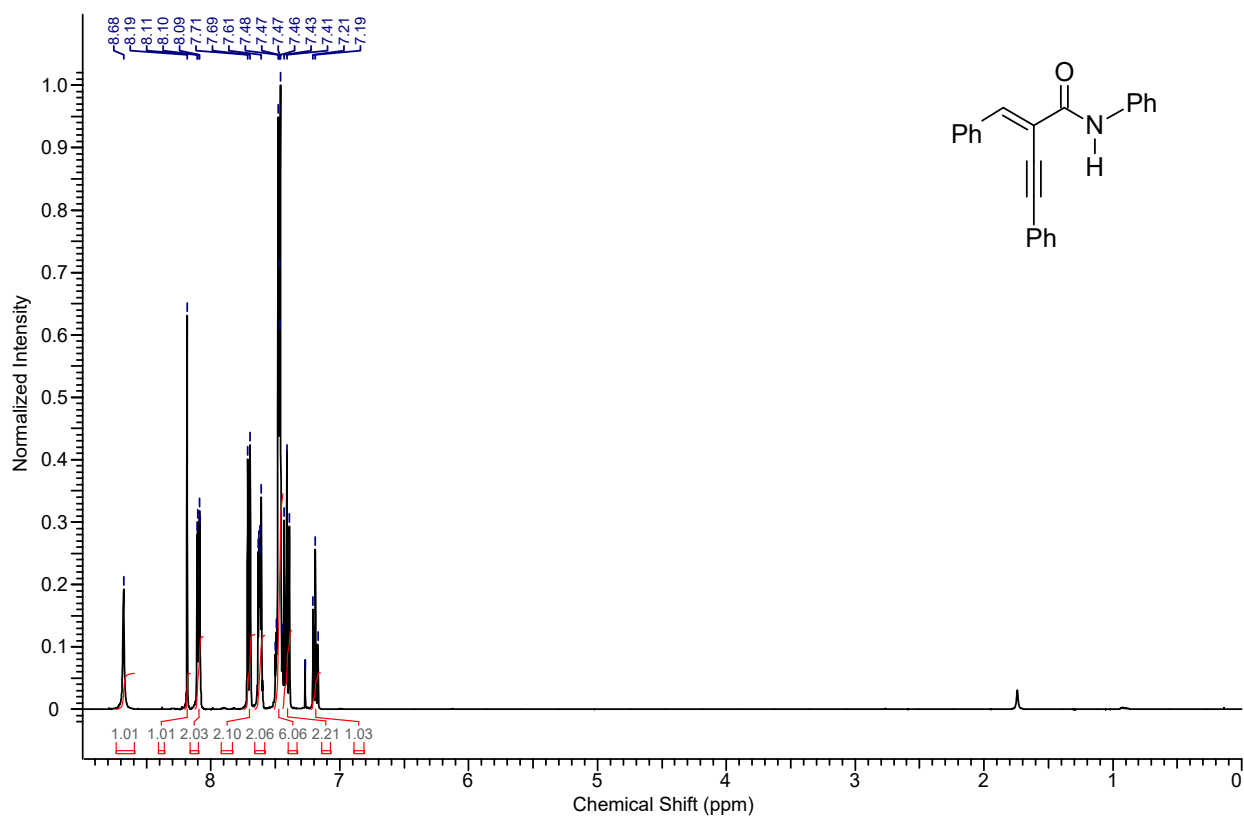

<sup>1</sup>H NMR spectrum of the compound **5aa**

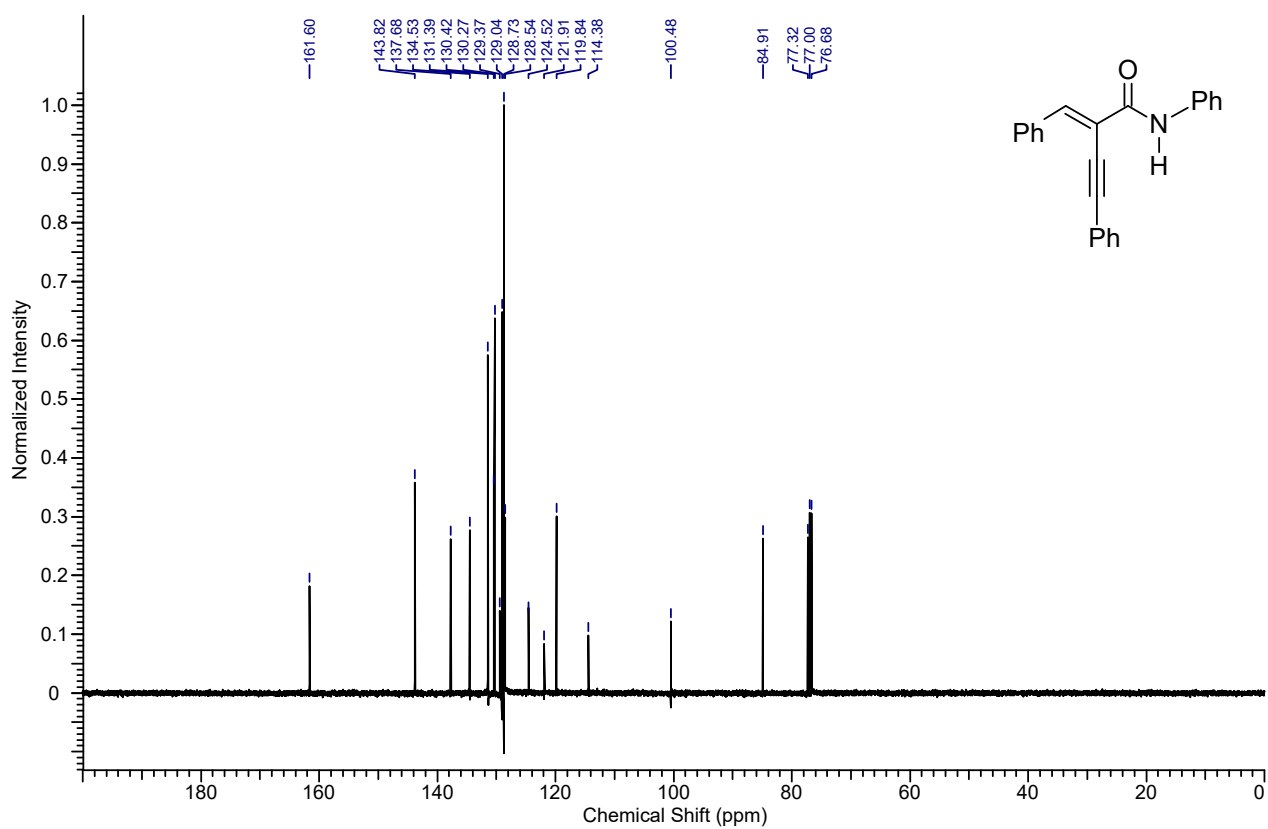

<sup>13</sup>C NMR spectrum of the compound **5aa**

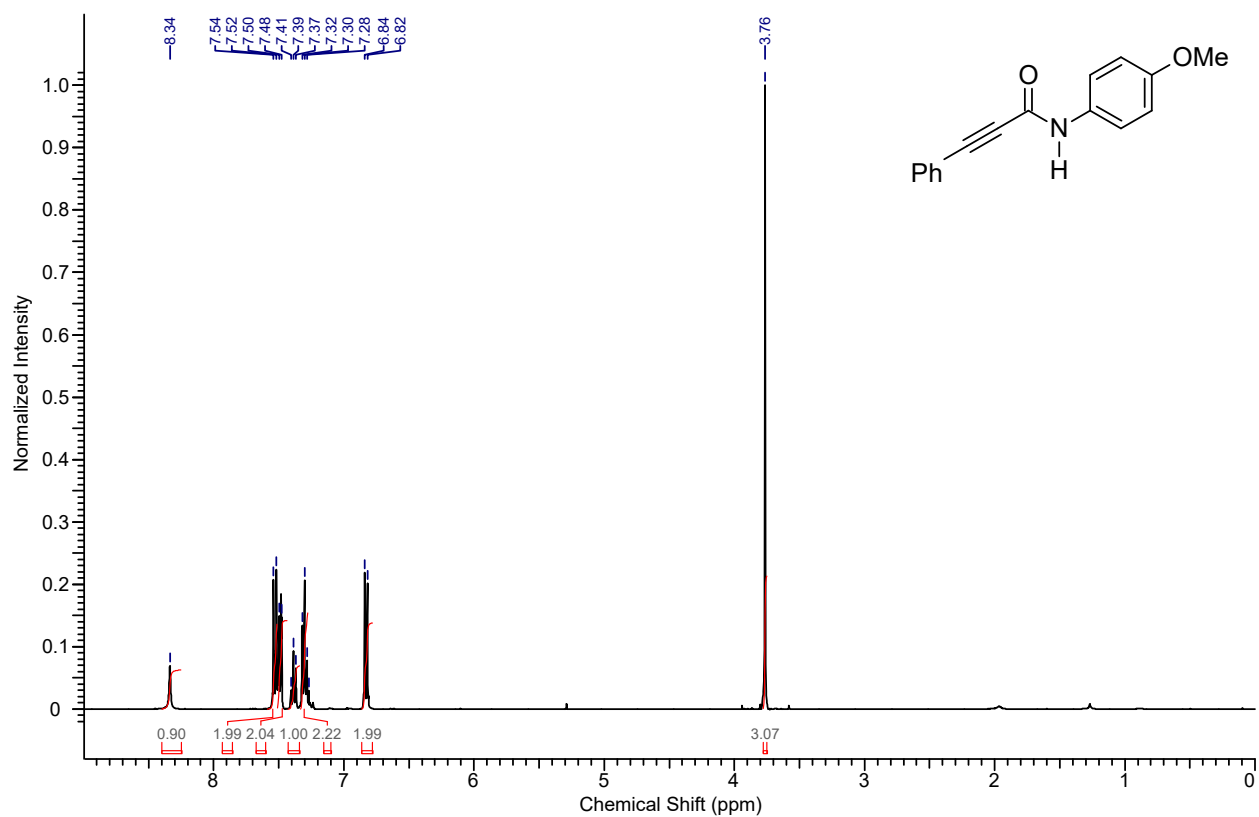

**<sup>1</sup>H NMR spectrum of the compound 4ab**

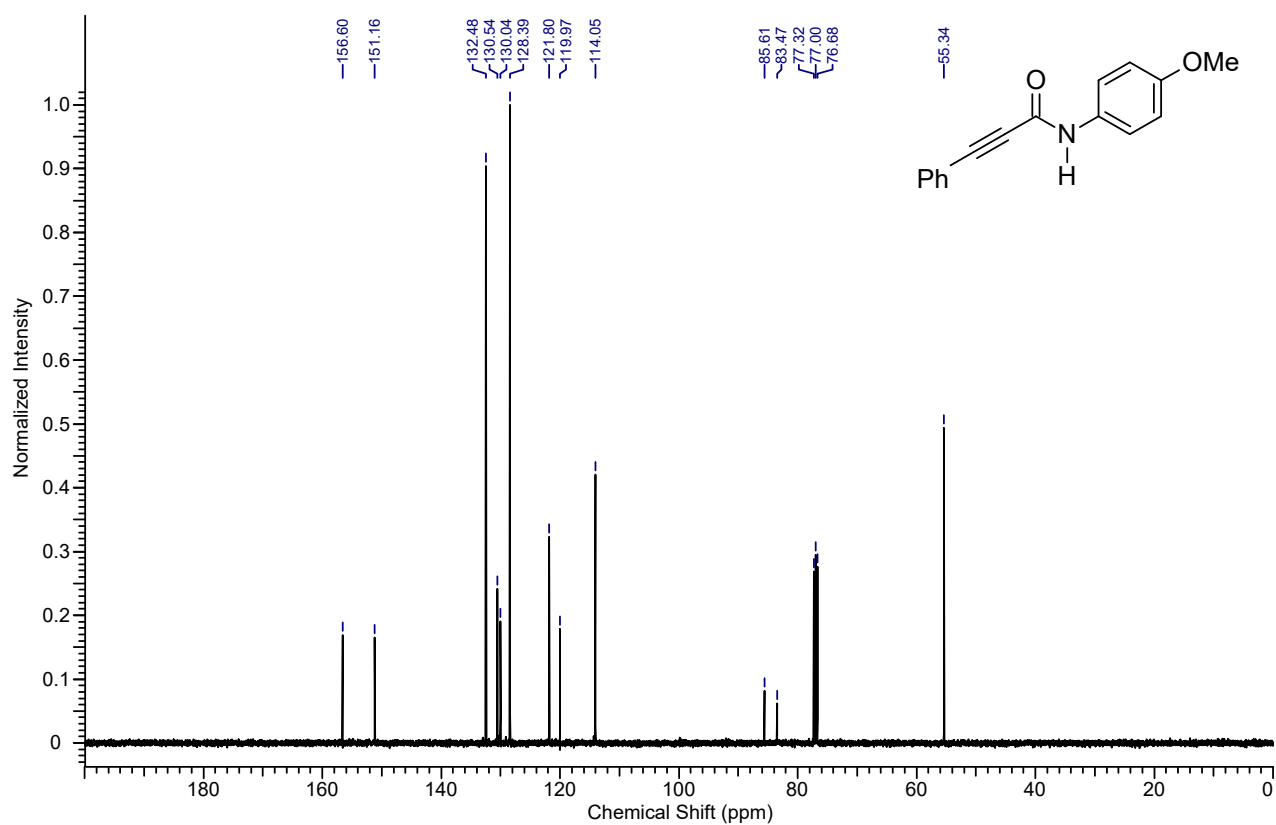

**<sup>13</sup>C NMR spectrum of the compound 4ab**

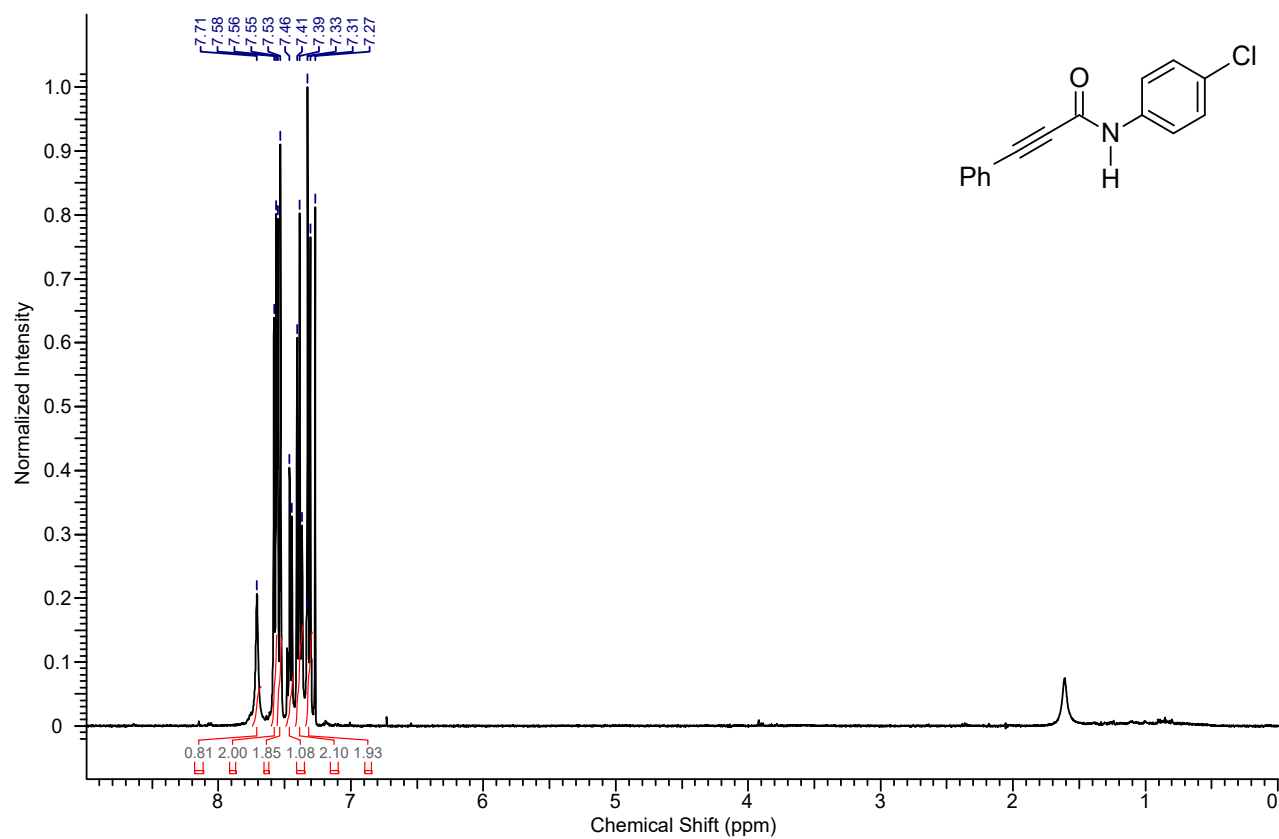

<sup>1</sup>H NMR spectrum of the compound **4ac**

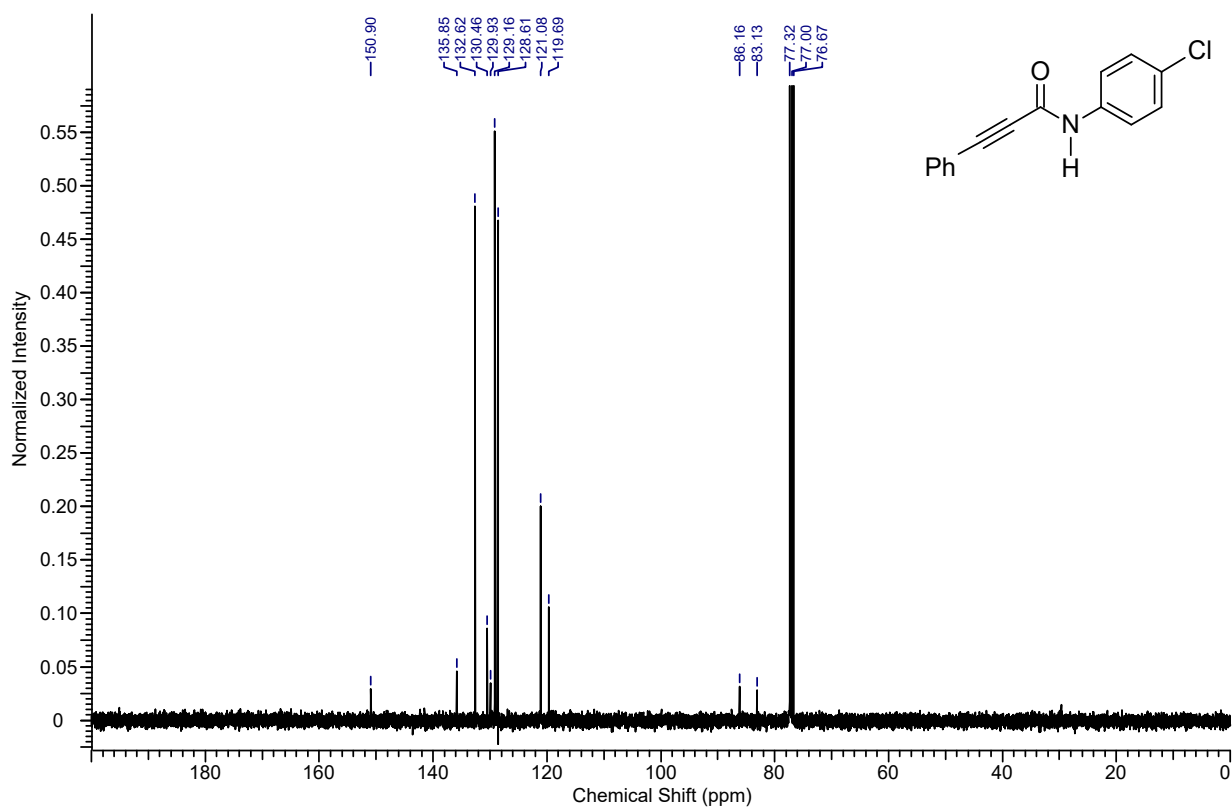

<sup>13</sup>C NMR spectrum of the compound **4ac**

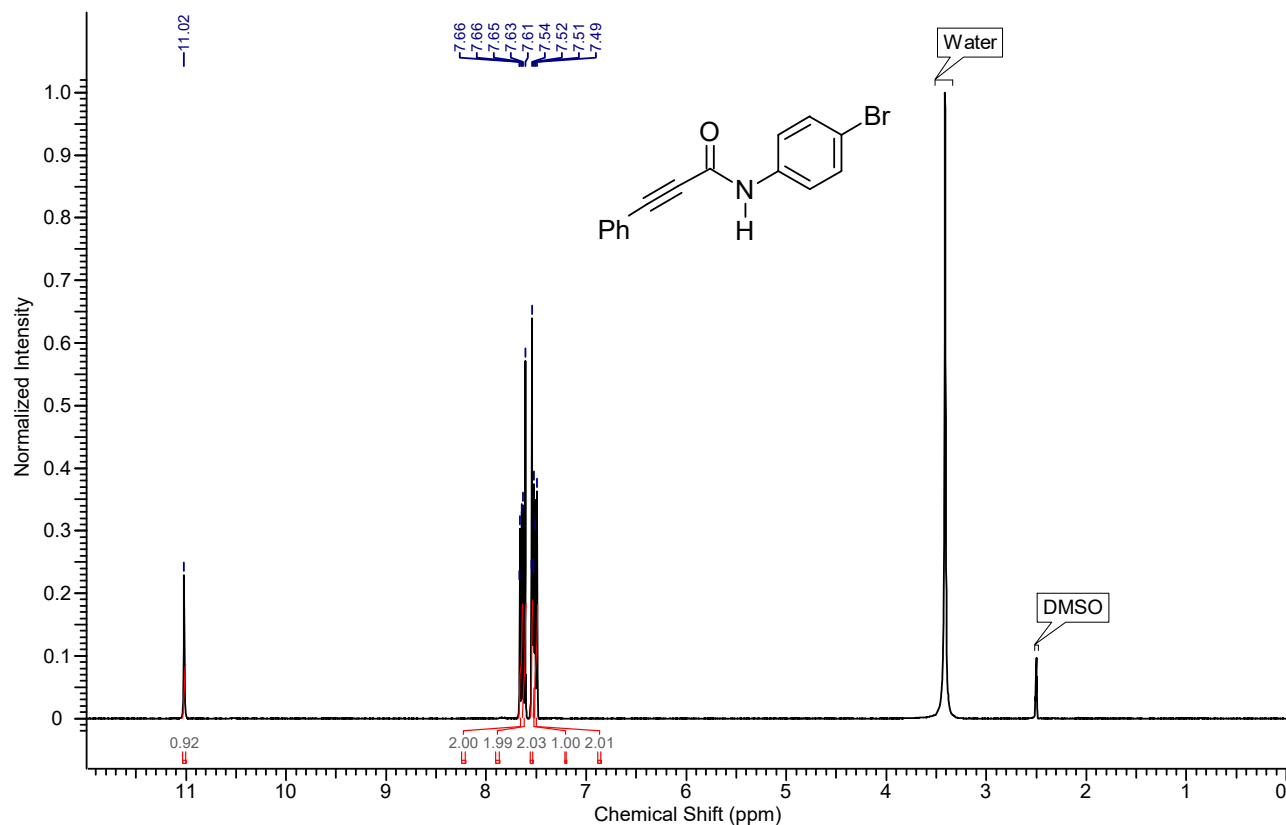

<sup>1</sup>H NMR spectrum of the compound **4ad**

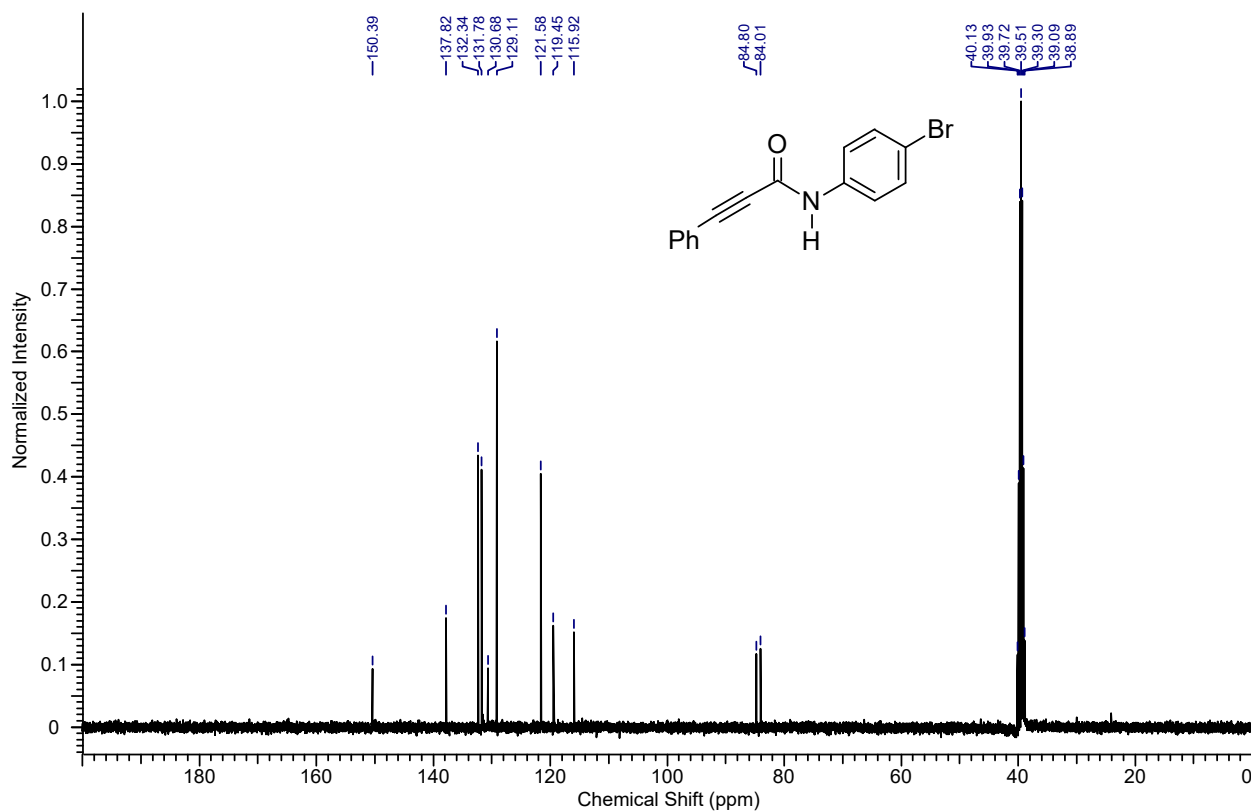

<sup>13</sup>C NMR spectrum of the compound **4ad**

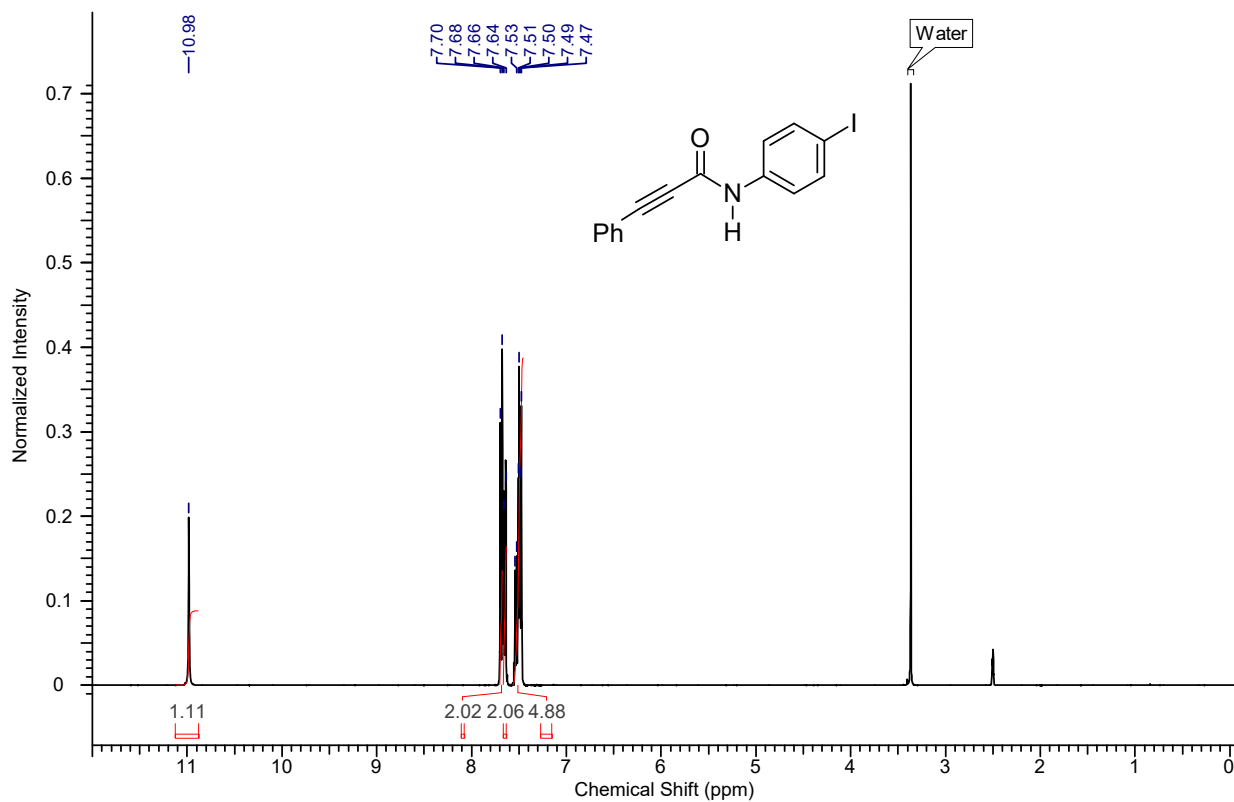

<sup>1</sup>H NMR spectrum of the compound **4ae**

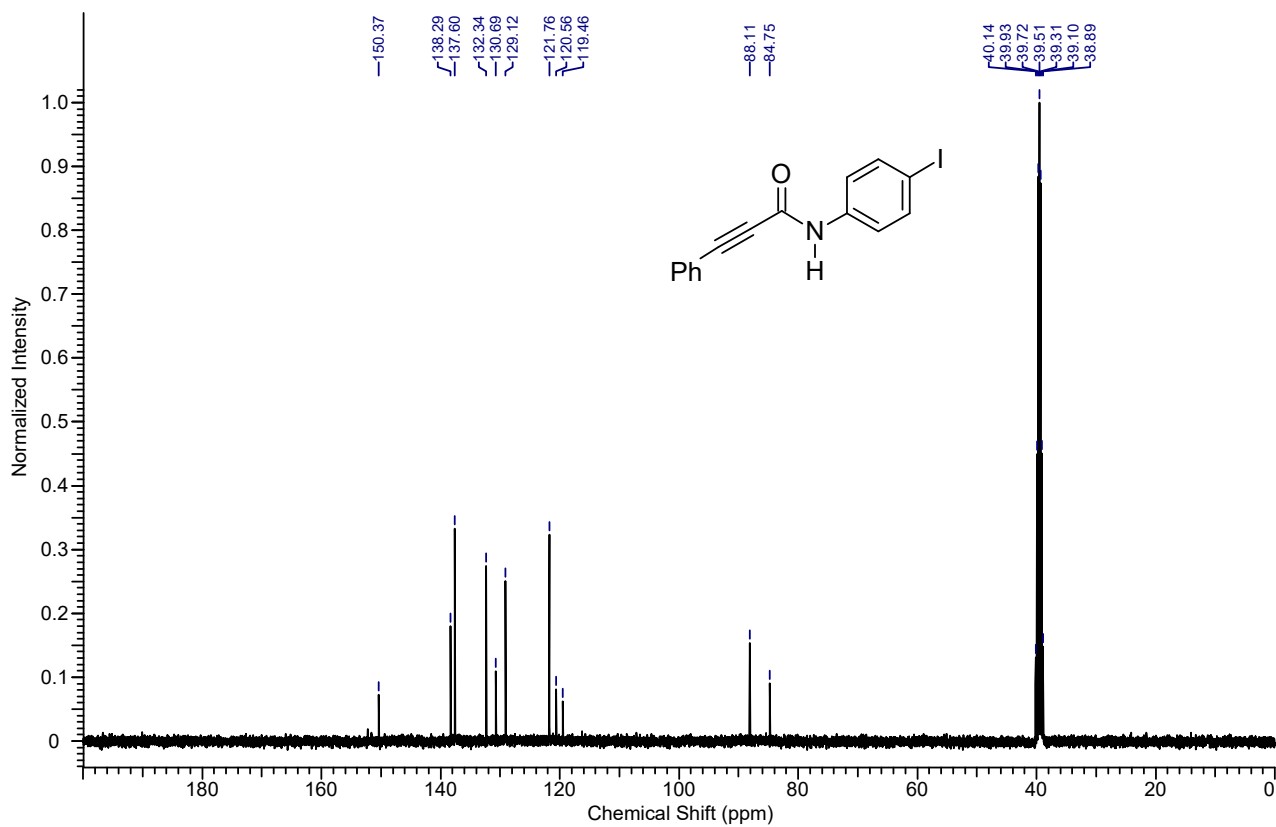

<sup>13</sup>C NMR spectrum of the compound **4ae**

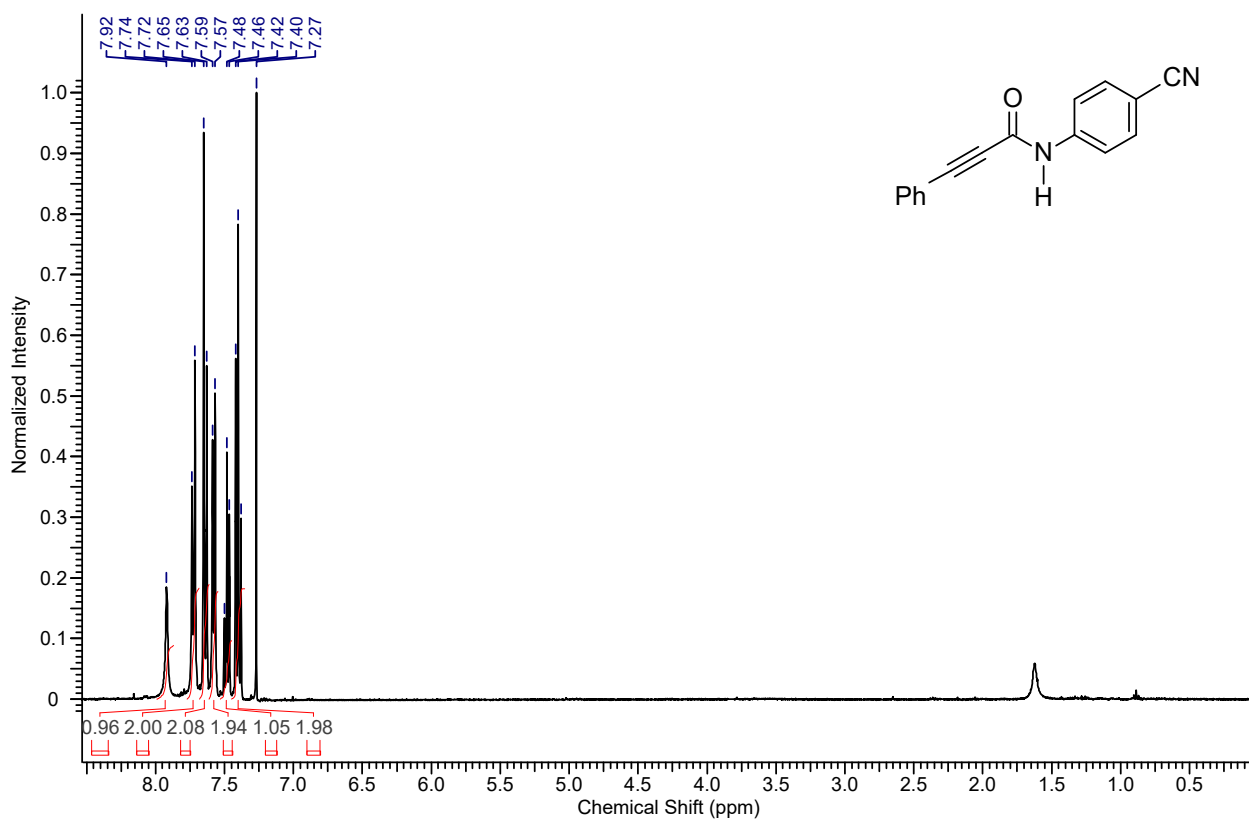

**<sup>1</sup>H NMR spectrum of the compound 4af**

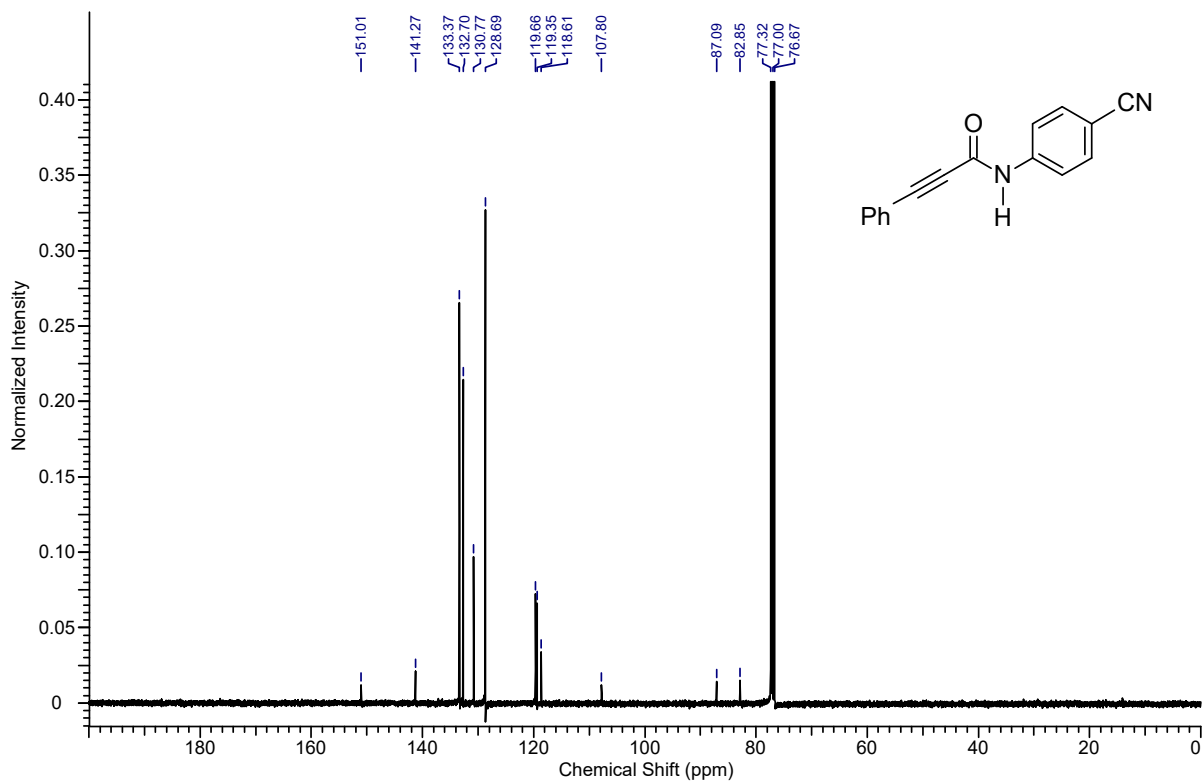

**<sup>13</sup>C NMR spectrum of the compound 4af**



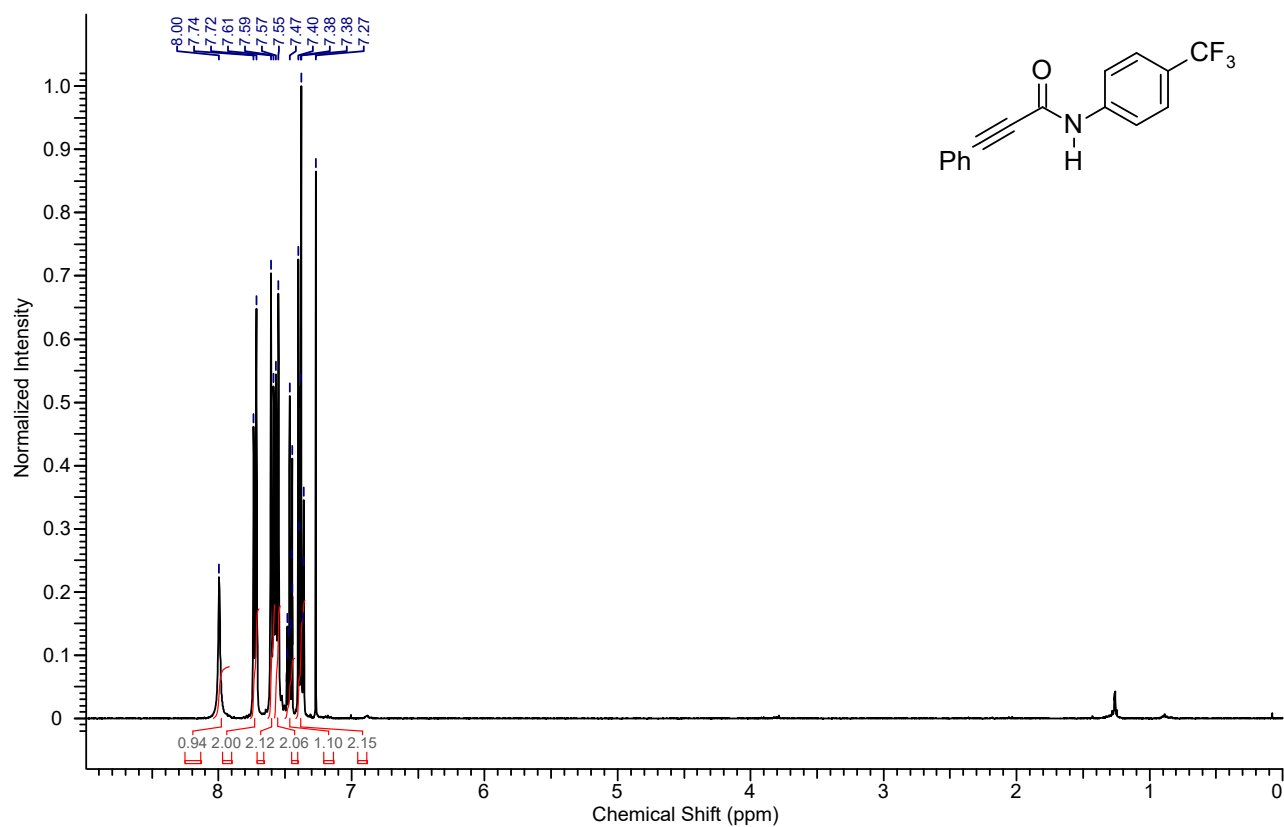

**<sup>1</sup>H NMR spectrum of the compound **4ag****

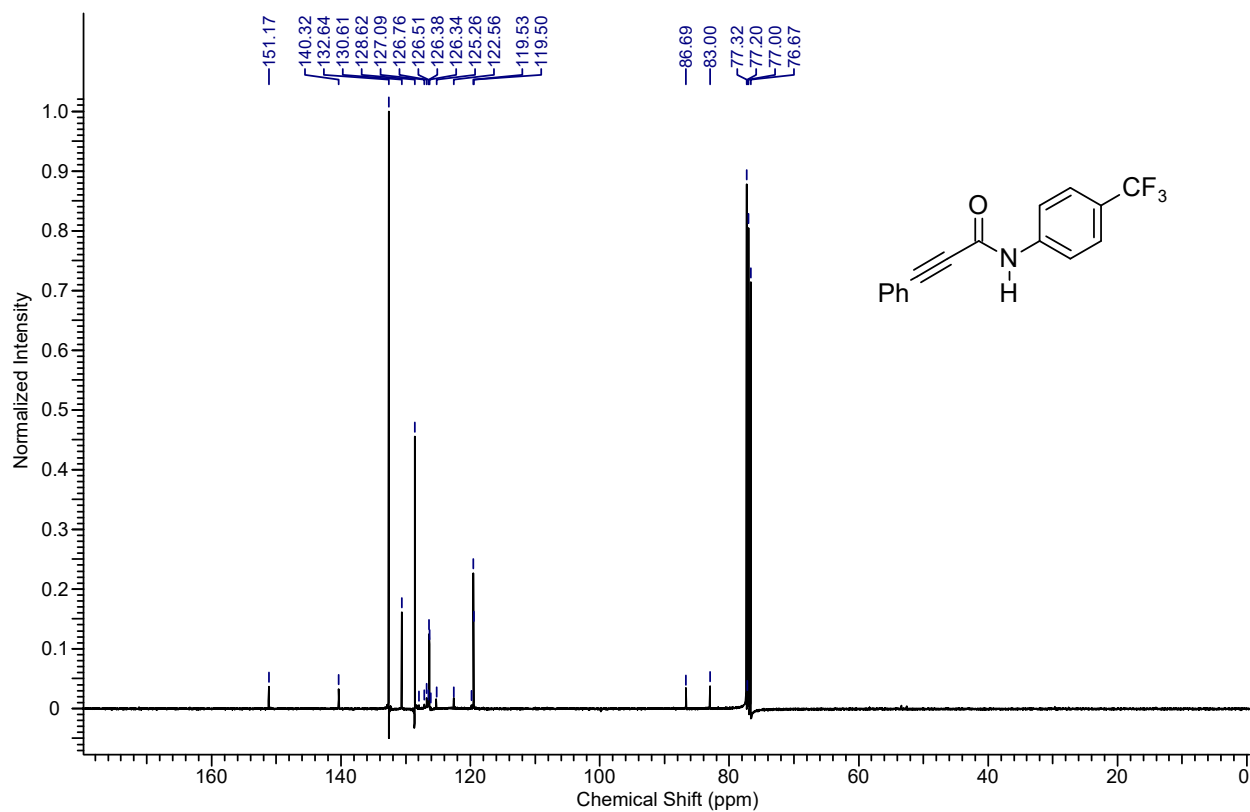

**<sup>13</sup>C NMR spectrum of the compound **4ag****

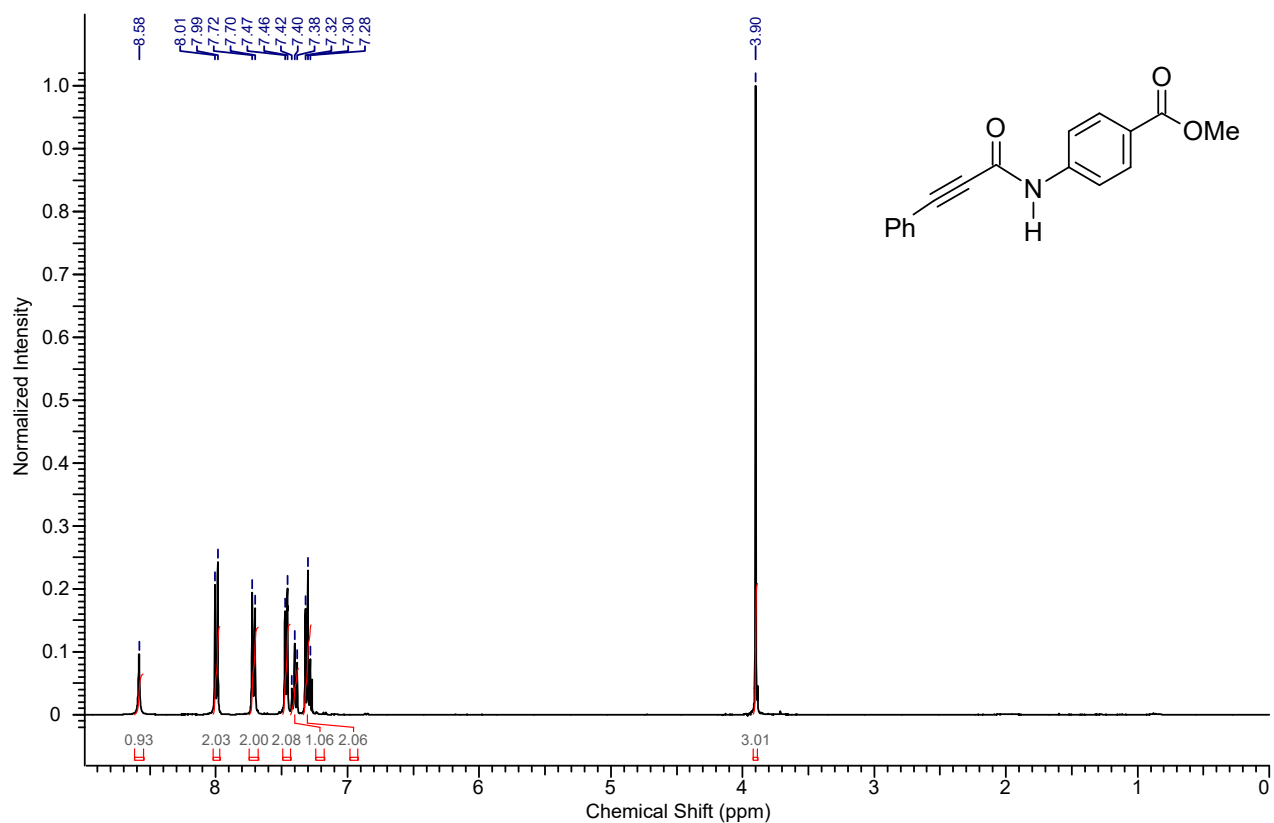

$^1\text{H}$  NMR spectrum of the compound **4ah**

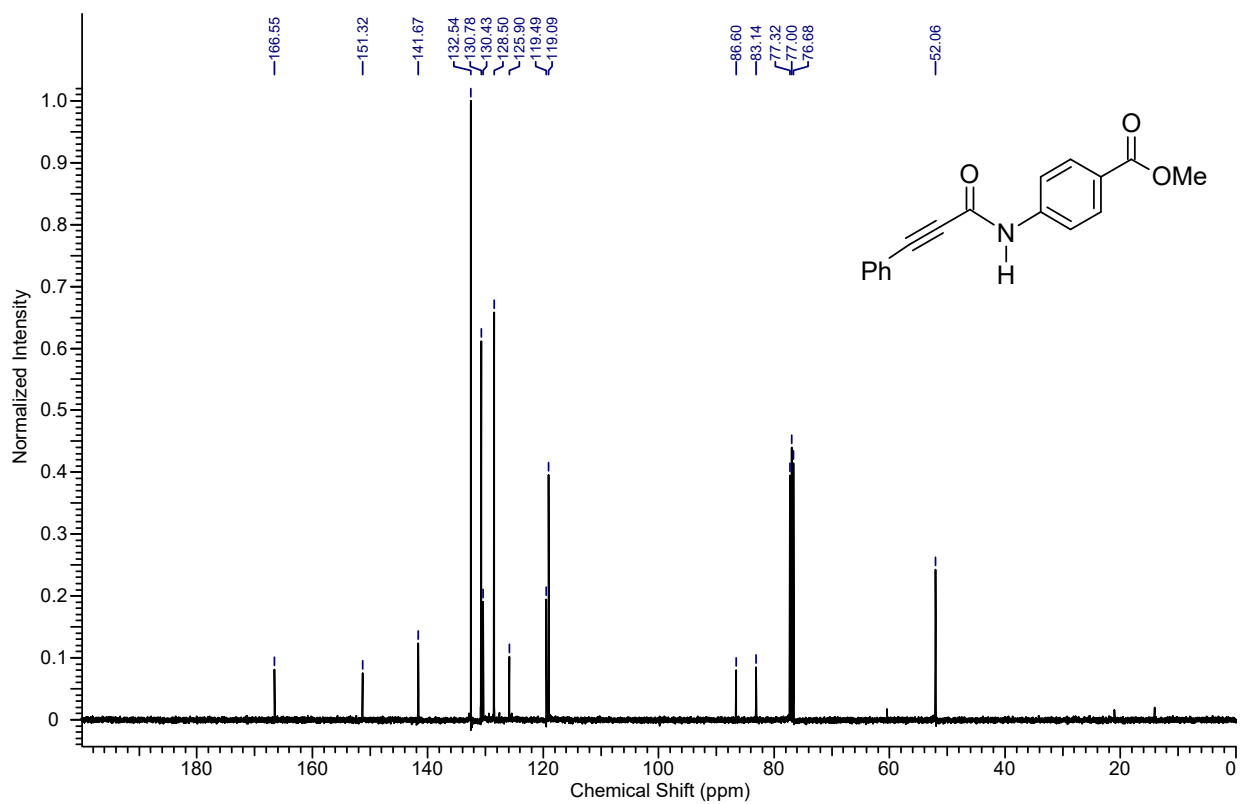

$^{13}\text{C}$  NMR spectrum of the compound **4ah**

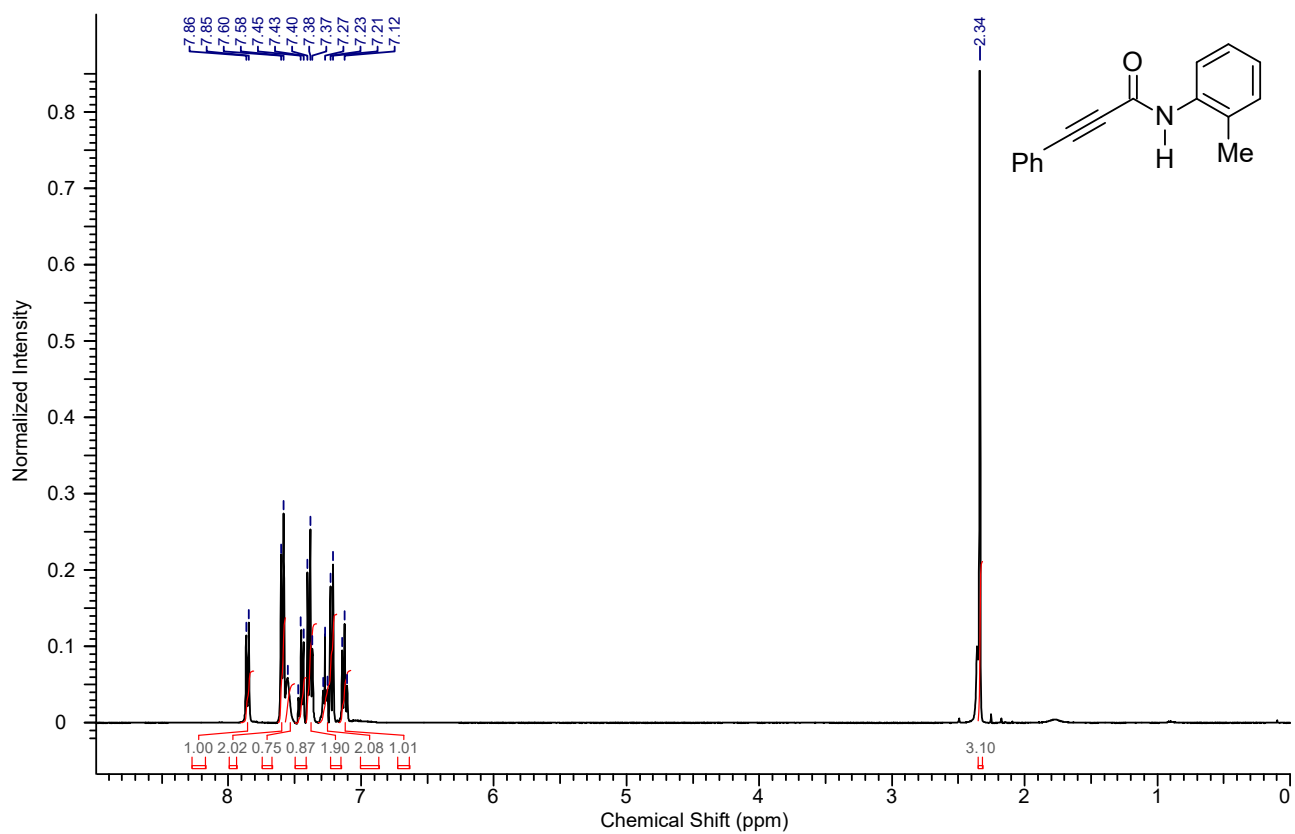

<sup>1</sup>H NMR spectrum of the compound 4ai

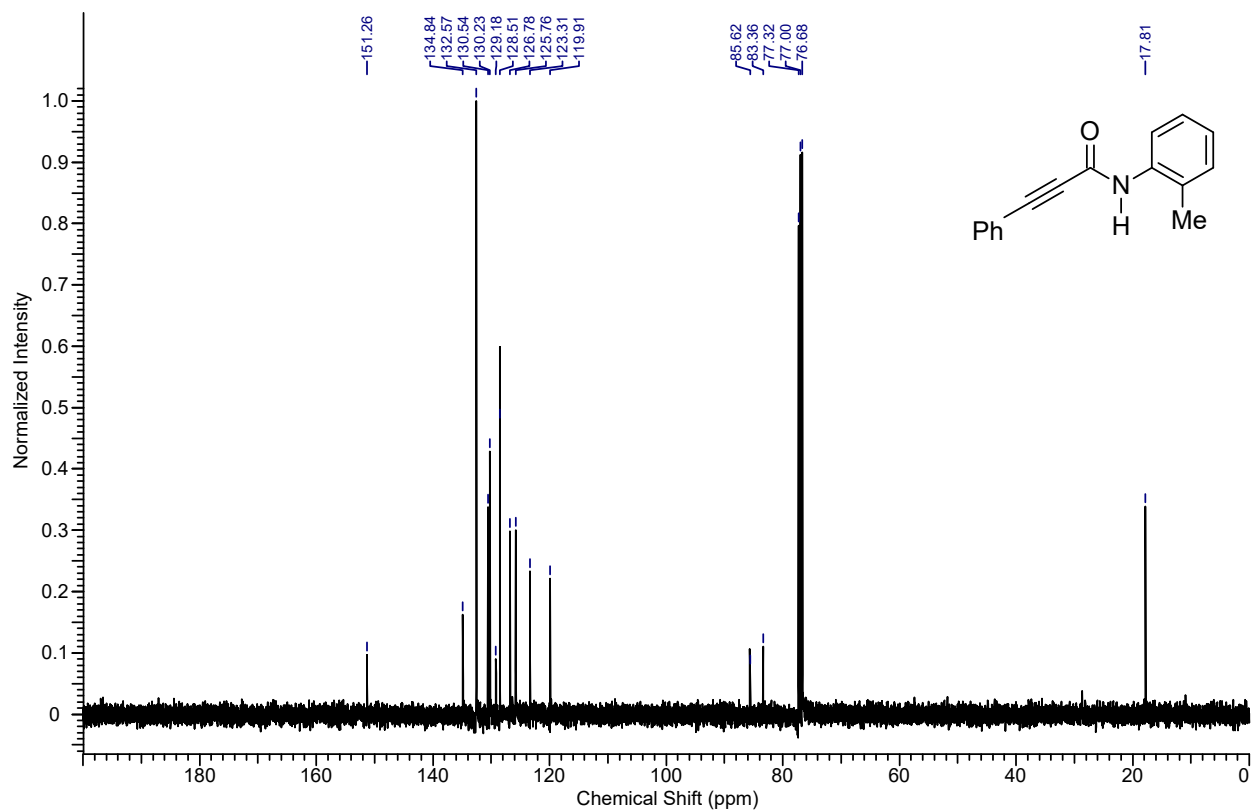

<sup>13</sup>C NMR spectrum of the compound 4ai

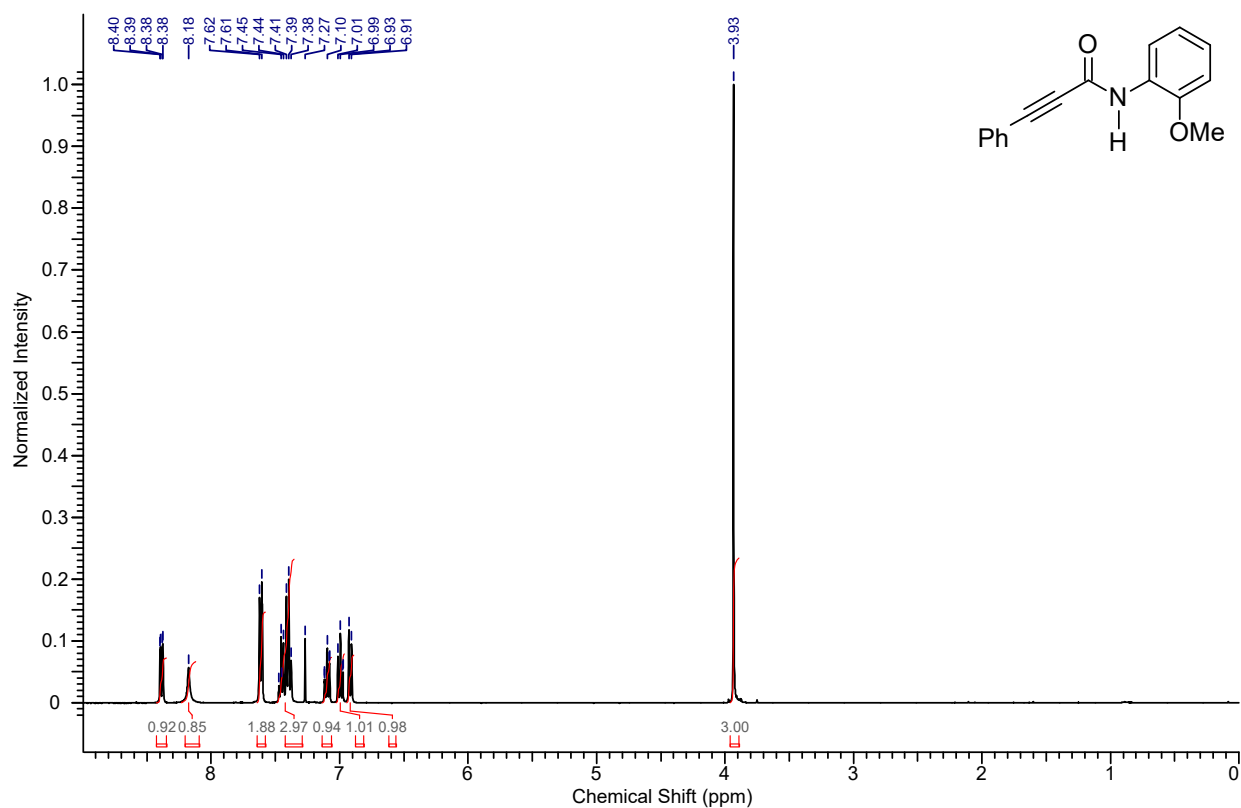

<sup>1</sup>H NMR spectrum of the compound **4aj**

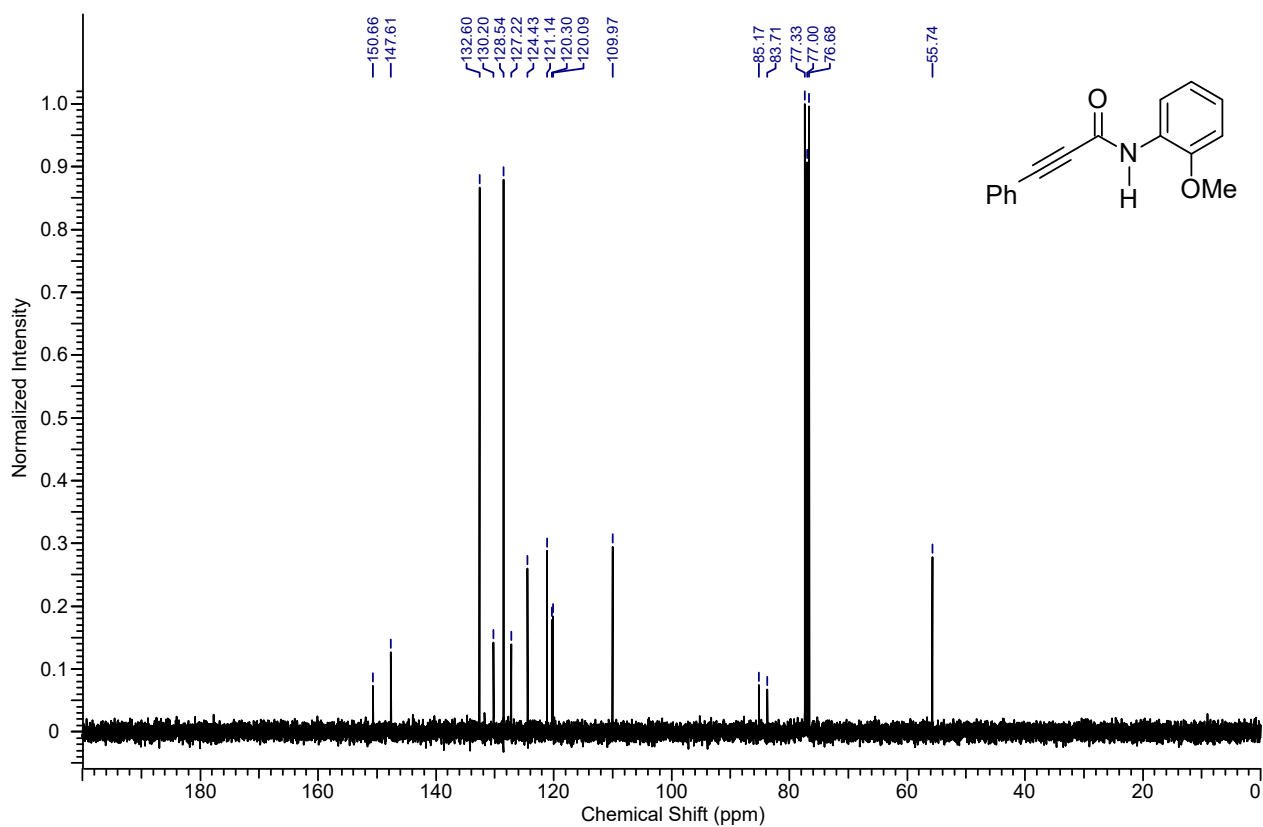

<sup>13</sup>C NMR spectrum of the compound **4aj**

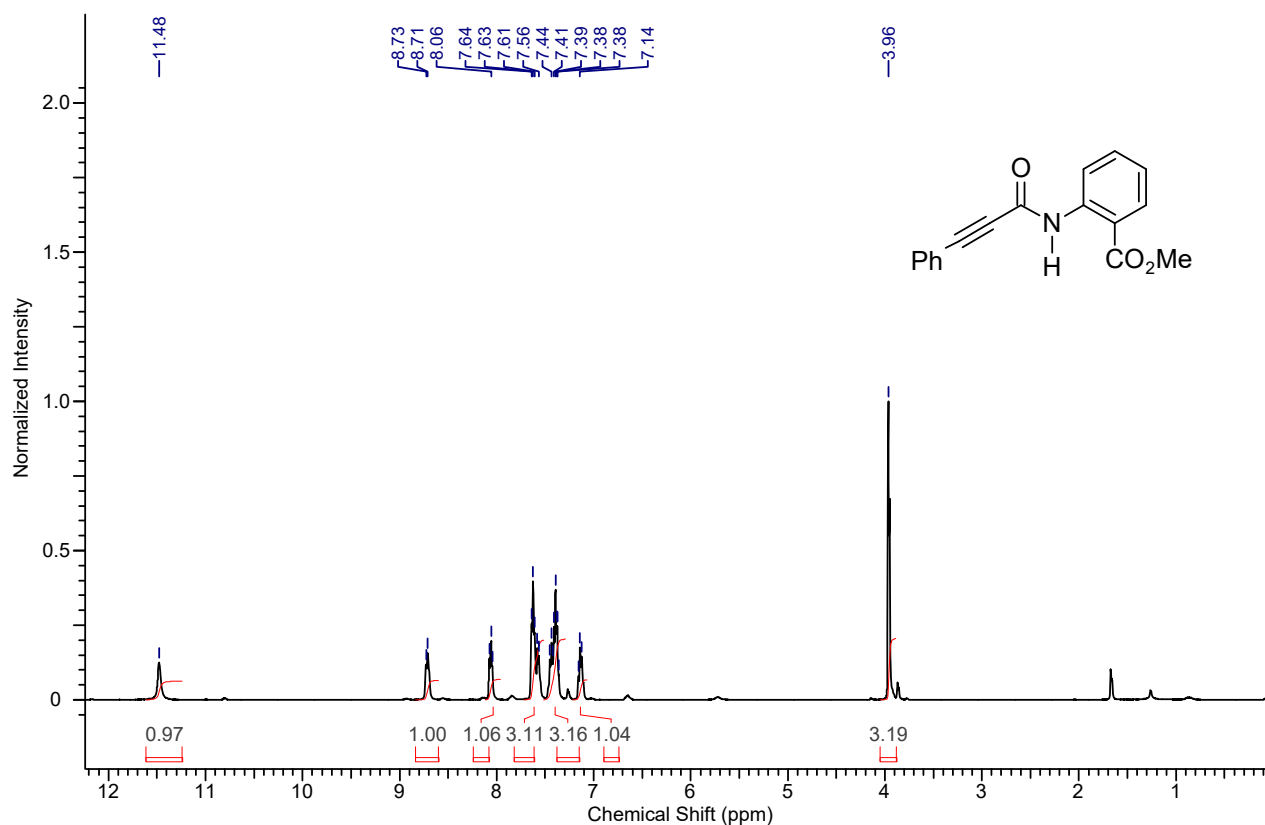

<sup>1</sup>H NMR spectrum of the compound **4ak**

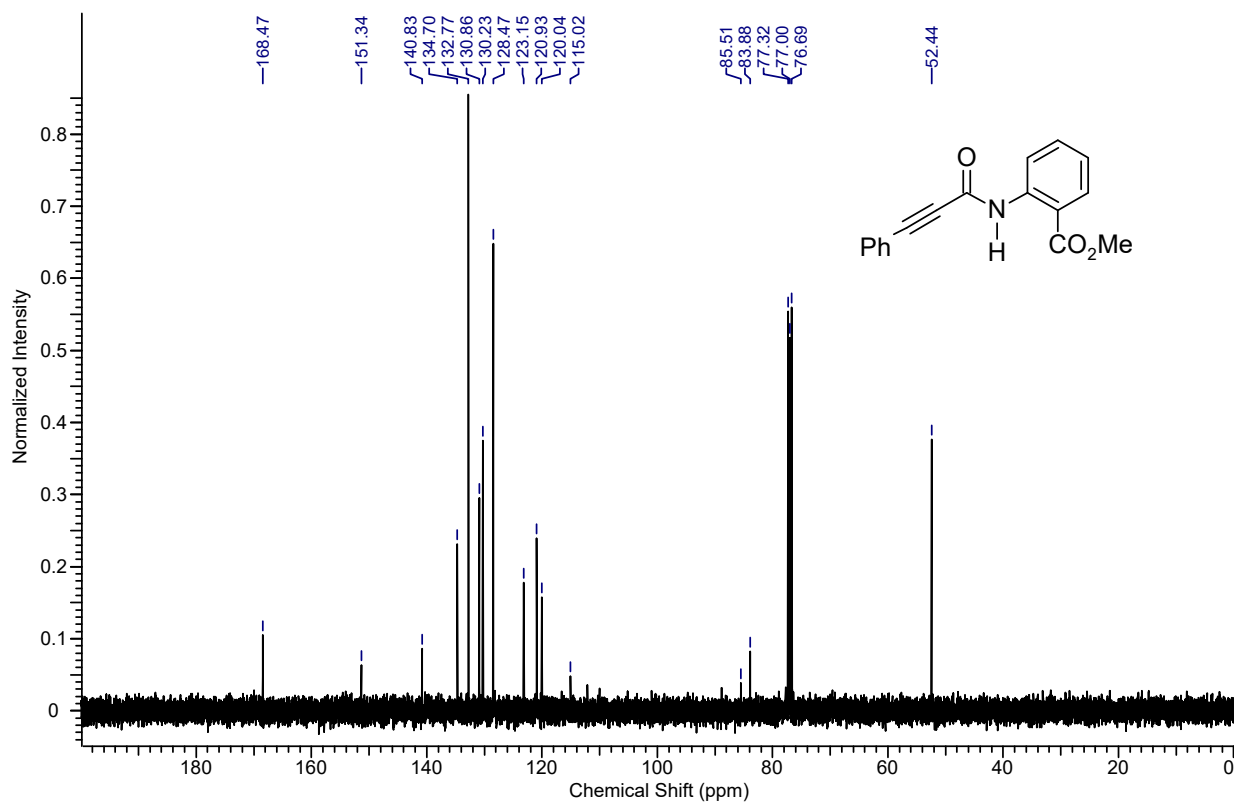

<sup>13</sup>C NMR spectrum of the compound **4ak**

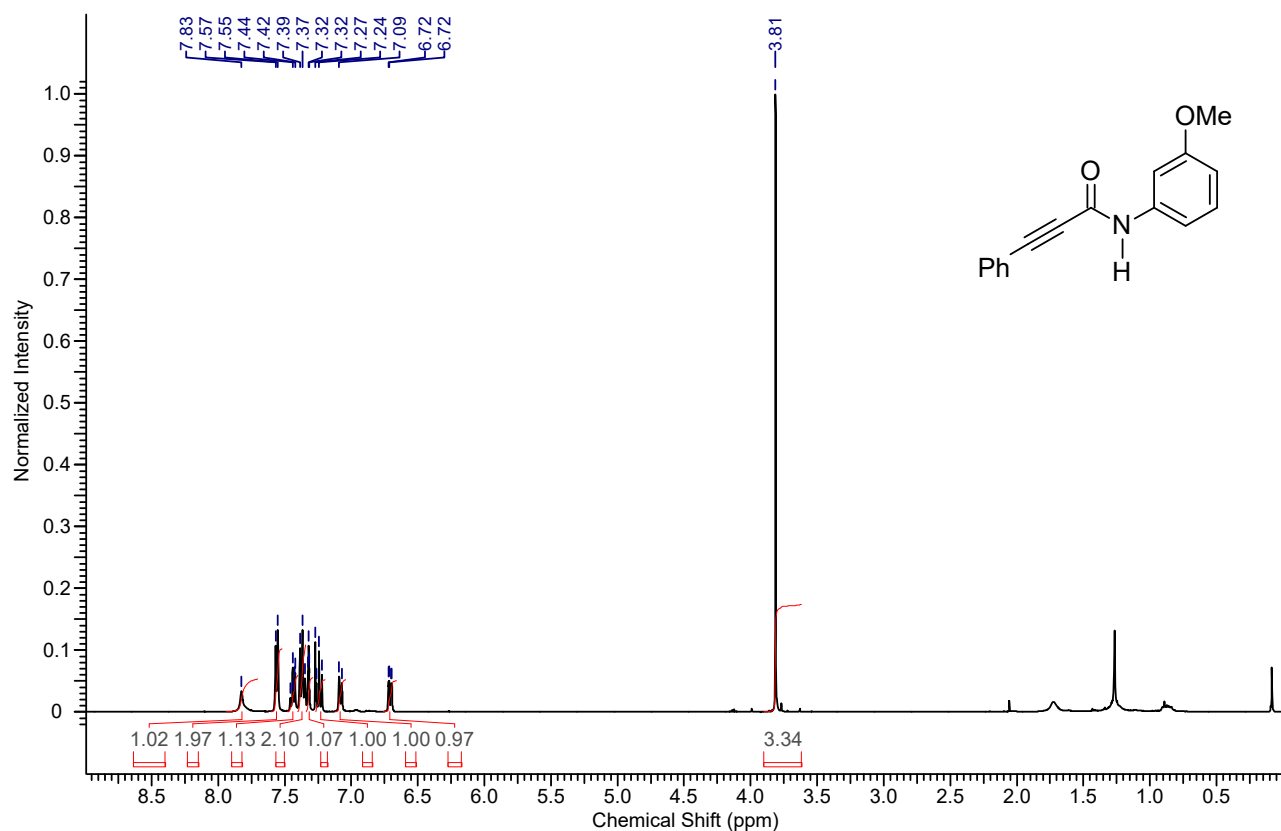

<sup>1</sup>H NMR spectrum of the compound 4al

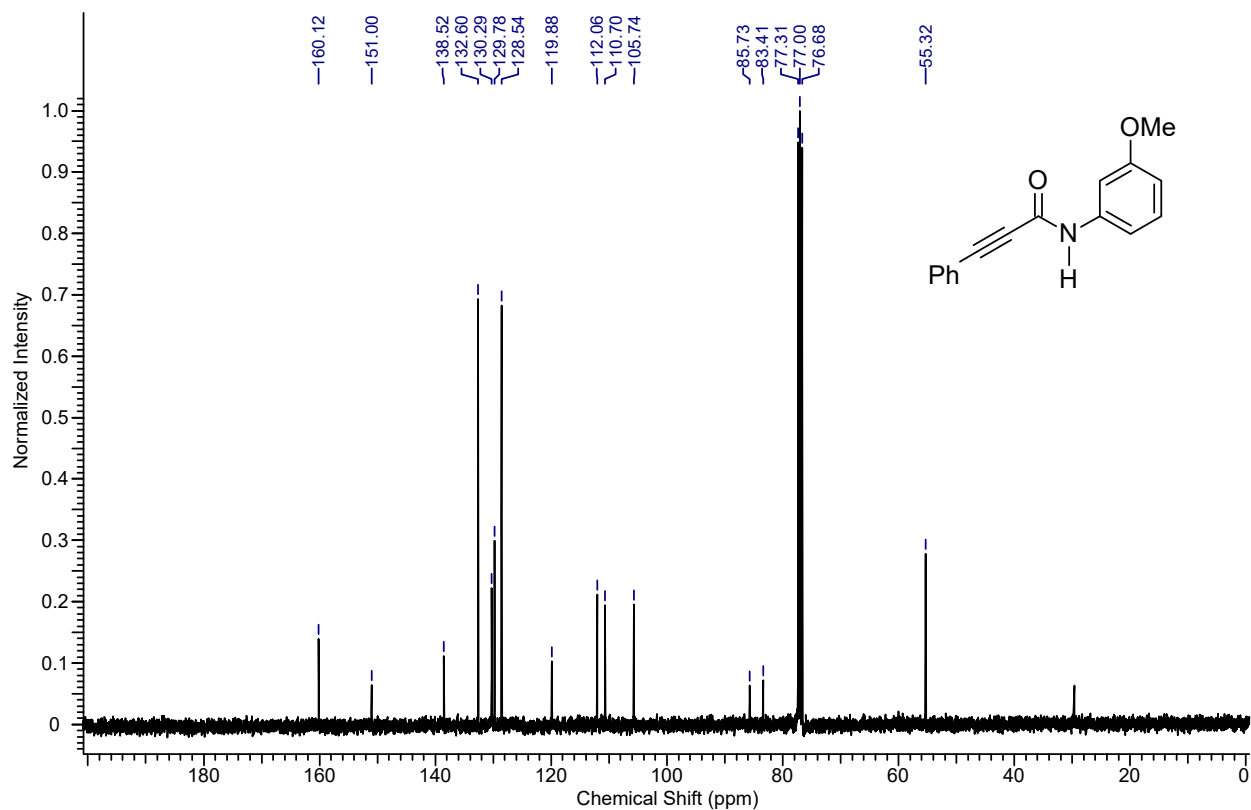

<sup>13</sup>C NMR spectrum of the compound 4al

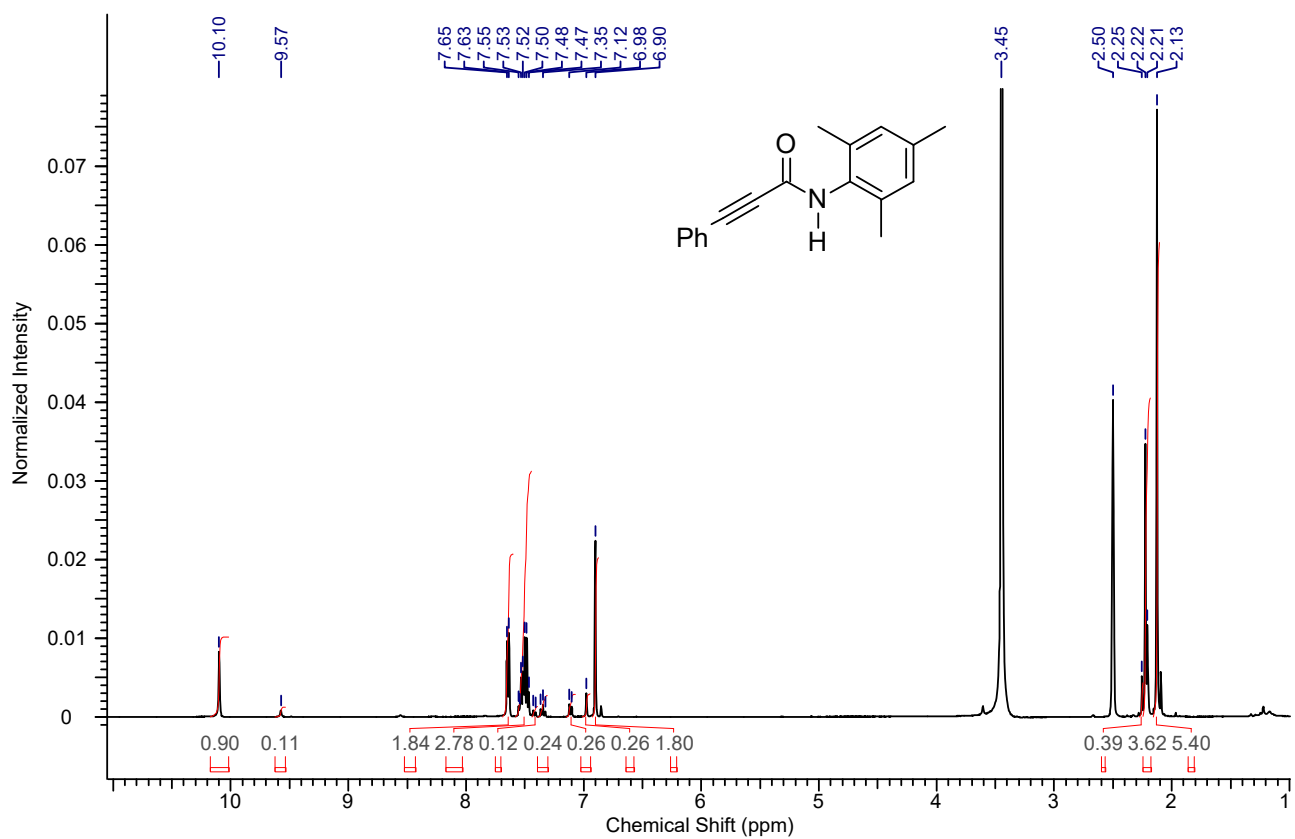

<sup>1</sup>H NMR spectrum of the compound **4am** (a 9:1 mixture of rotamers)

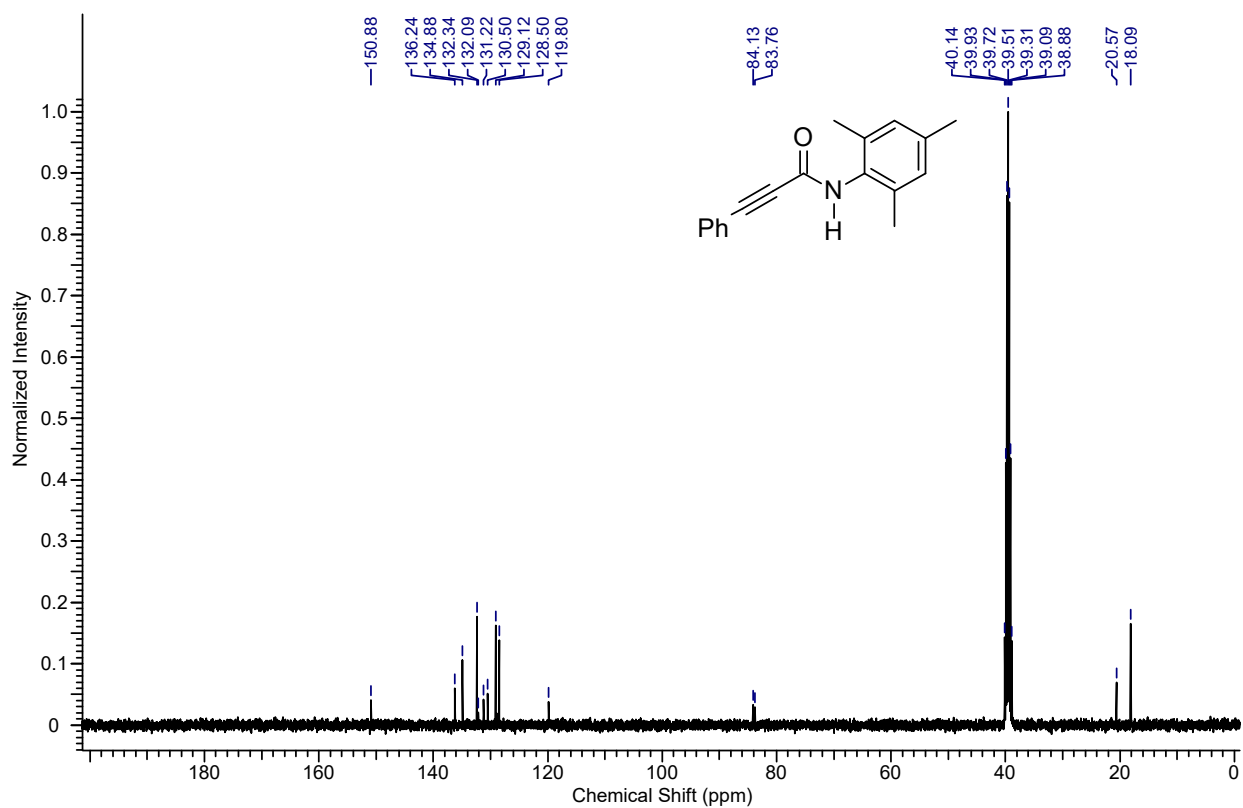

<sup>13</sup>C NMR spectrum of the compound **4am** (a 9:1 mixture of rotamers)

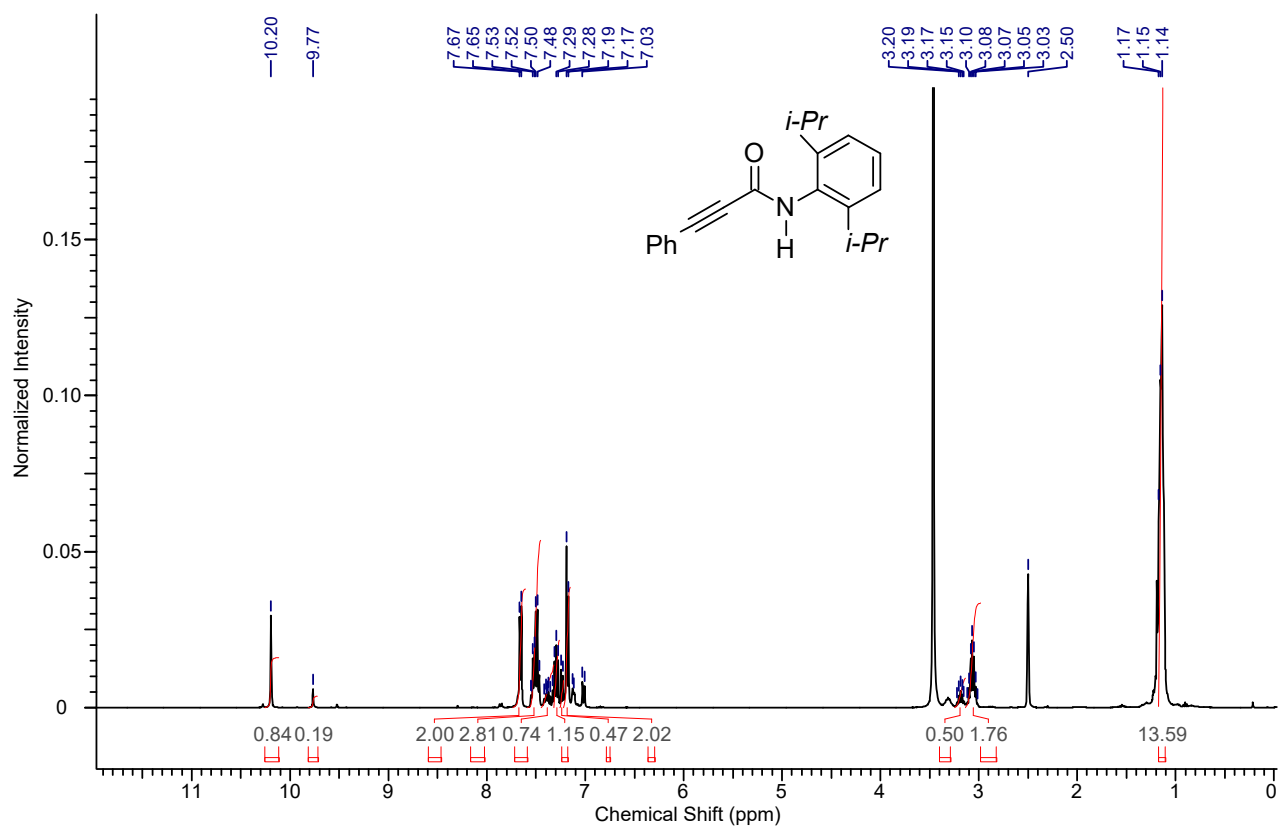

<sup>1</sup>H NMR spectrum of the compound **4an** (a 4:1 mixture of rotamers)

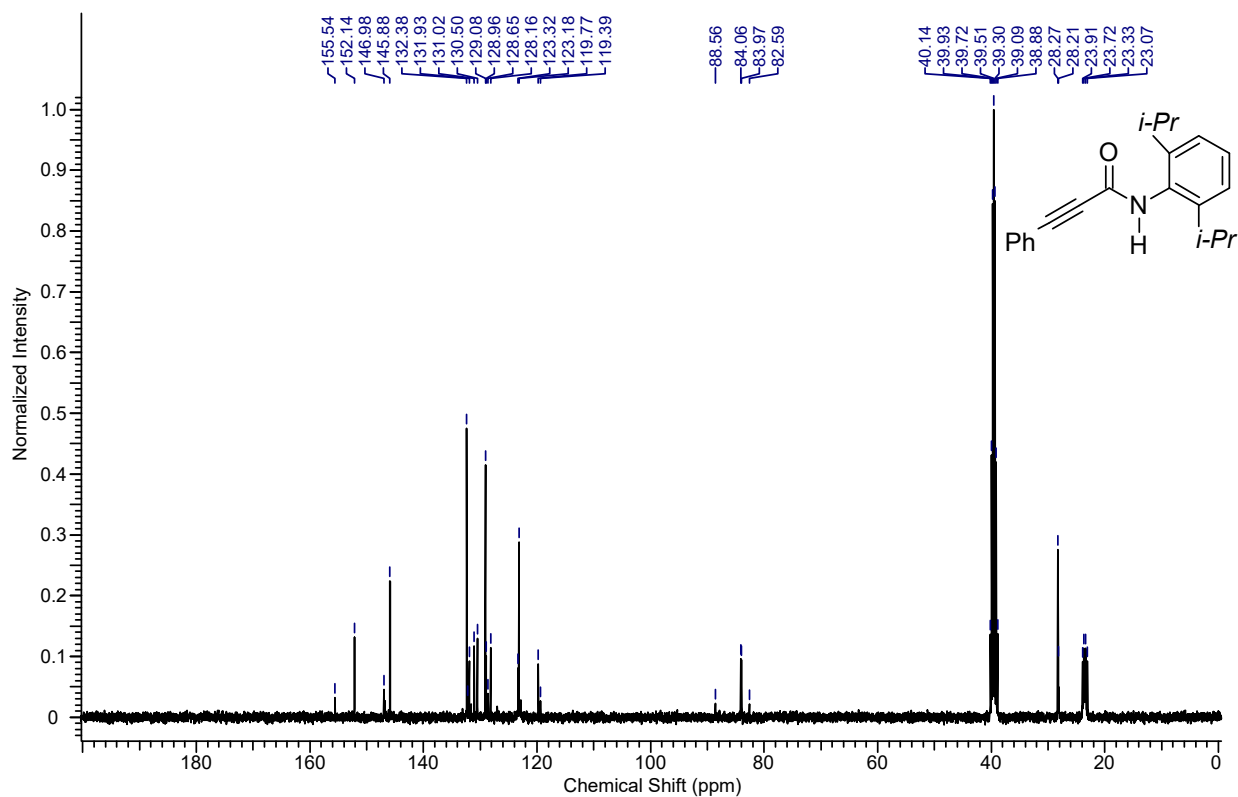

<sup>13</sup>C NMR spectrum of the compound **4an** (a 4:1 mixture of rotamers)



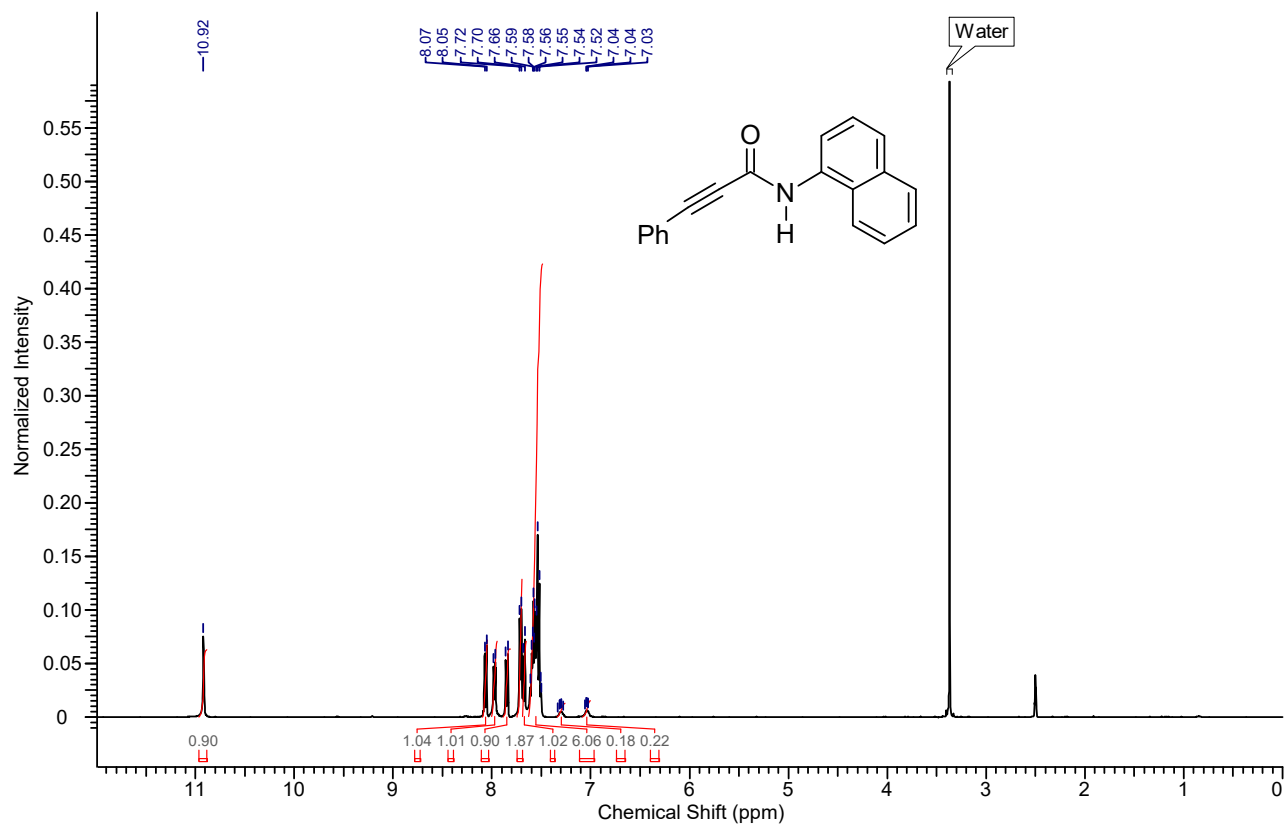

<sup>1</sup>H NMR spectrum of the compound **4ao** (a 5:1 mixture of rotamers)

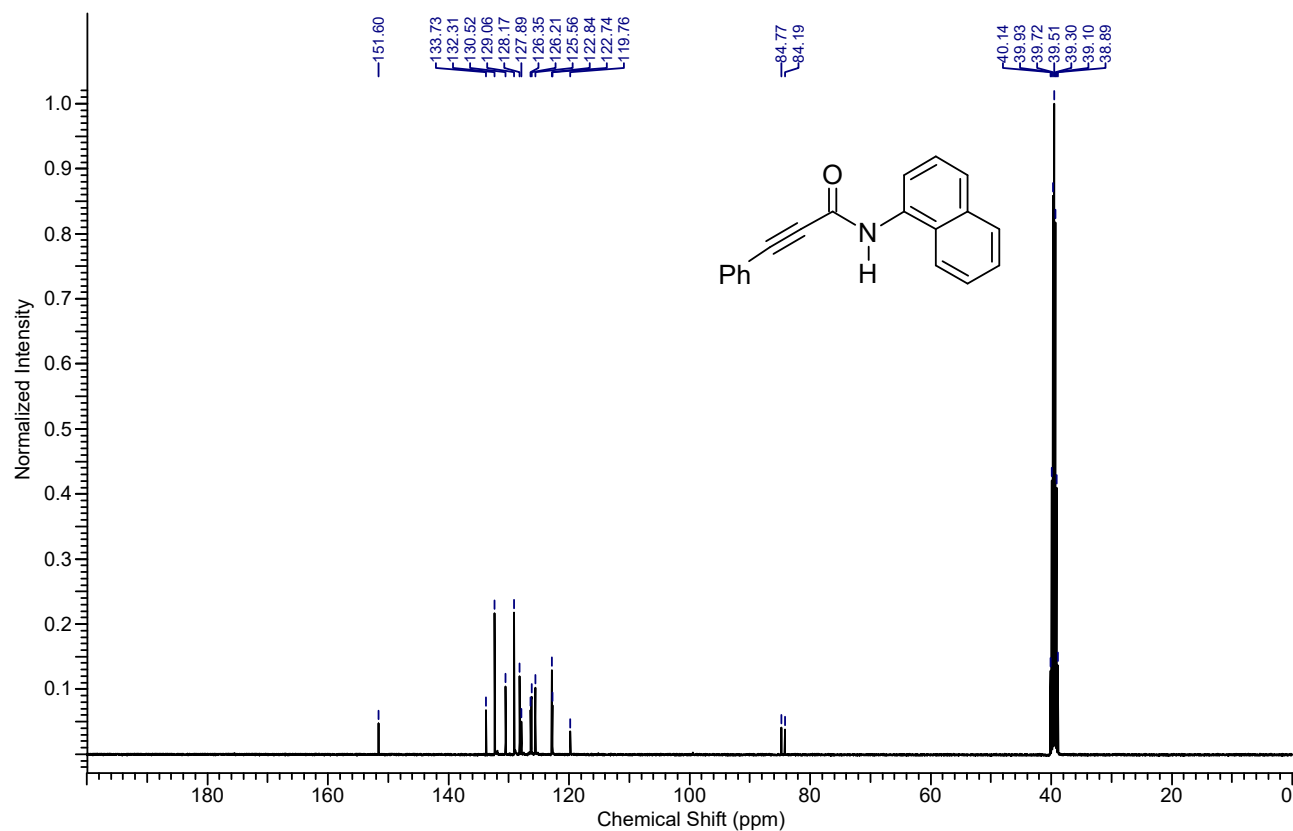

<sup>13</sup>C NMR spectrum of the compound **4ao**

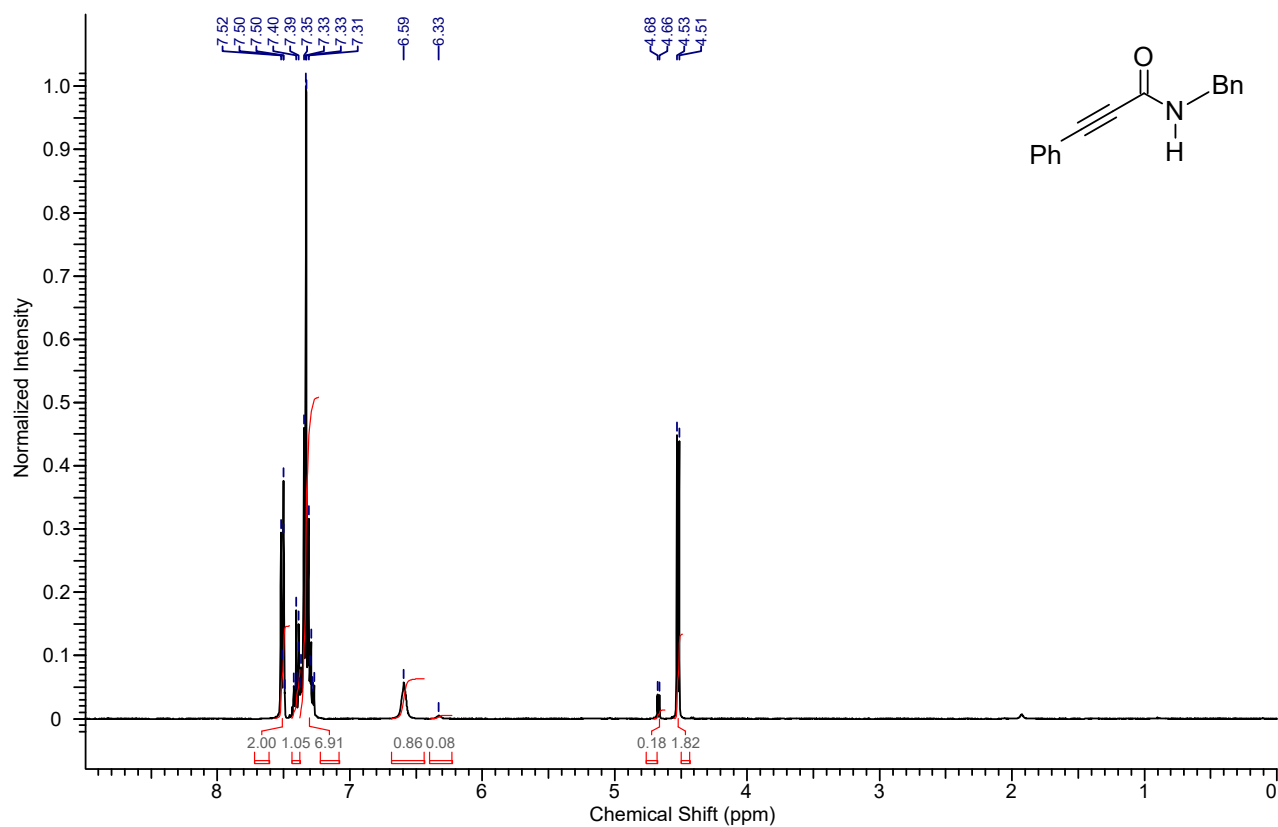

<sup>1</sup>H NMR spectrum of the compound **4ap** (a 9:1 mixture of rotamers)

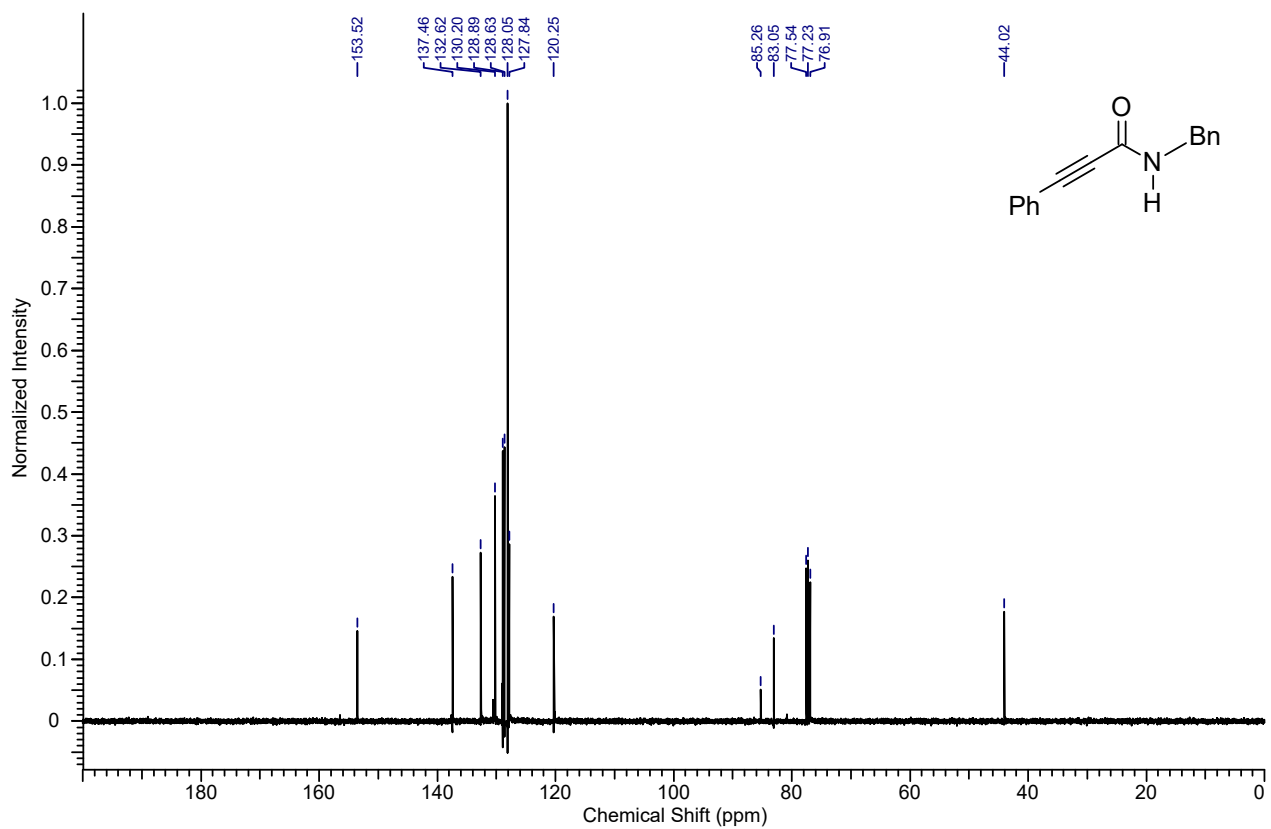

<sup>13</sup>C NMR spectrum of the compound **4ap**

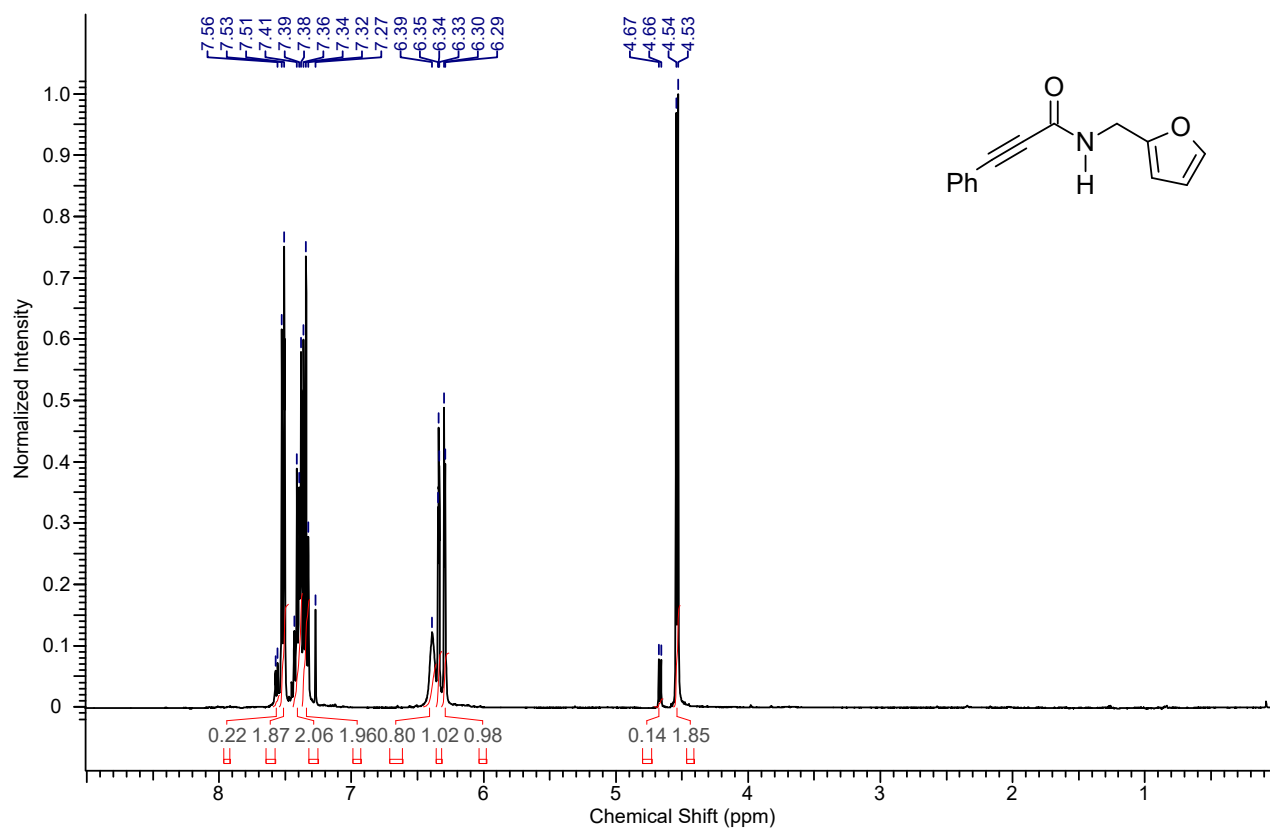

<sup>1</sup>H NMR spectrum of the compound **4aq** (a 9:1 mixture of rotamers)

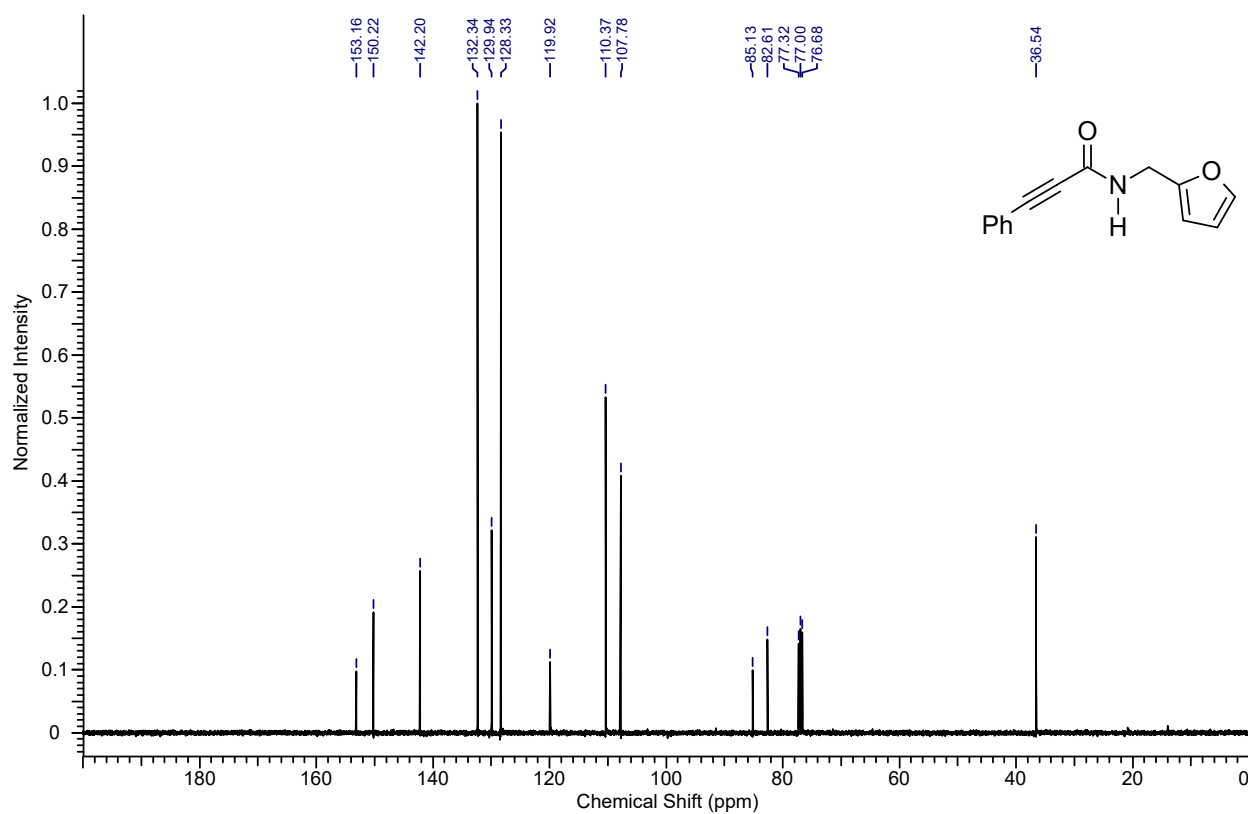

<sup>13</sup>C NMR spectrum of the compound **4aq**

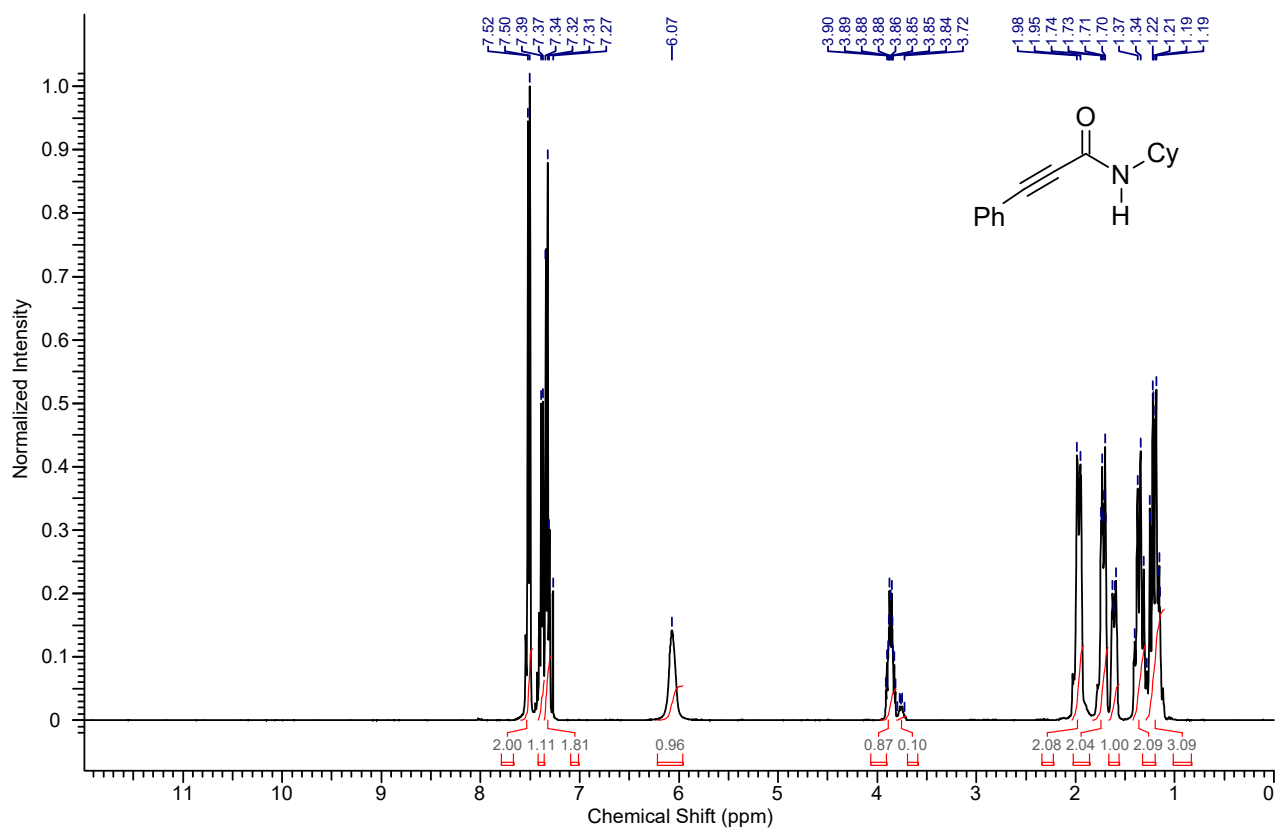

<sup>1</sup>H NMR spectrum of the compound **4ar** (a 9:1 mixture of rotamers)

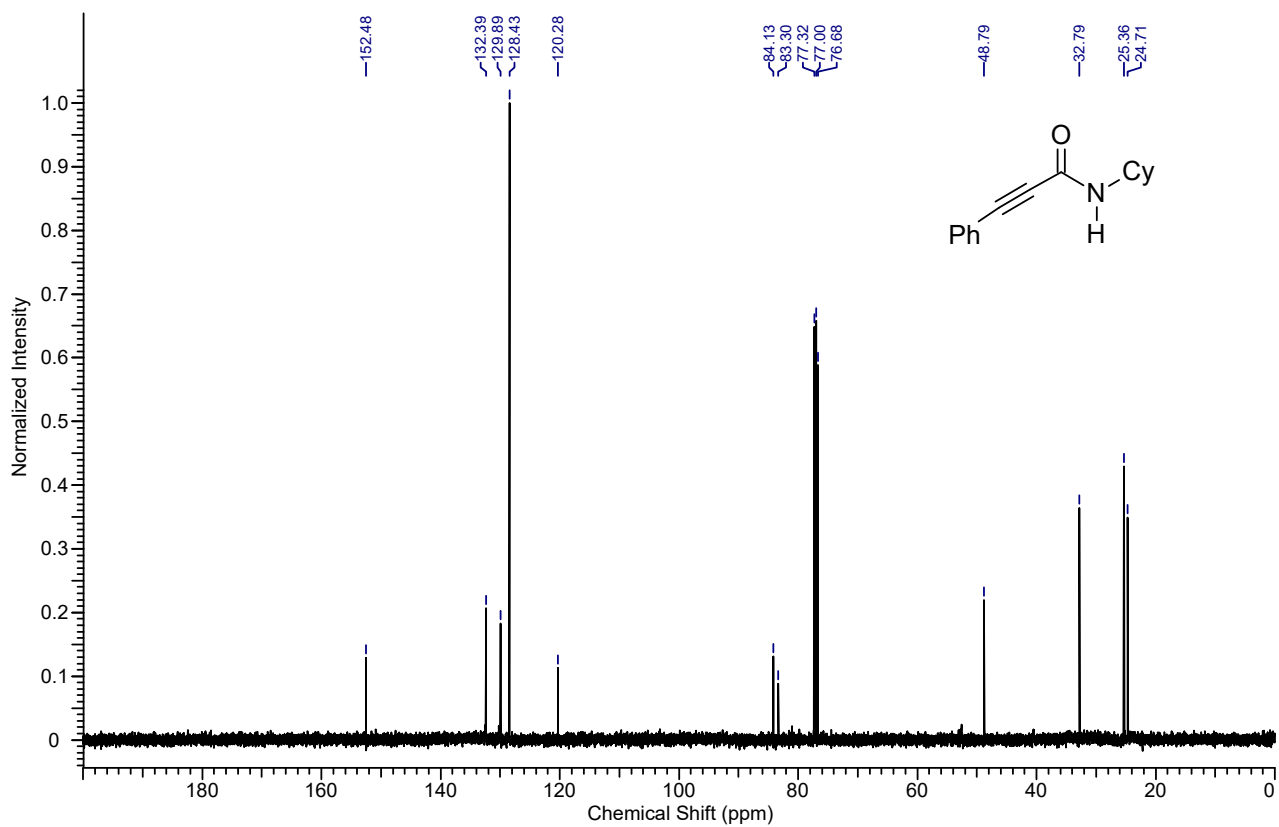

<sup>13</sup>C NMR spectrum of the compound **4ar**

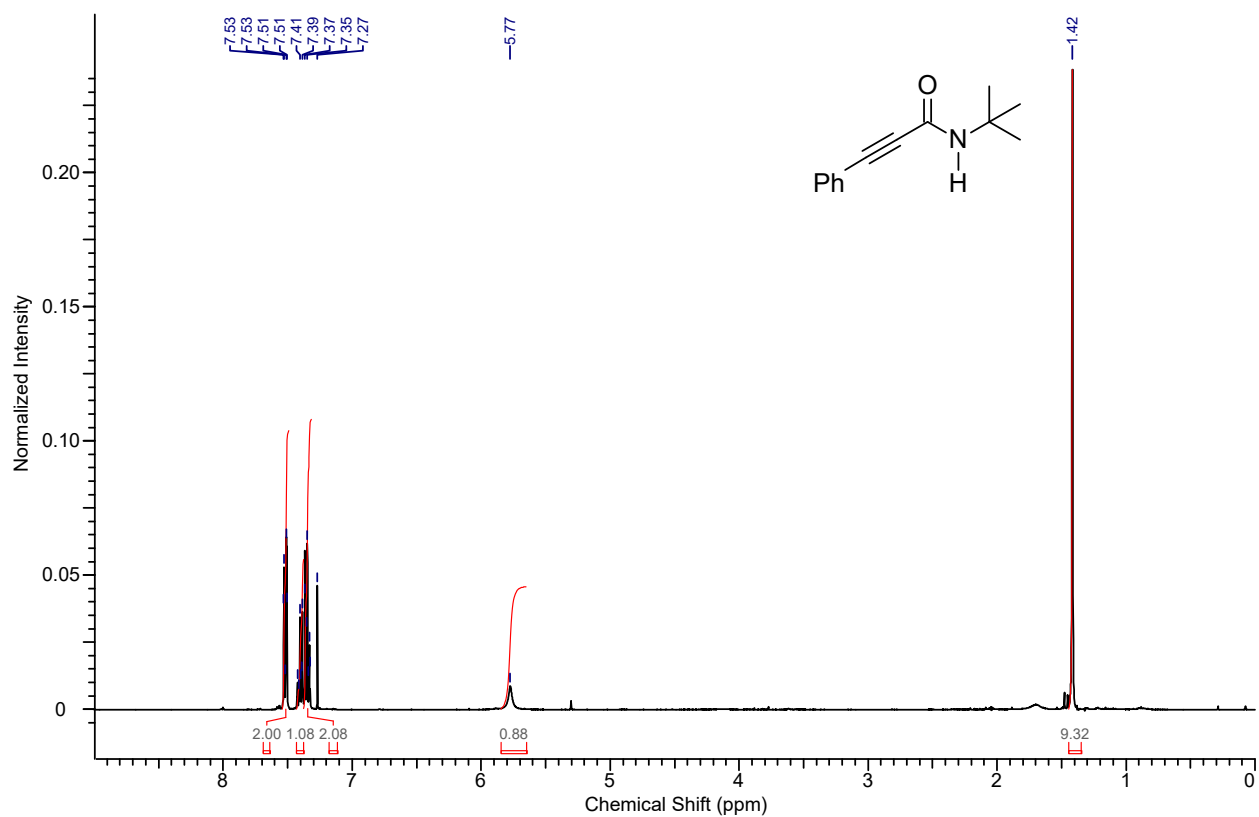

<sup>1</sup>H NMR spectrum of the compound 4as

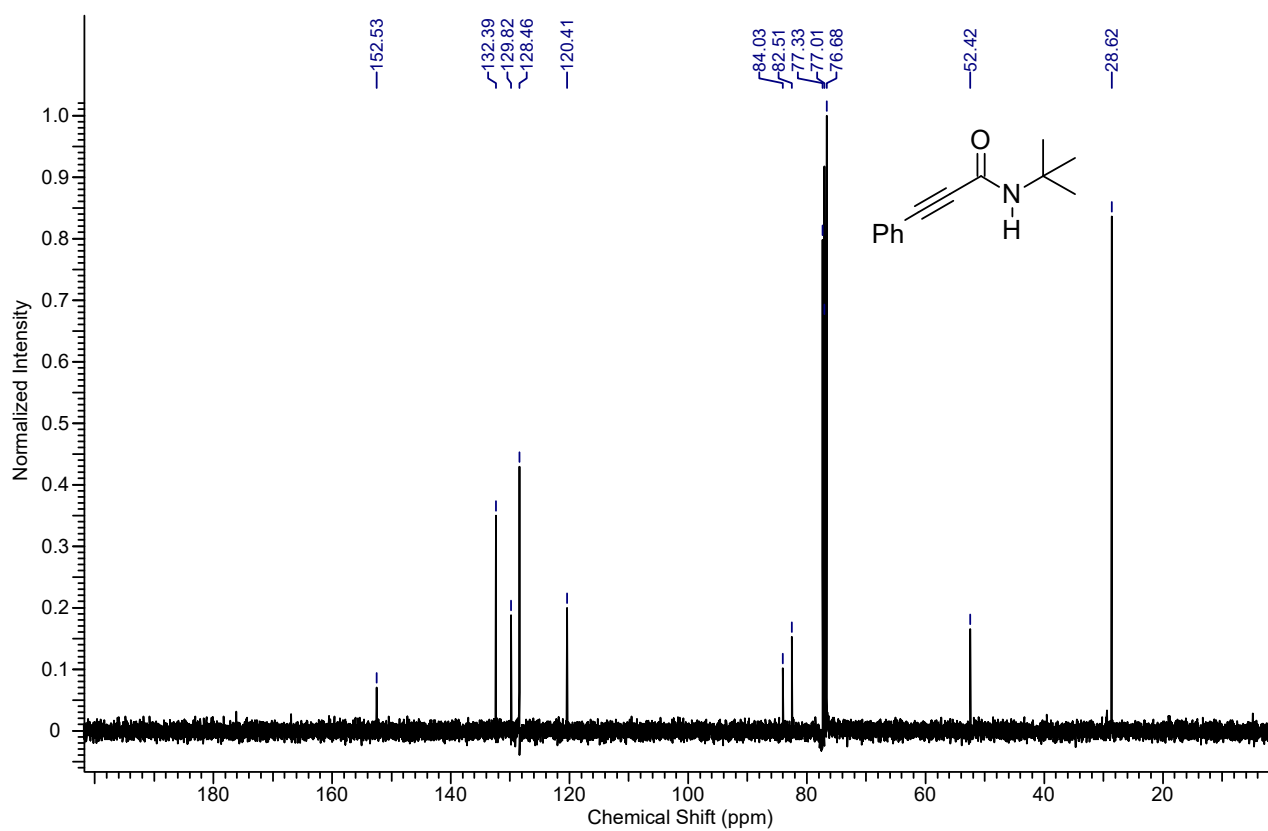

<sup>13</sup>C NMR spectrum of the compound 4as

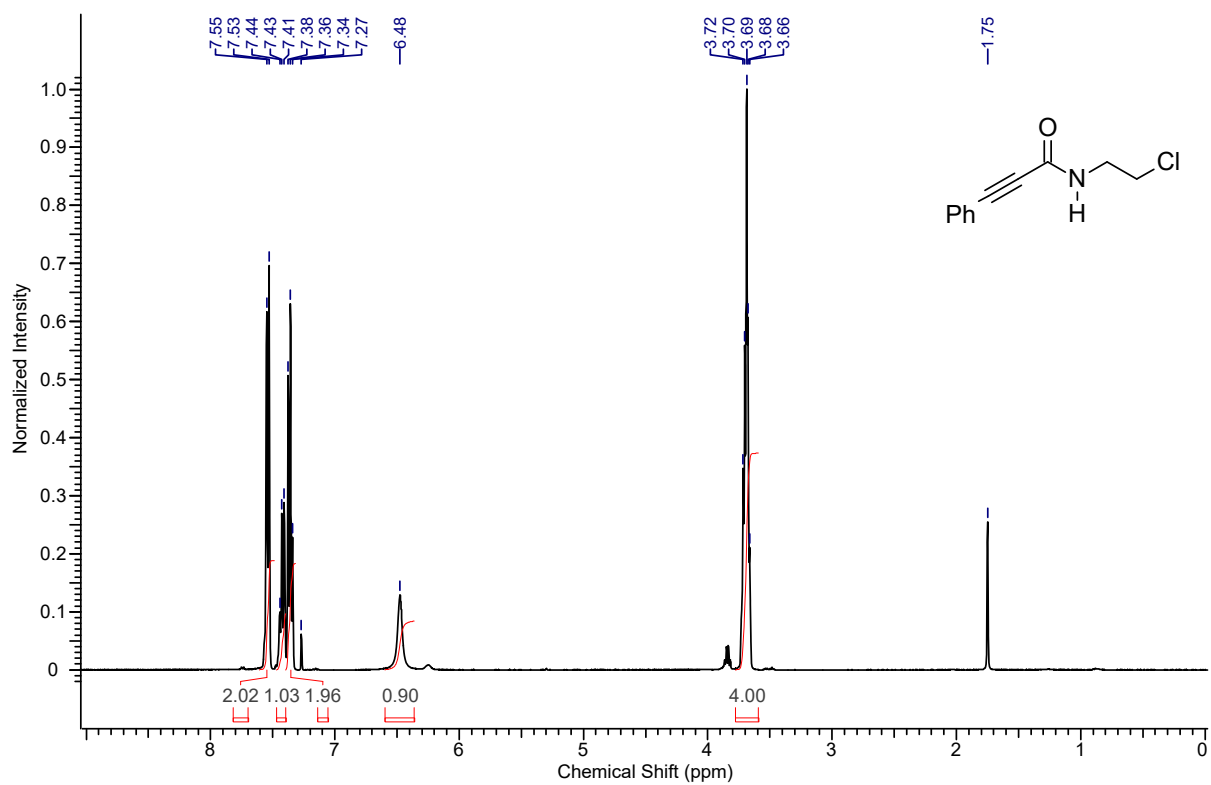

<sup>1</sup>H NMR spectrum of the compound 4at

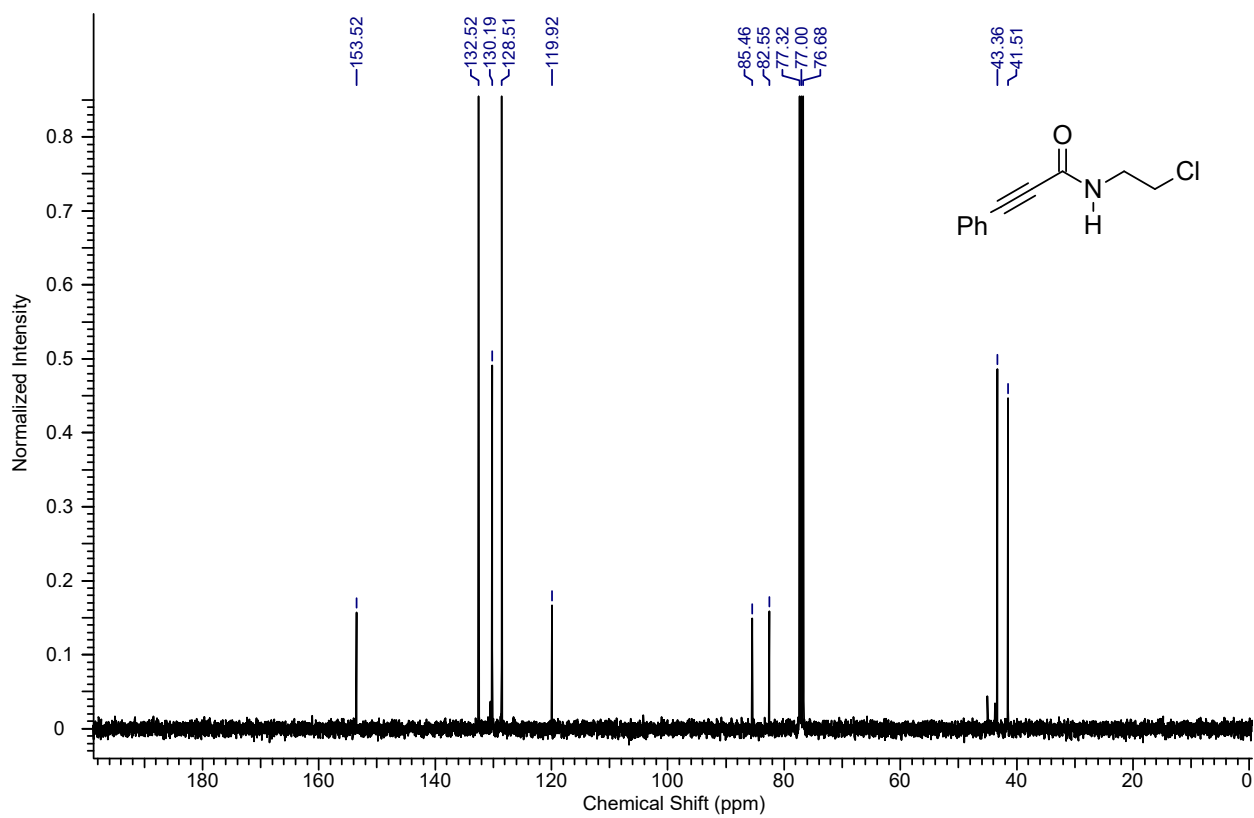

<sup>13</sup>C NMR spectrum of the compound 4at

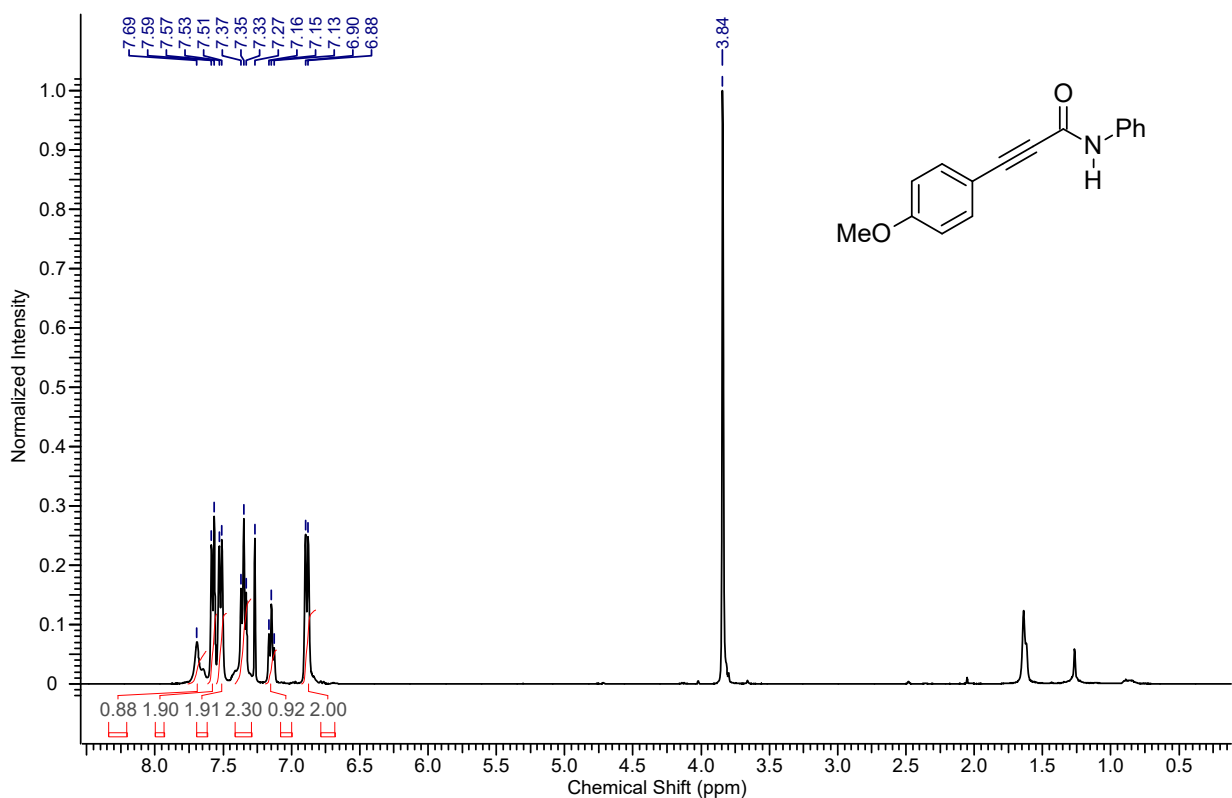

<sup>1</sup>H NMR spectrum of the compound **4ba**

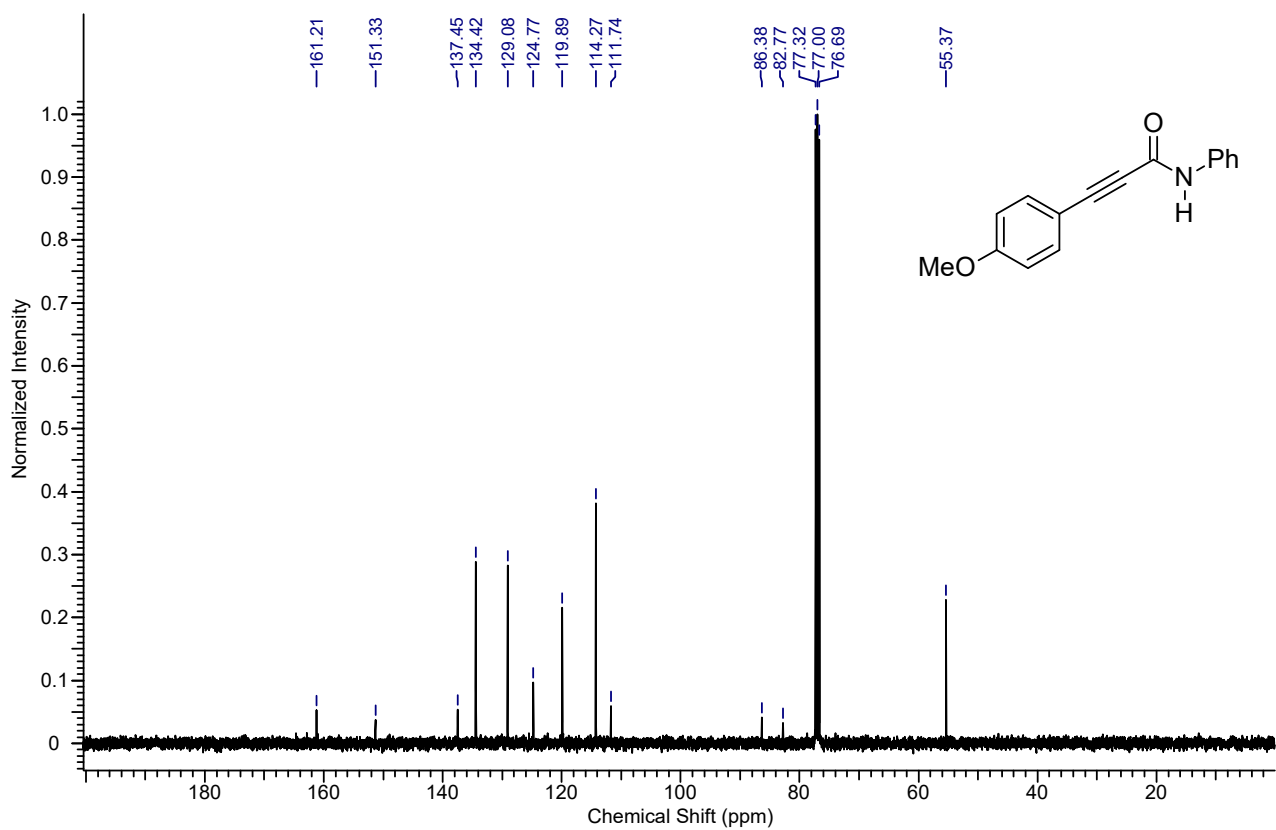

<sup>13</sup>C NMR spectrum of the compound **4ba**

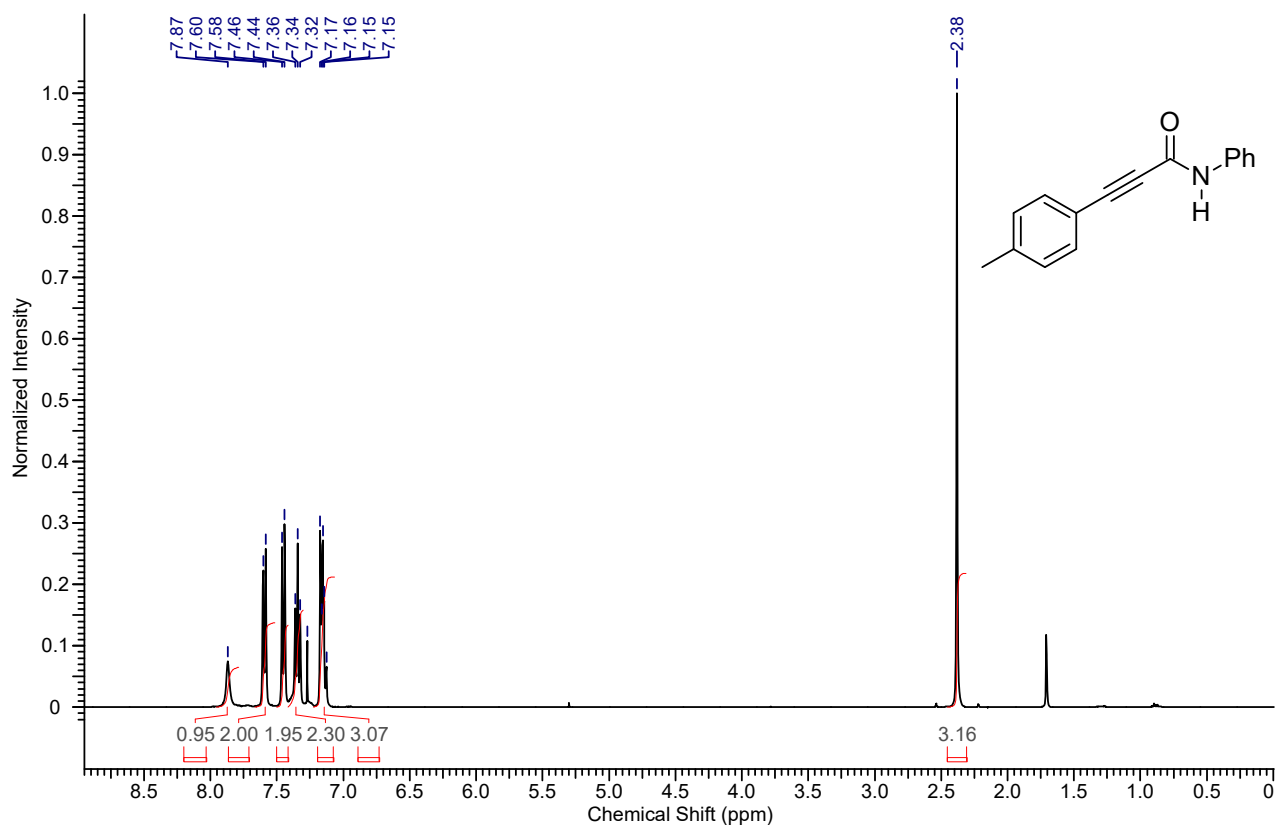

<sup>1</sup>H NMR spectrum of the compound **4ca**

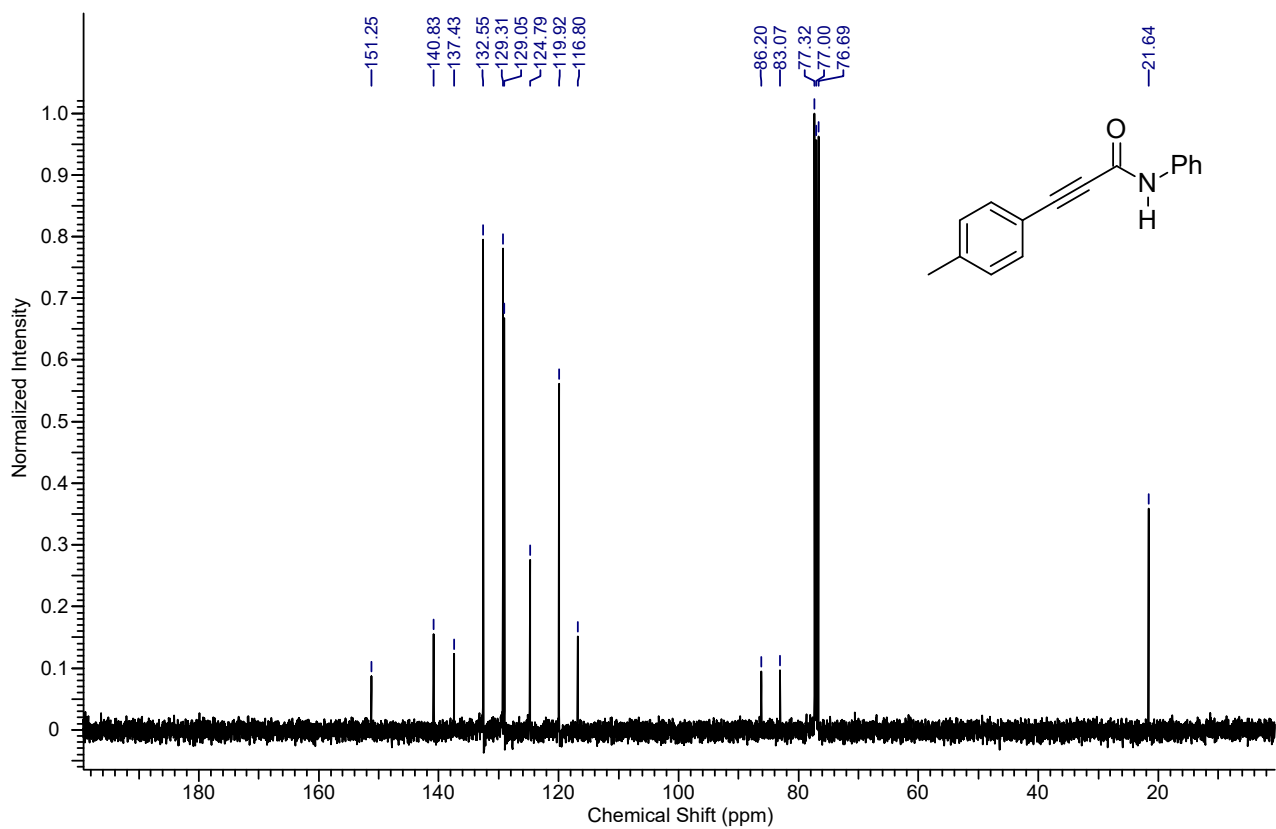

<sup>13</sup>C NMR spectrum of the compound **4ca**



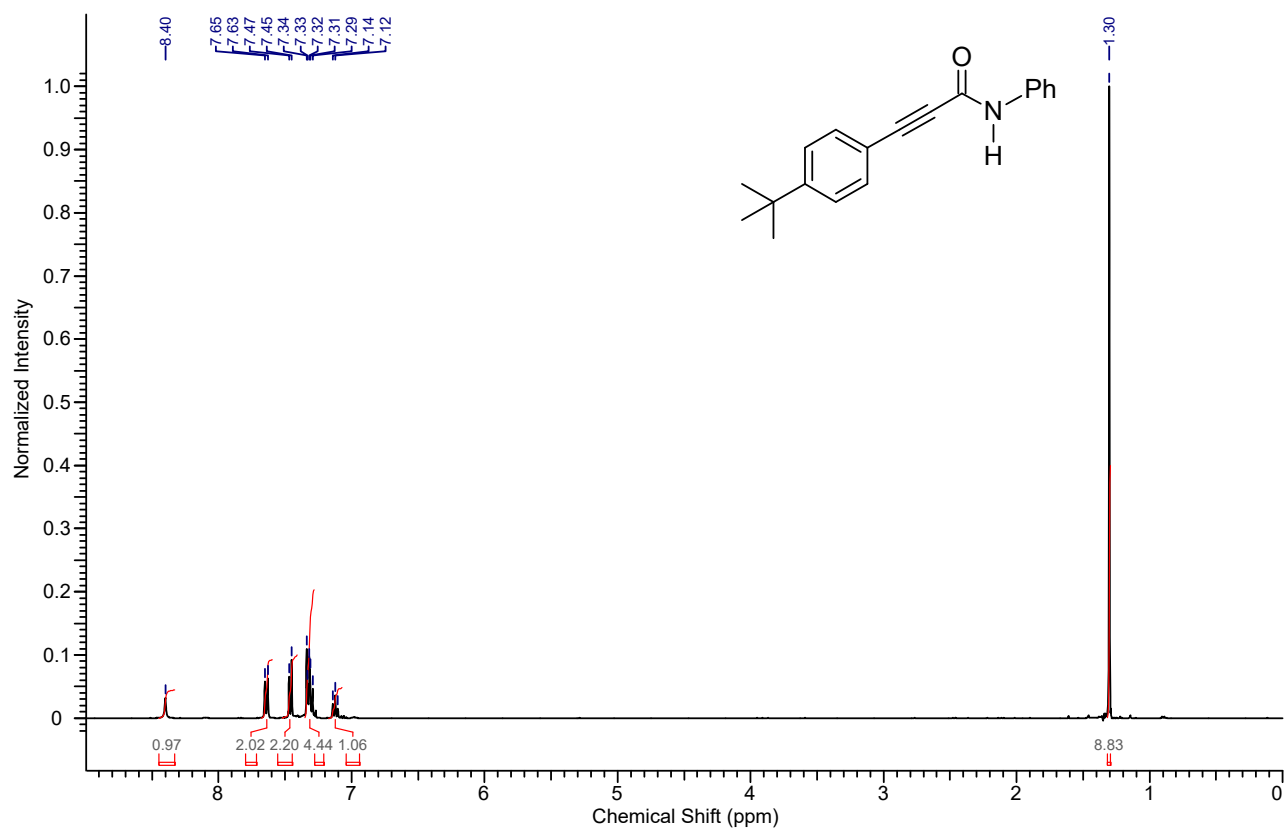

$^1\text{H}$  NMR spectrum of the compound **4da**

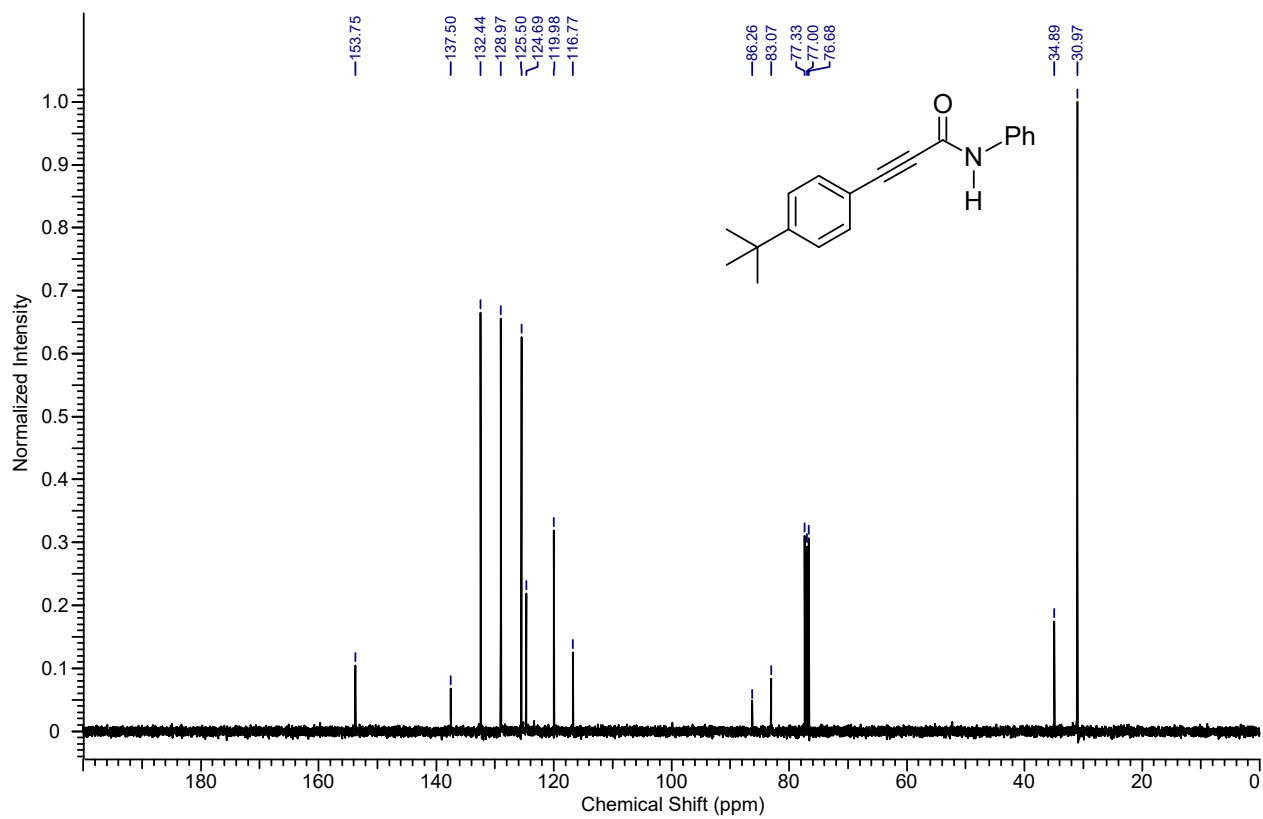

$^{13}\text{C}$  NMR spectrum of the compound **4da**

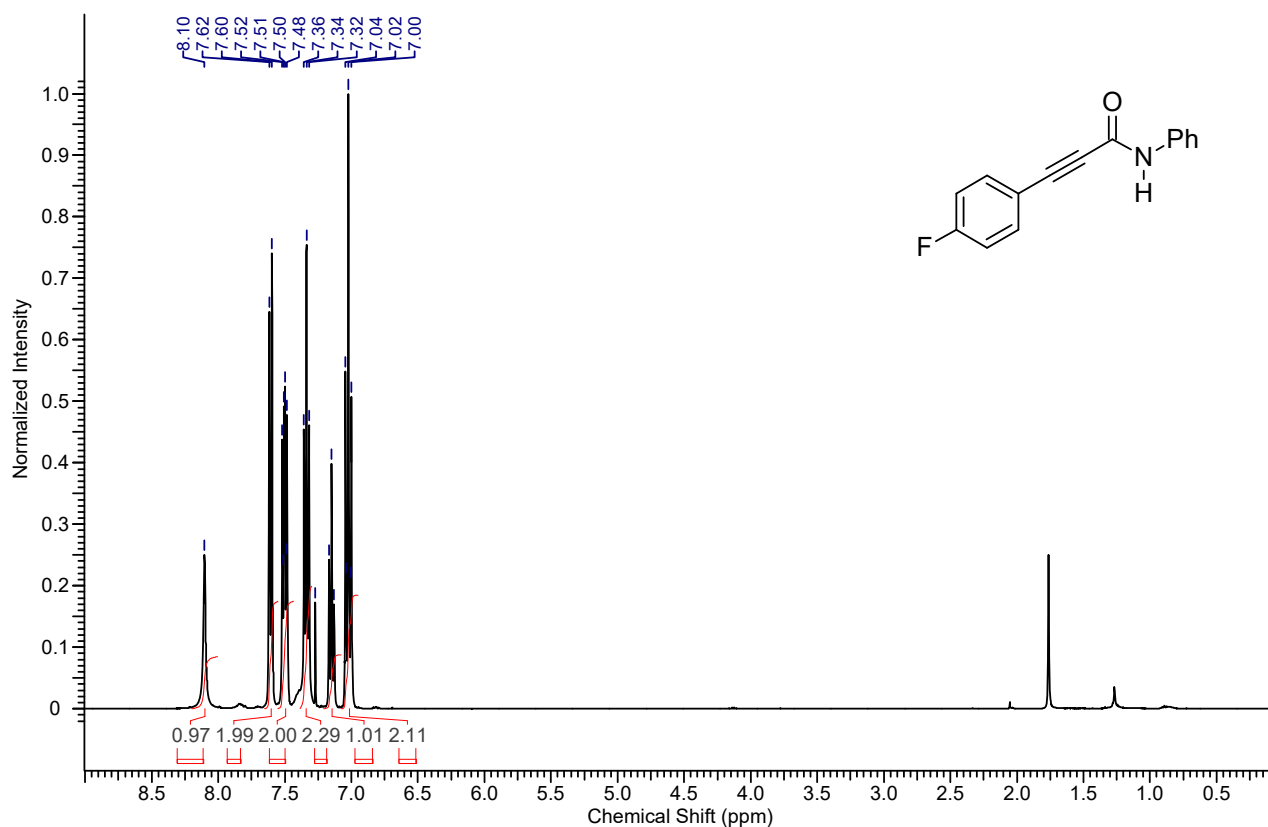

<sup>1</sup>H NMR spectrum of the compound 4ea

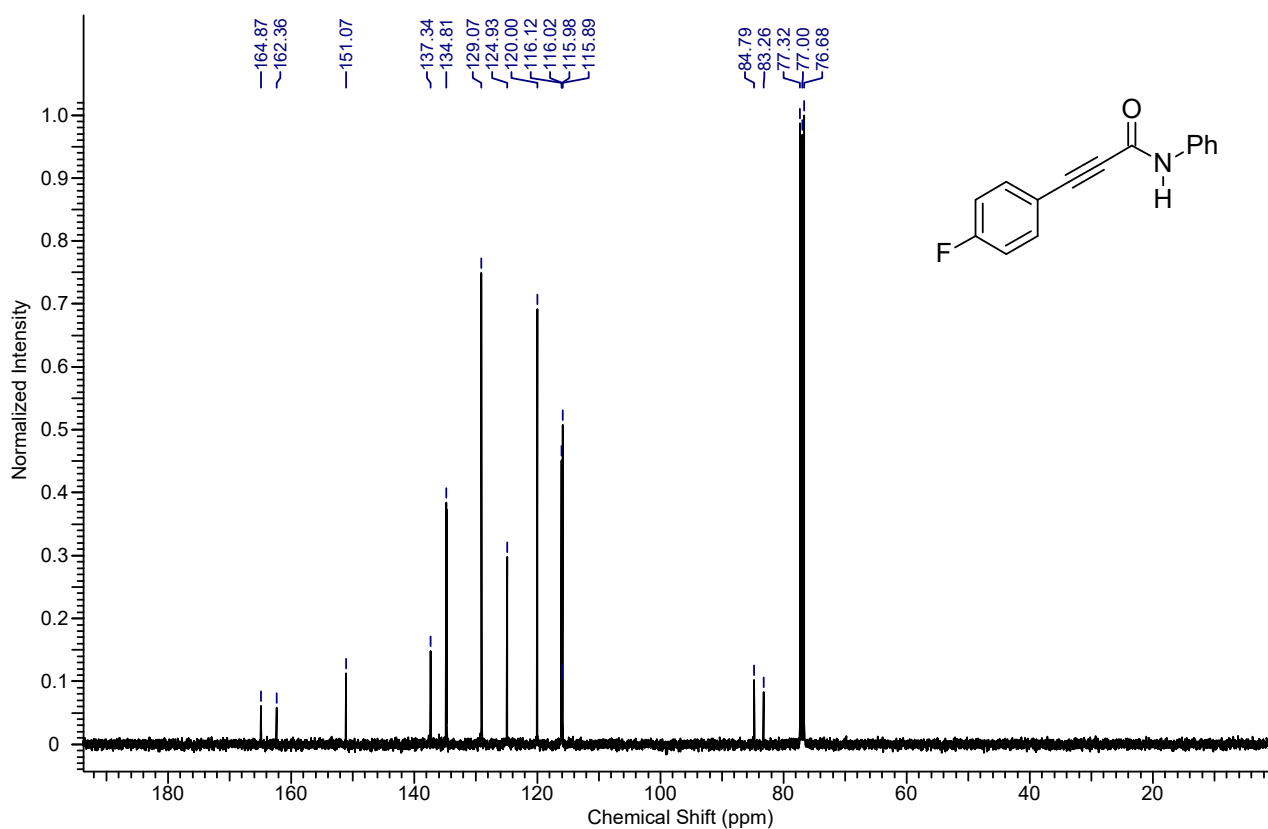

<sup>13</sup>C NMR spectrum of the compound 4ea

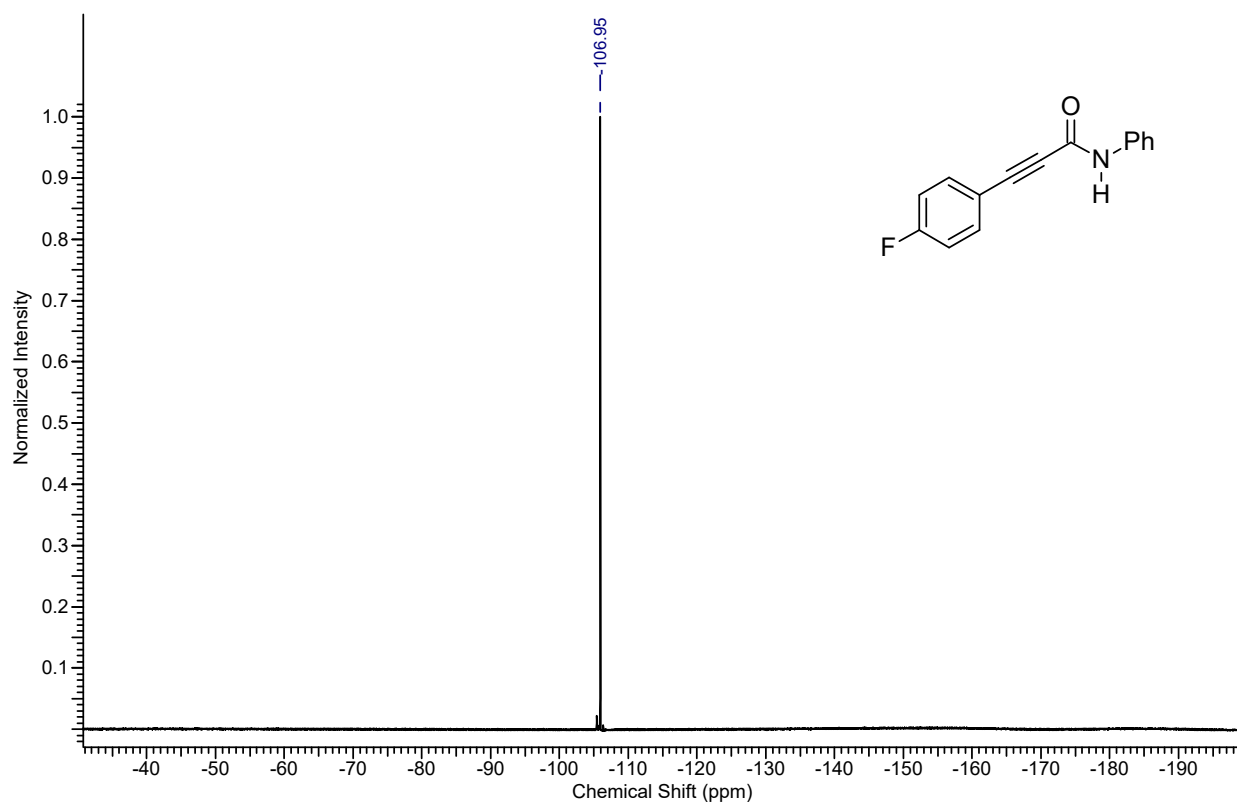

<sup>19</sup>F NMR spectrum of the compound **4ea**

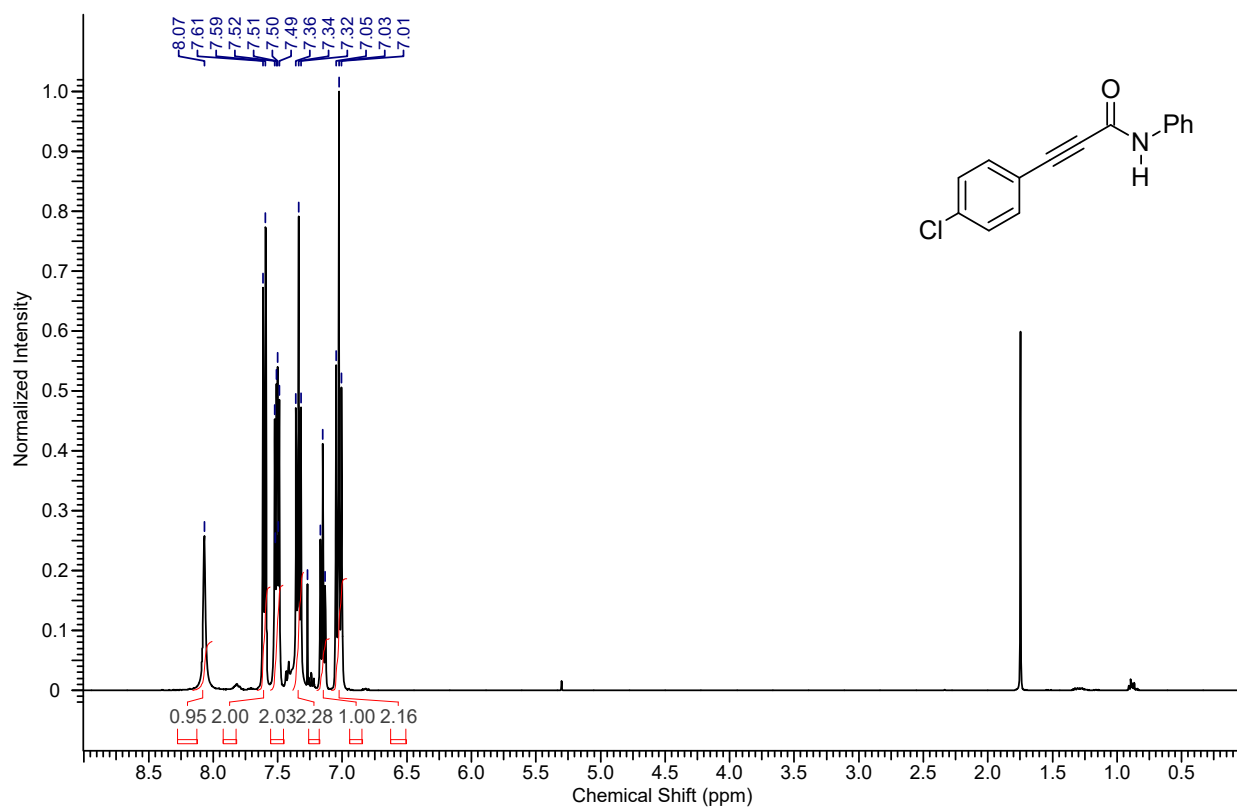

<sup>1</sup>H NMR spectrum of the compound **4fa**

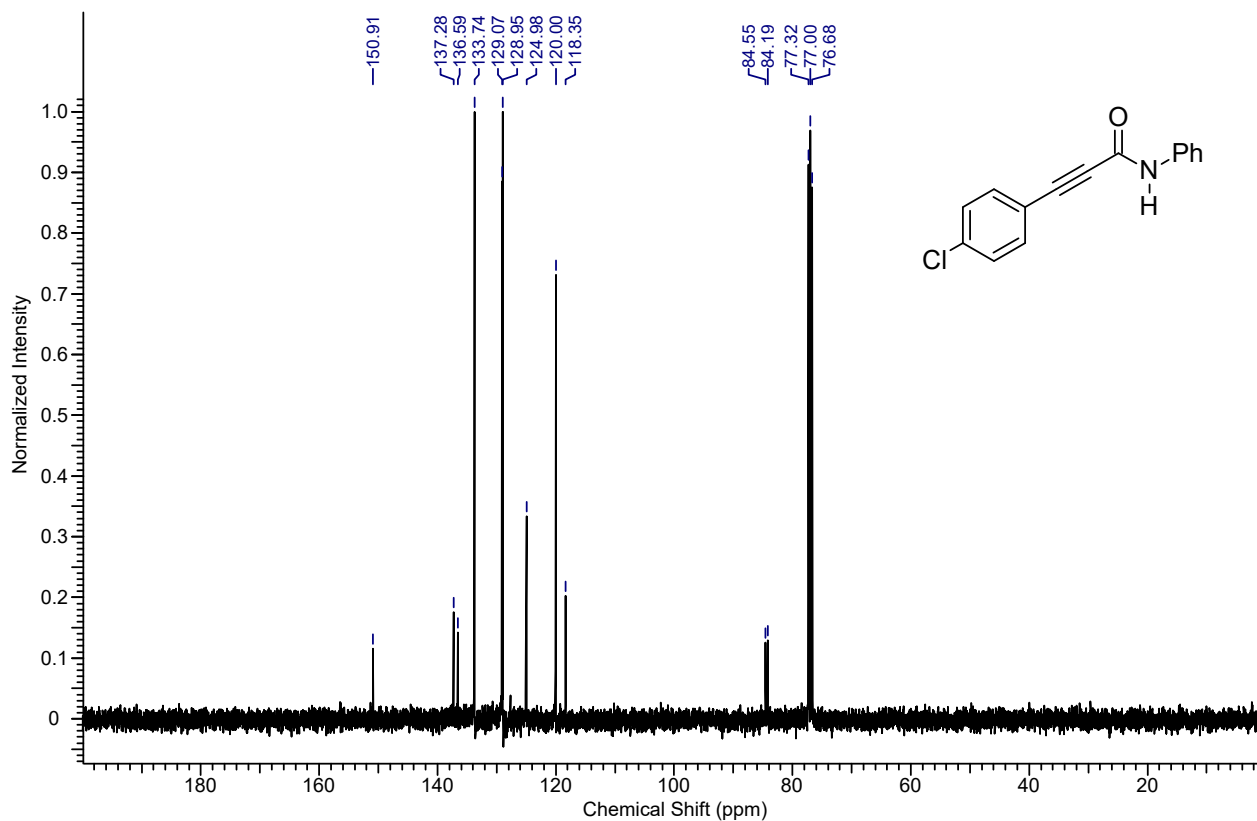

<sup>13</sup>C NMR spectrum of the compound **4fa**

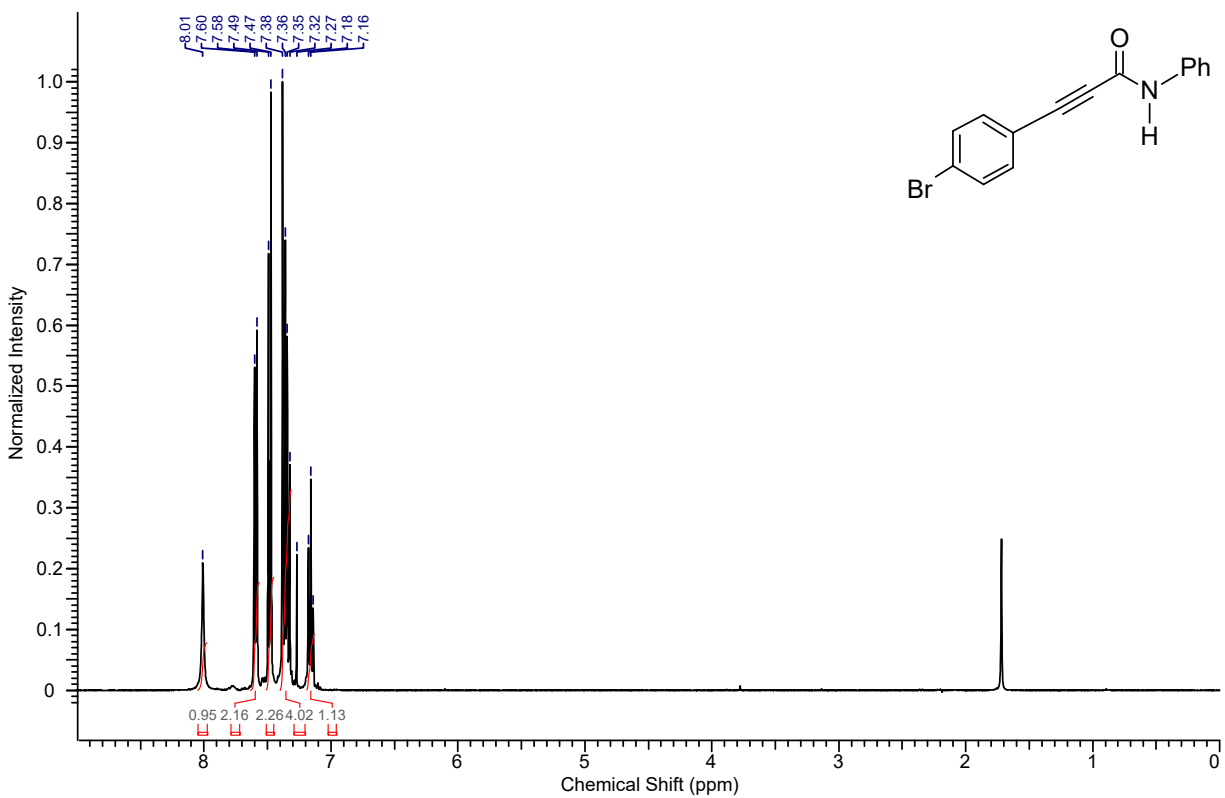

<sup>1</sup>H NMR spectrum of the compound **4ga**

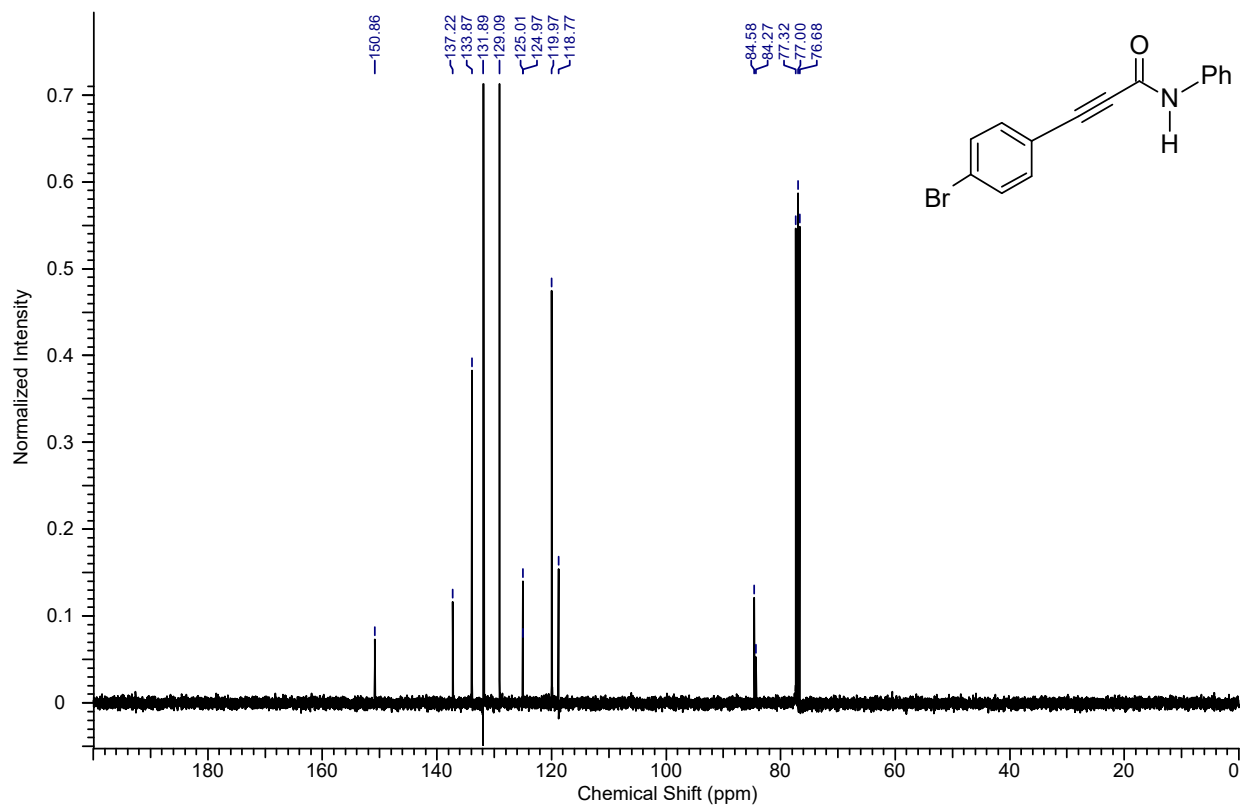

<sup>13</sup>C NMR spectrum of the compound **4ga**

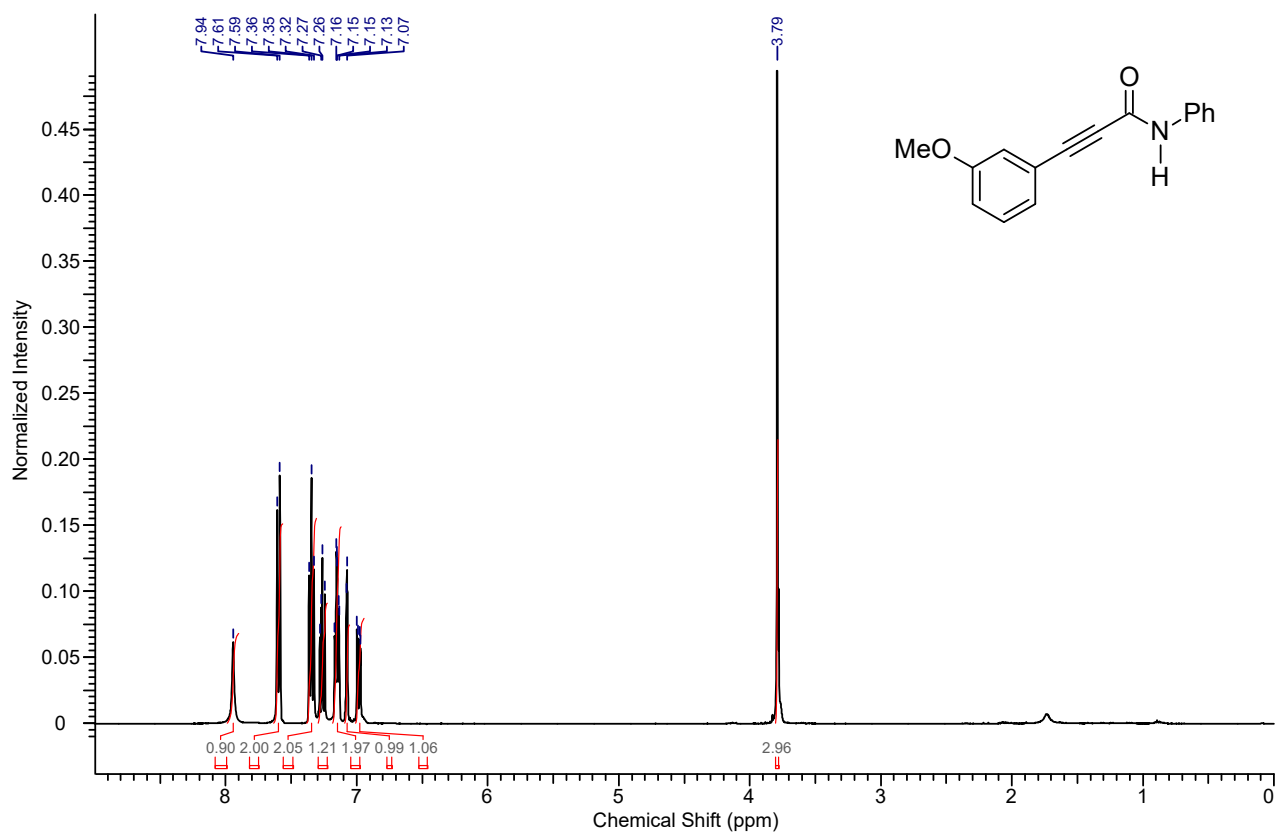

<sup>1</sup>H NMR spectrum of the compound **4ka**

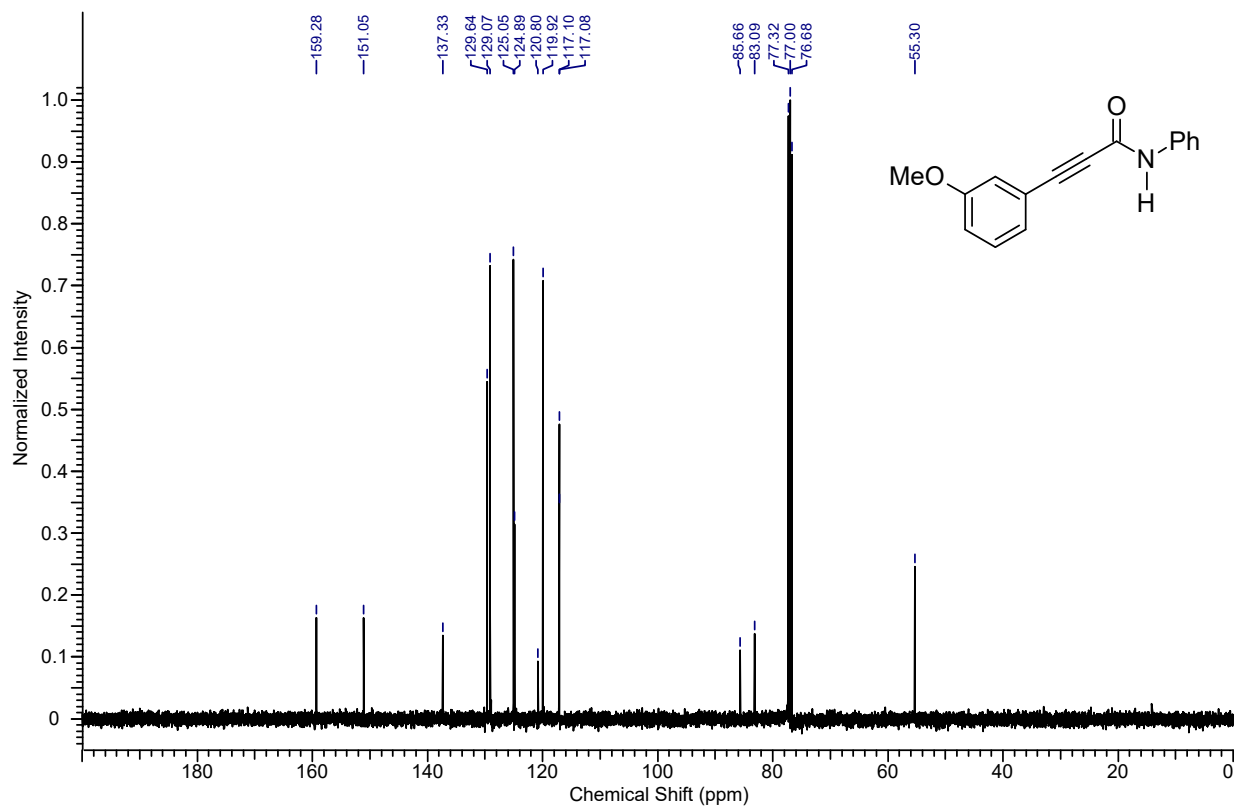

<sup>13</sup>C NMR spectrum of the compound **4ka**

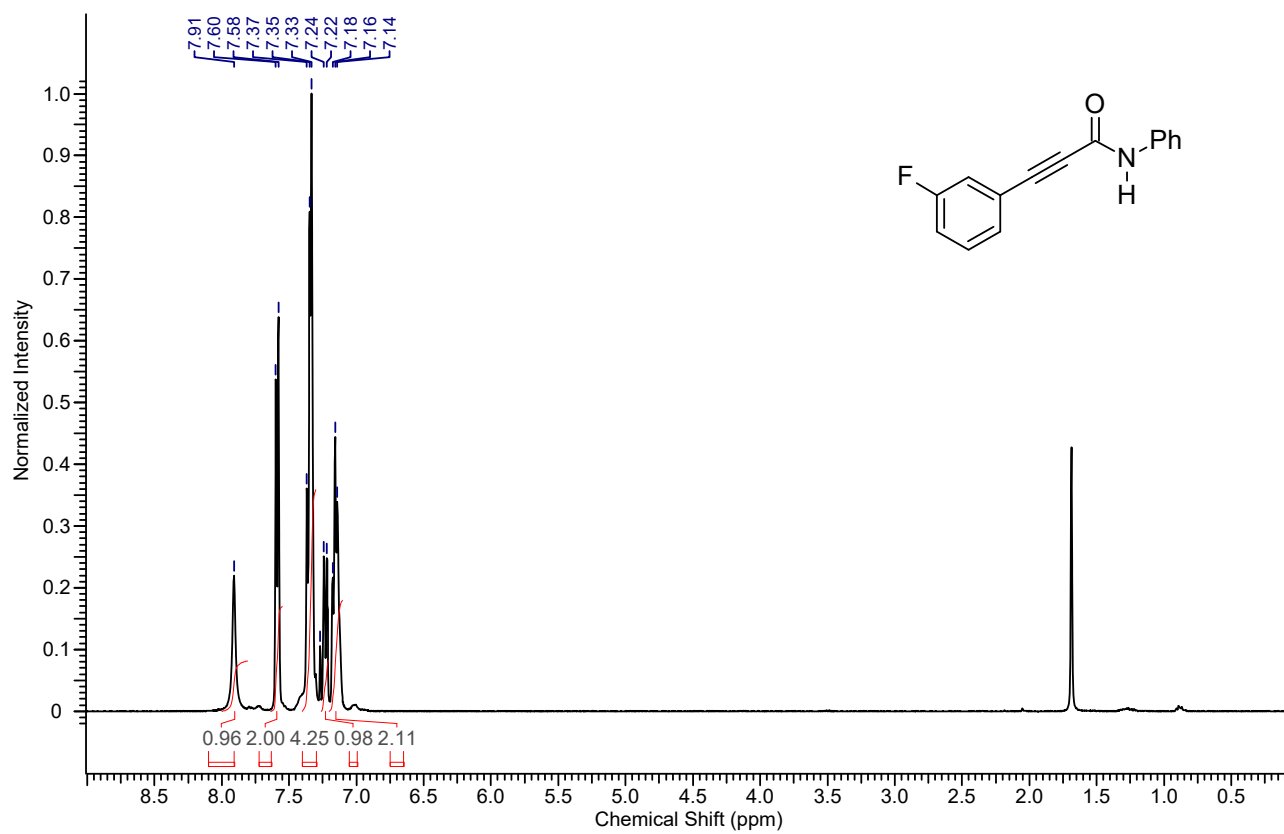

<sup>1</sup>H NMR spectrum of the compound **4la**

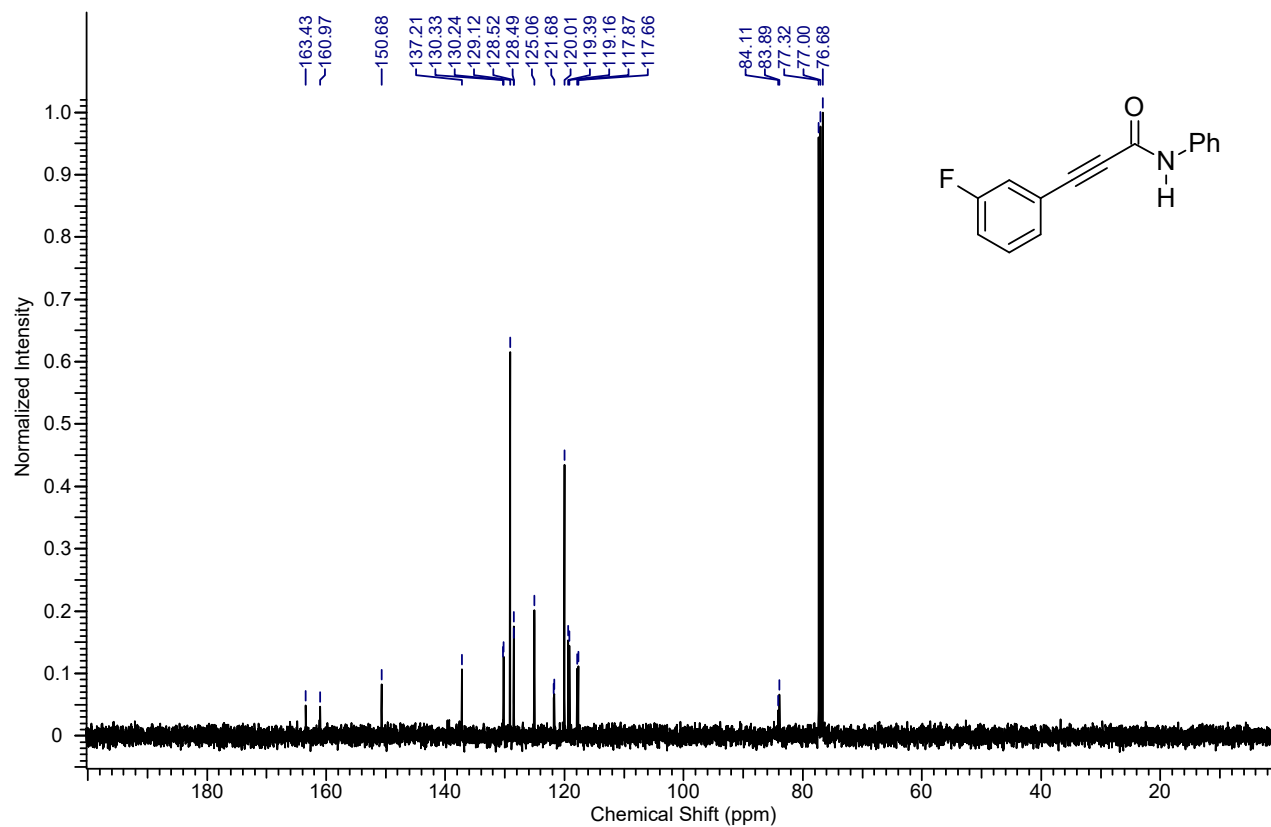

<sup>13</sup>C NMR spectrum of the compound 4a

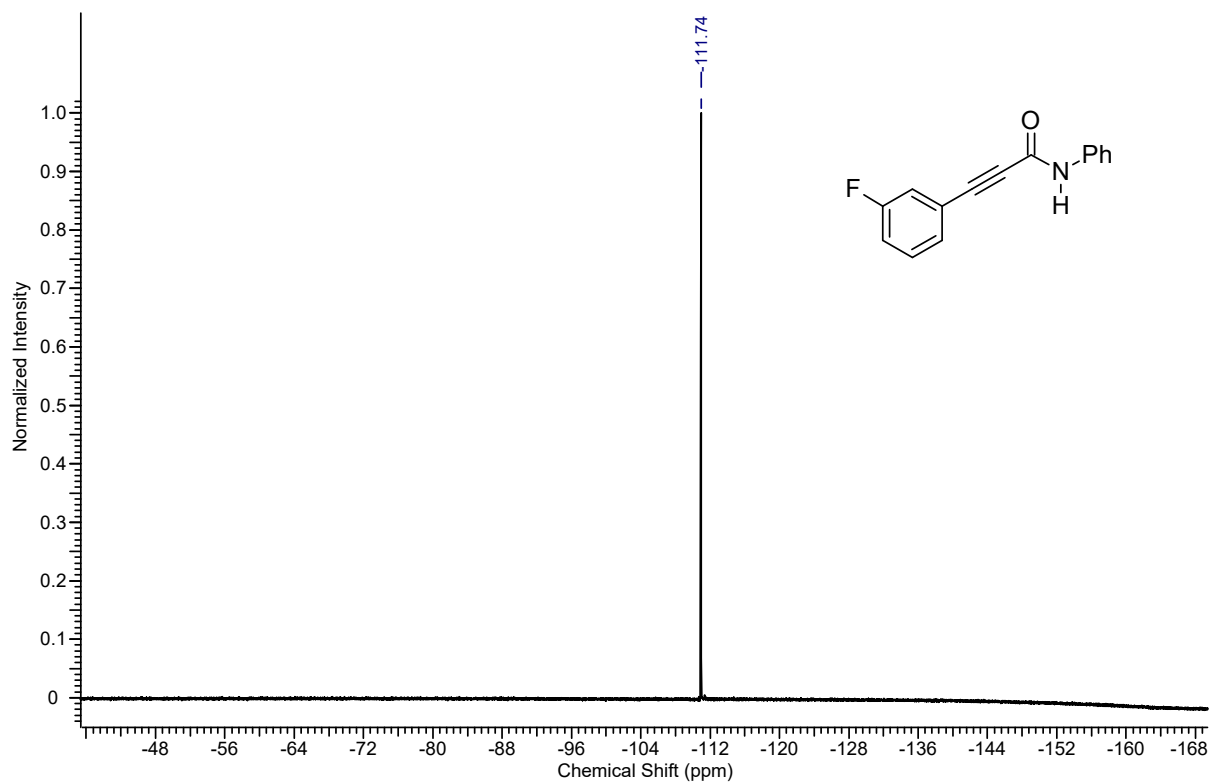

<sup>19</sup>F NMR spectrum of the compound 4a

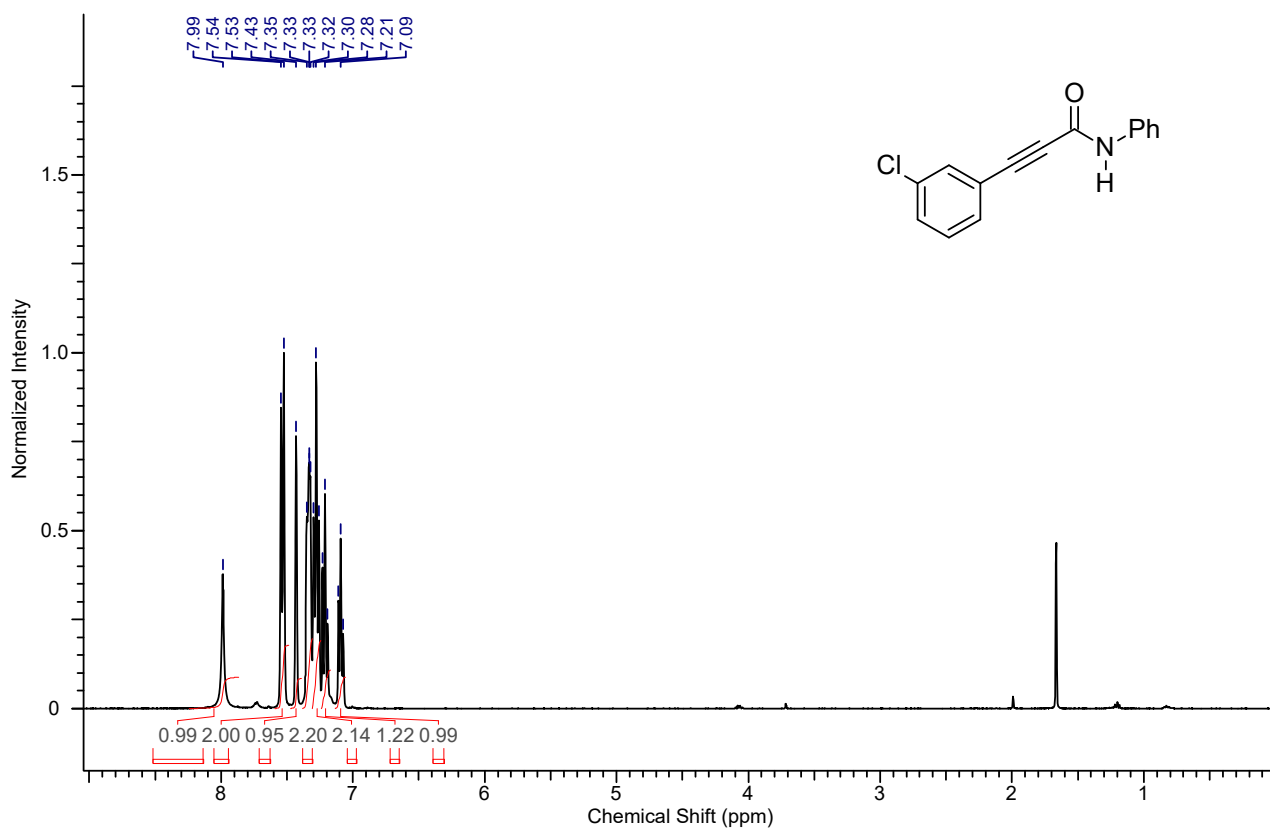

<sup>1</sup>H NMR spectrum of the compound **4ma**

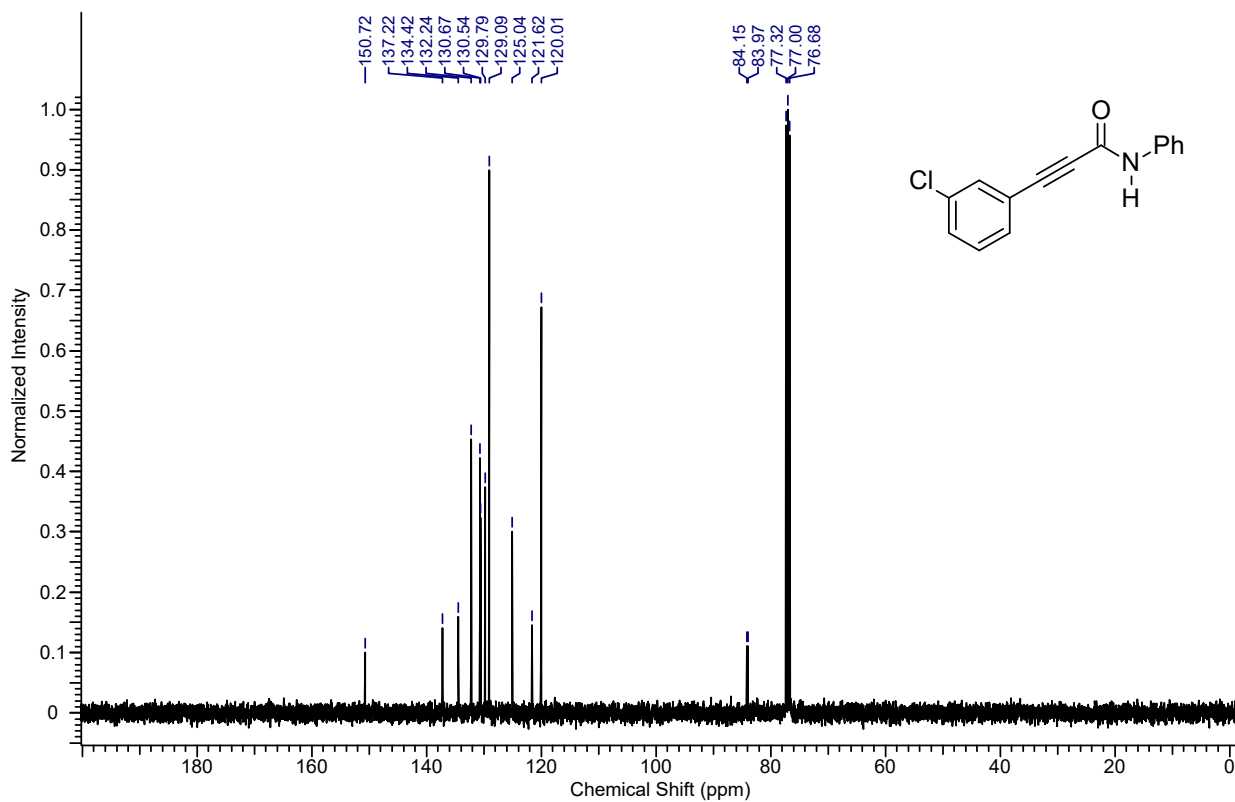

<sup>13</sup>C NMR spectrum of the compound **4ma**



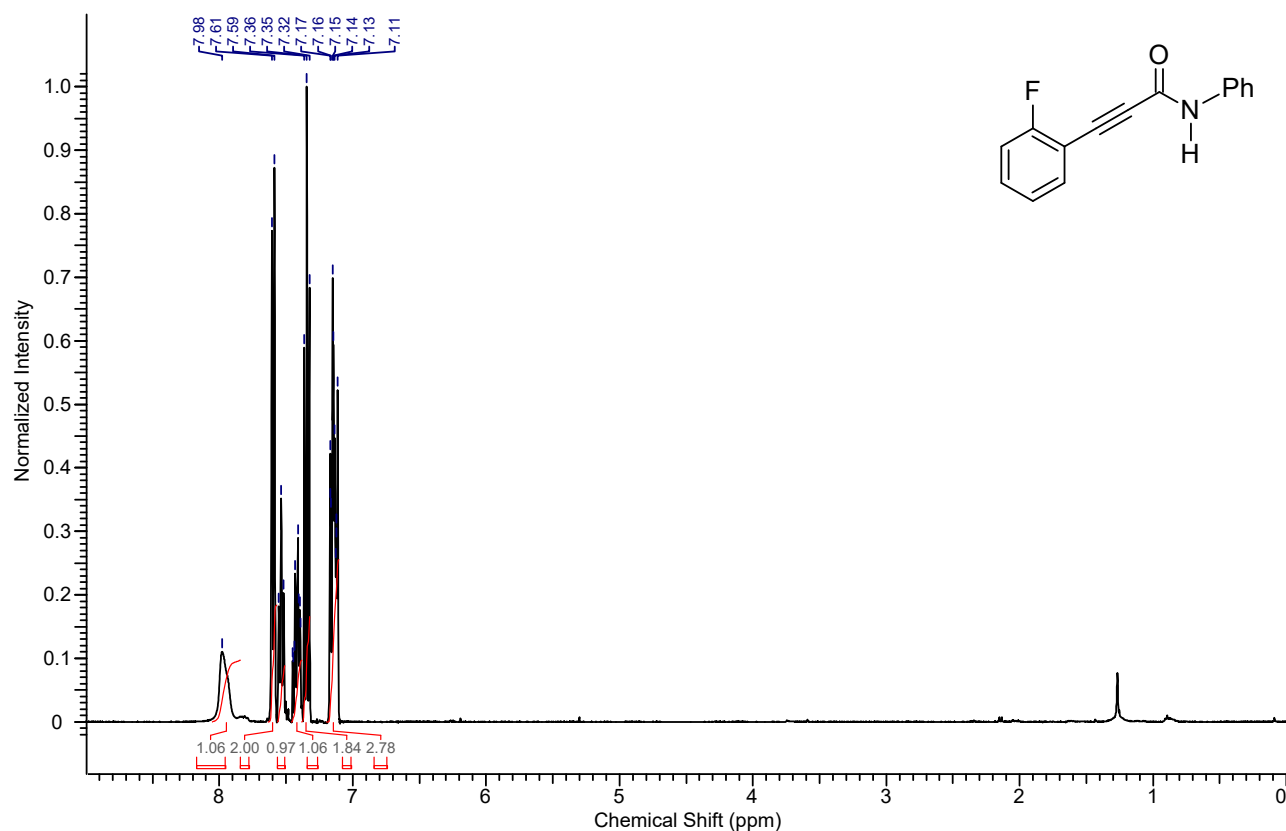

<sup>1</sup>H NMR spectrum of the compound **4na**

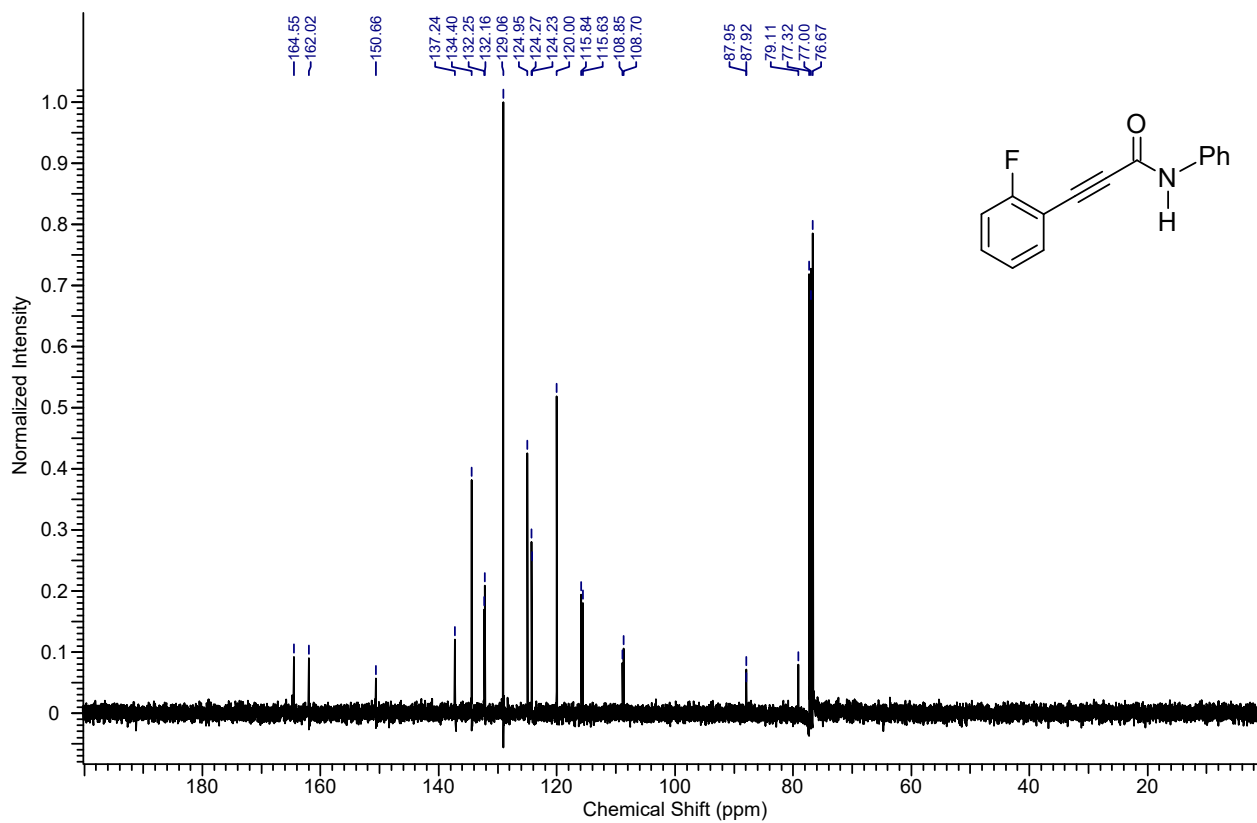

<sup>13</sup>C NMR spectrum of the compound **4na**

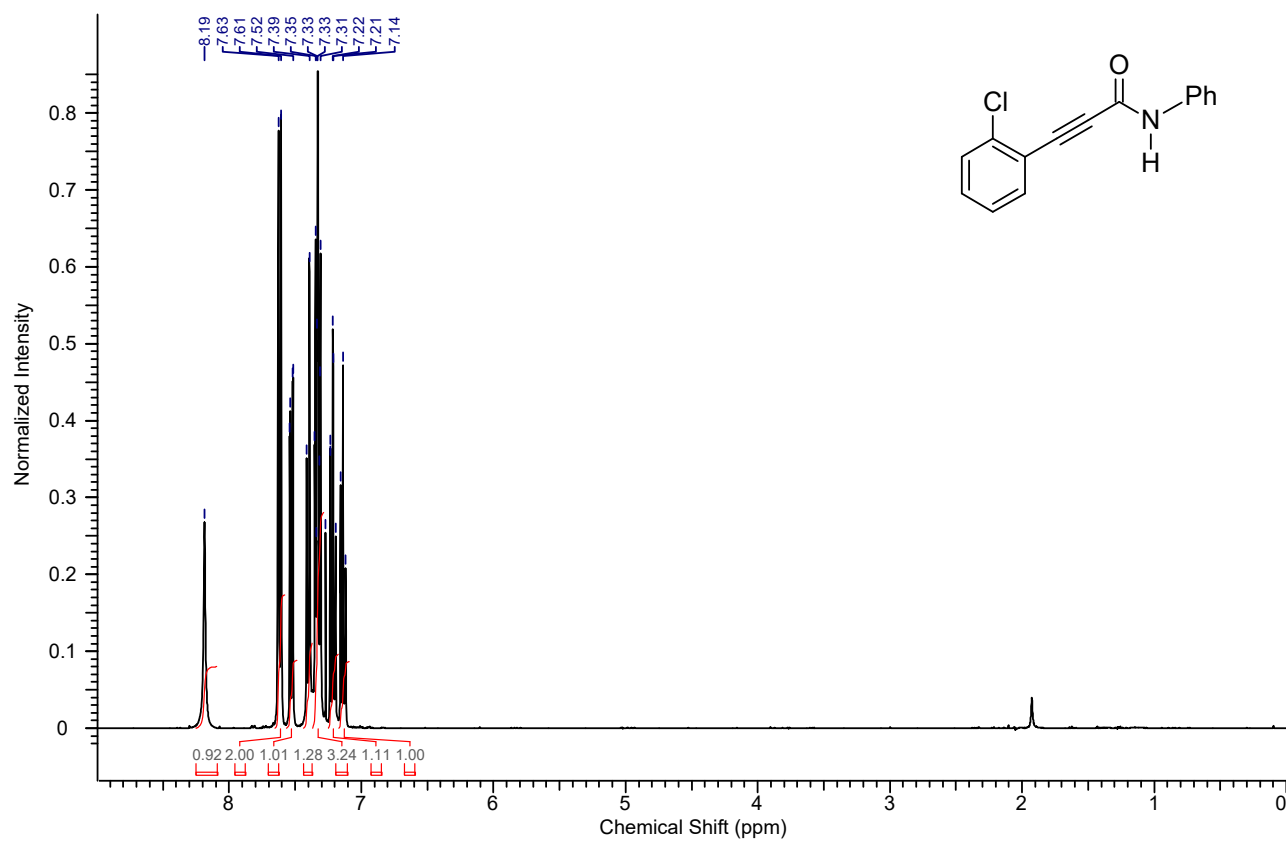

<sup>1</sup>H NMR spectrum of the compound 40a

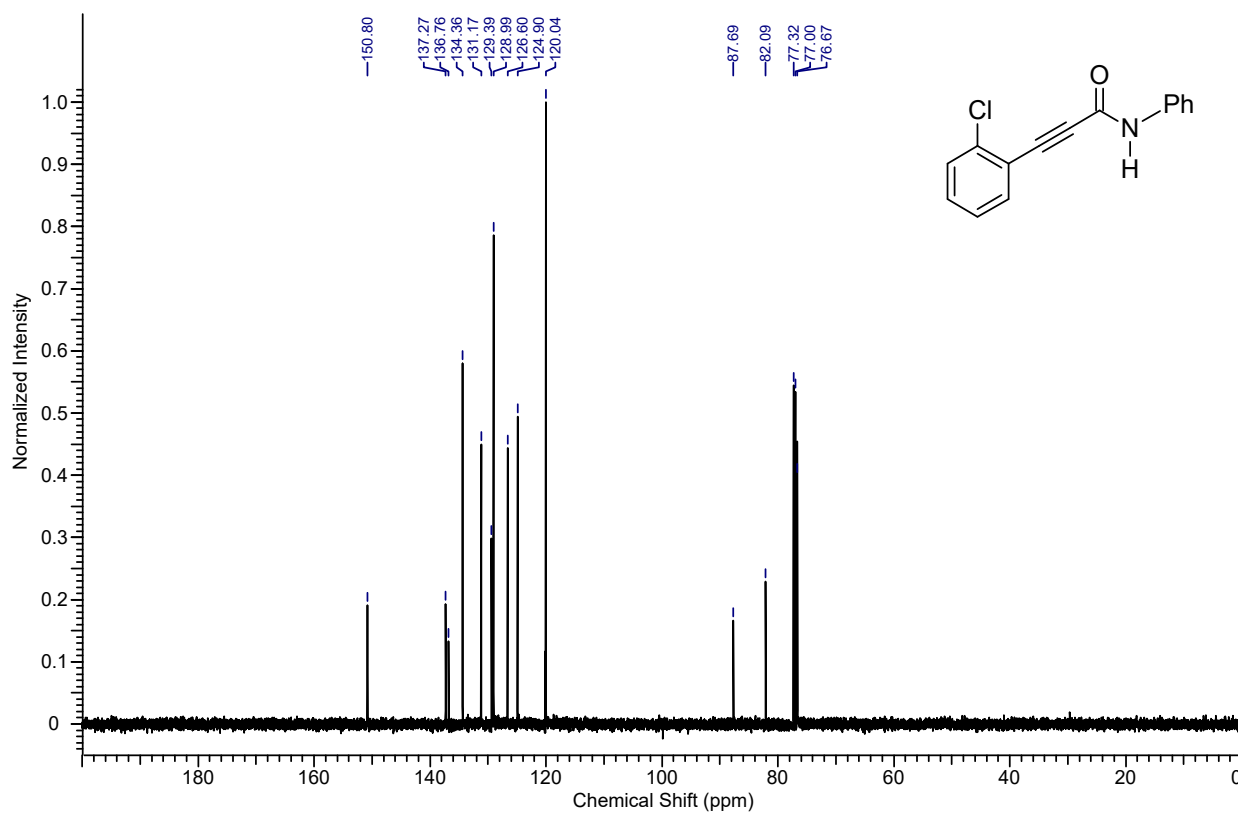

<sup>13</sup>C NMR spectrum of the compound 40a

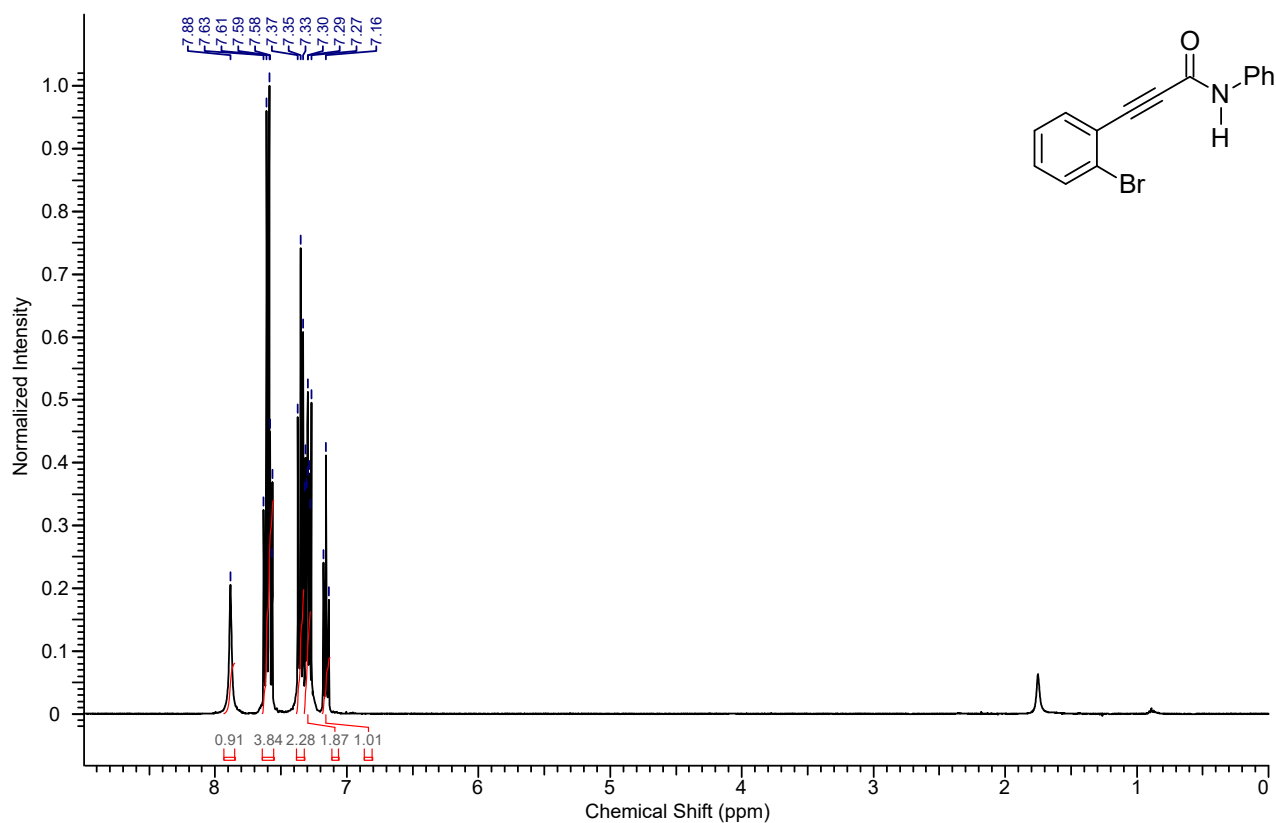

<sup>1</sup>H NMR spectrum of the compound 4pa

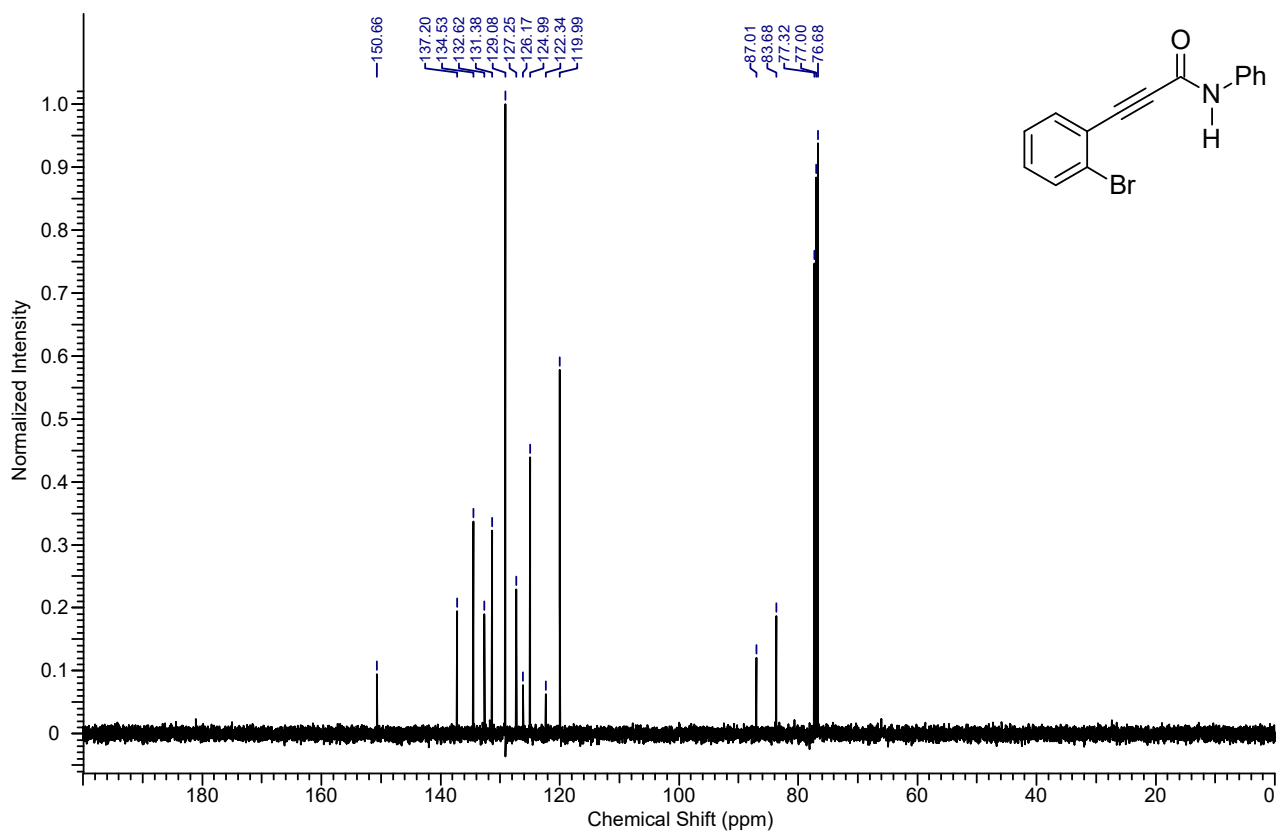

<sup>13</sup>C NMR spectrum of the compound 4pa

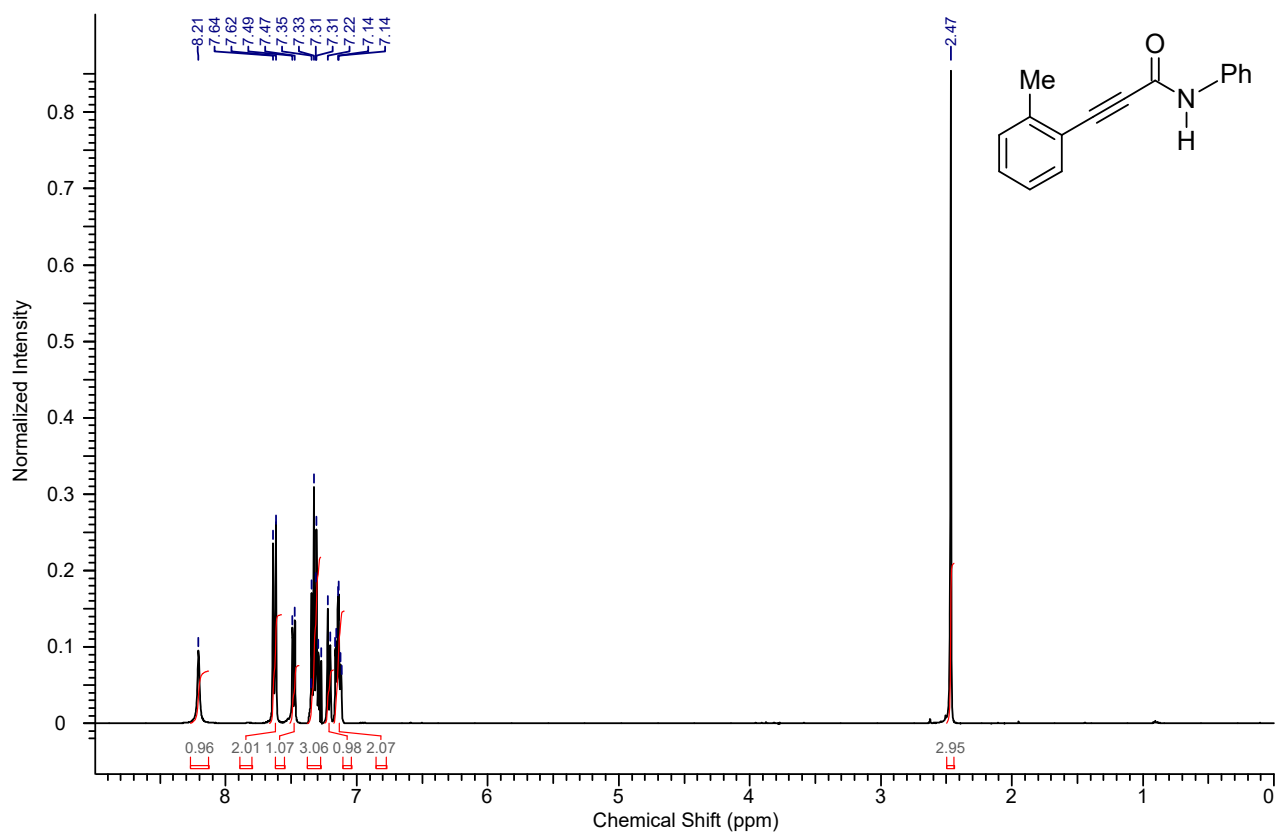

<sup>1</sup>H NMR spectrum of the compound 4qa

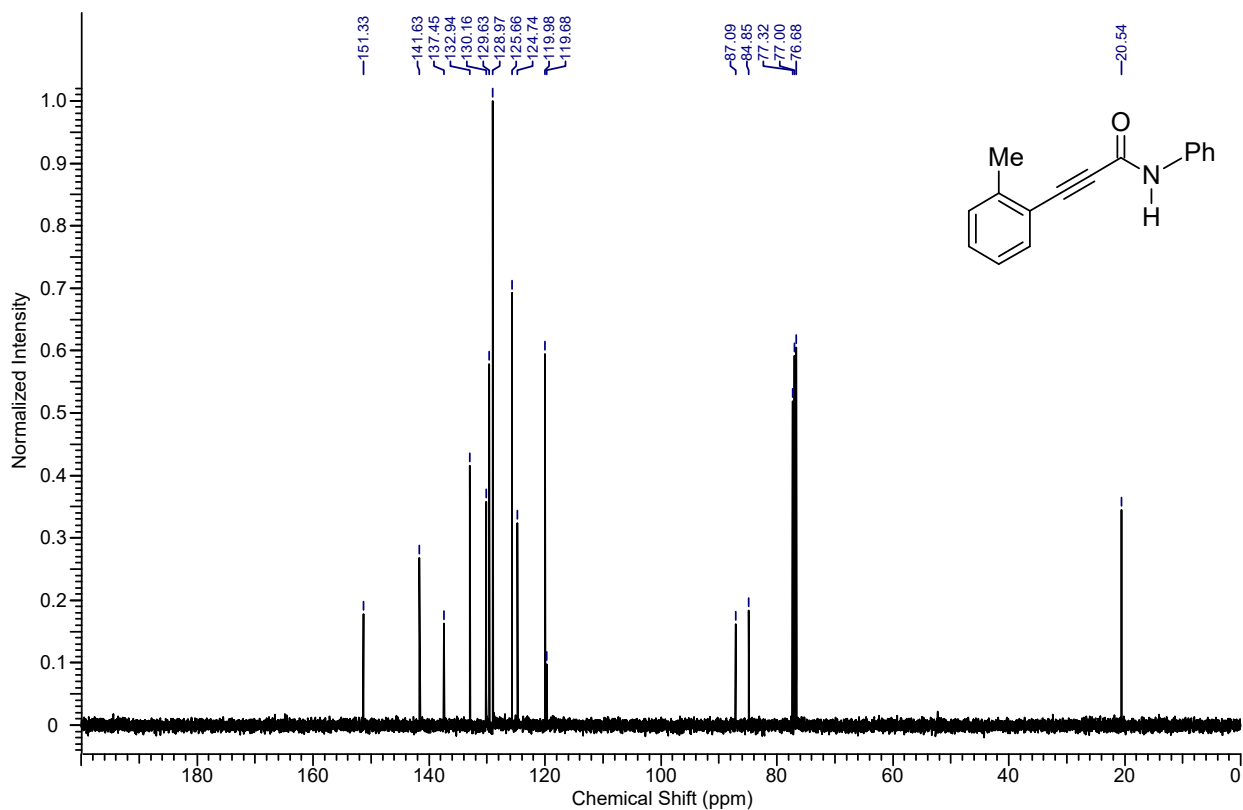

<sup>13</sup>C NMR spectrum of the compound 4qa

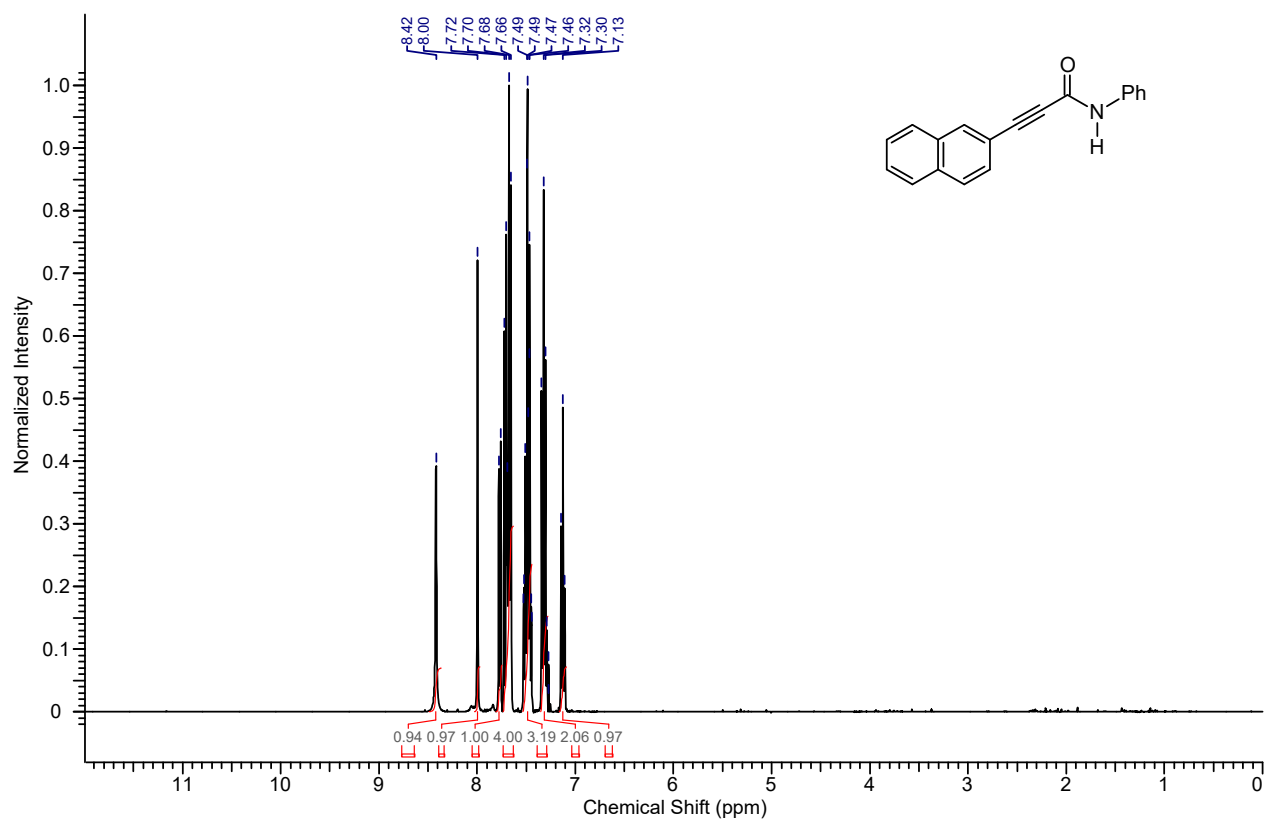

<sup>1</sup>H NMR spectrum of the compound 4ra

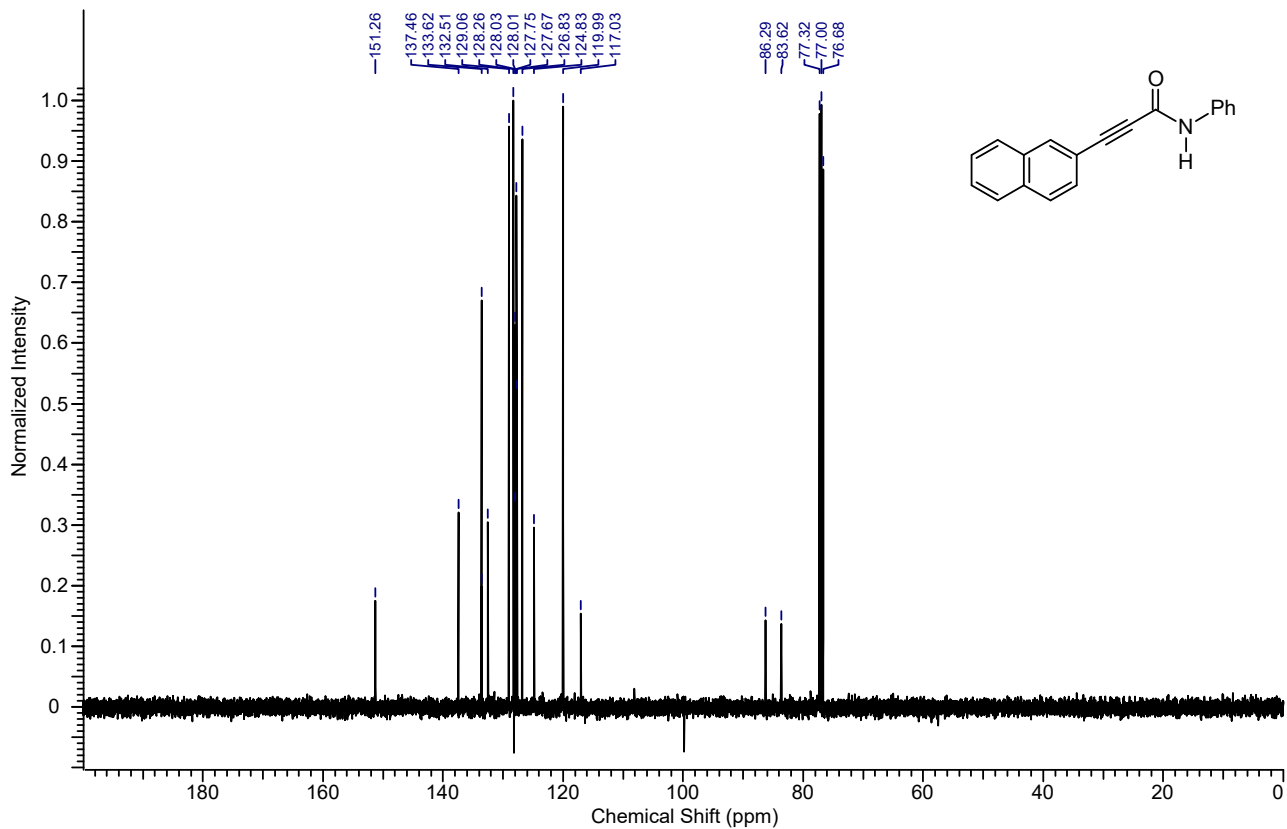

<sup>13</sup>C NMR spectrum of the compound 4ra

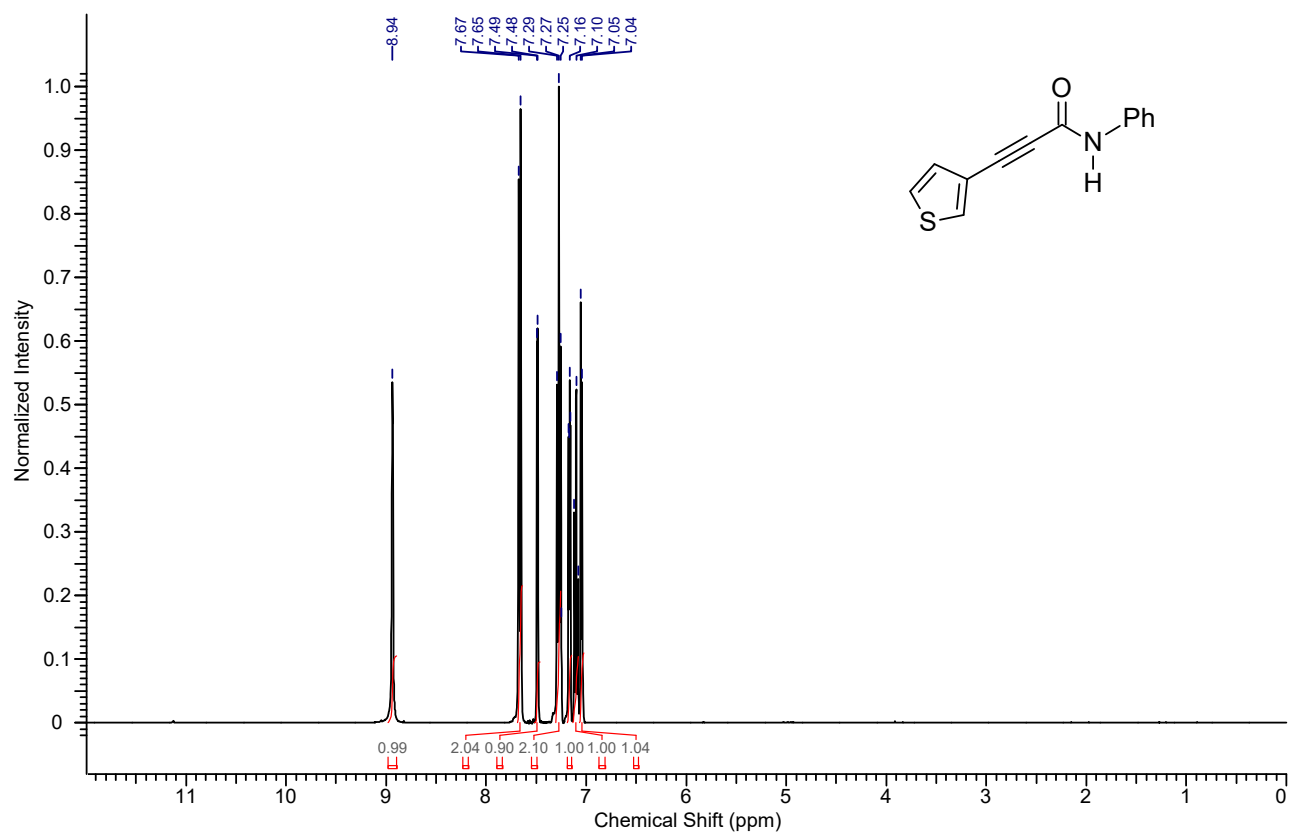

<sup>1</sup>H NMR spectrum of the compound 4sa

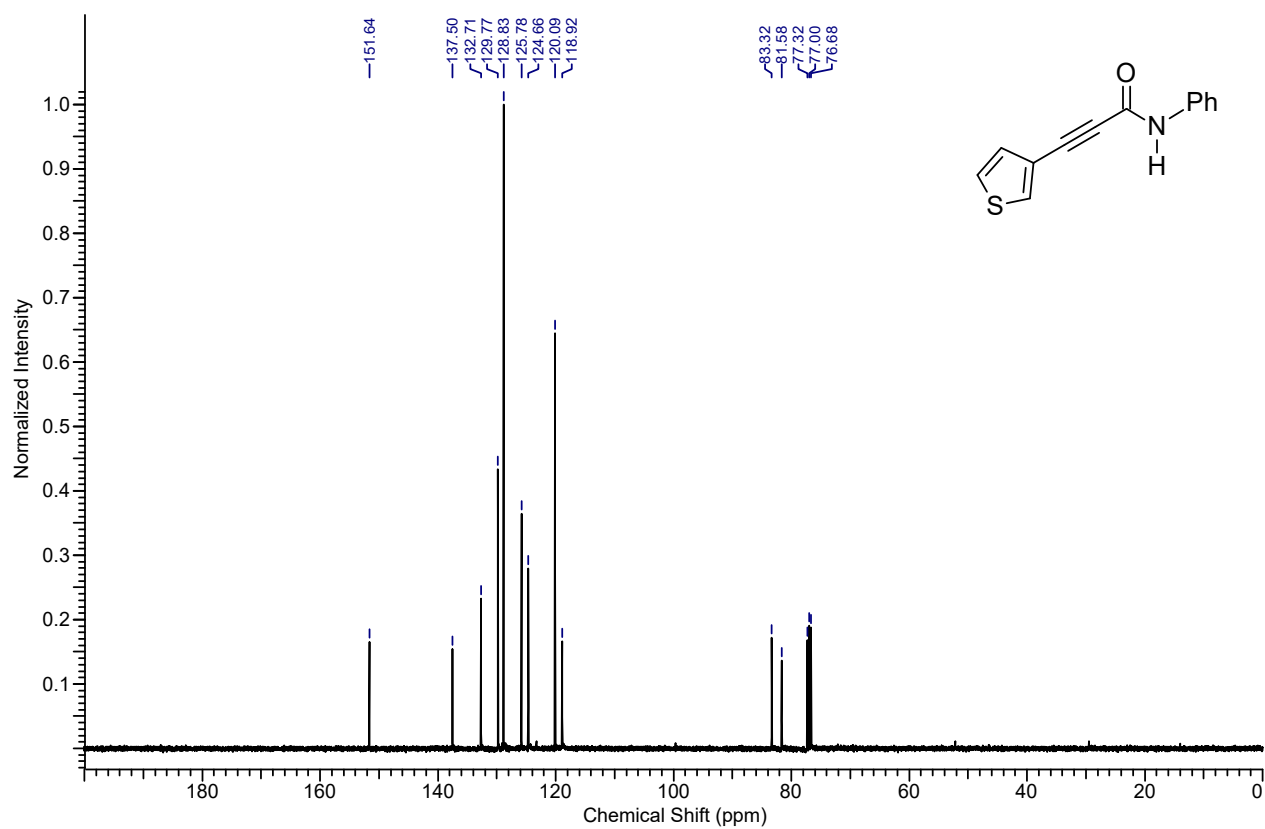

<sup>13</sup>C NMR spectrum of the compound 4sa

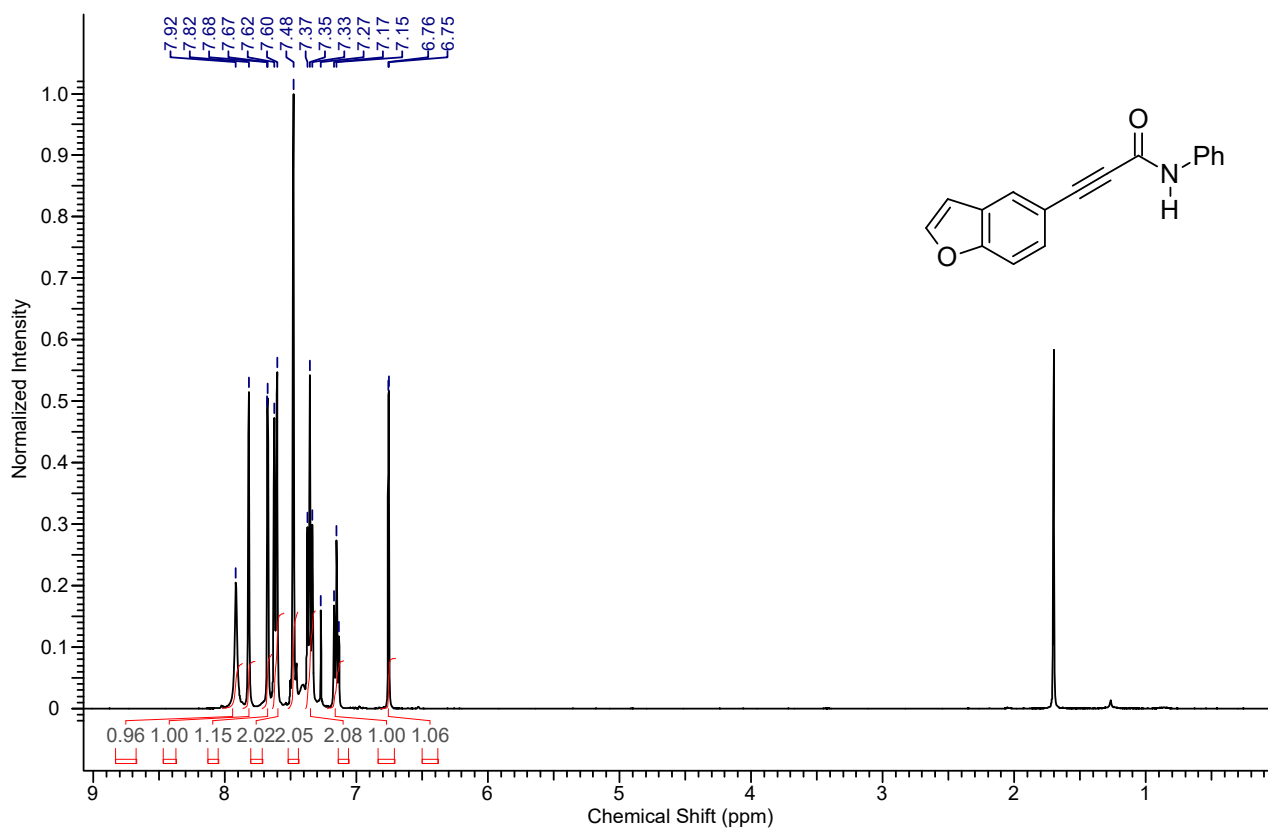

<sup>1</sup>H NMR spectrum of the compound 4ta

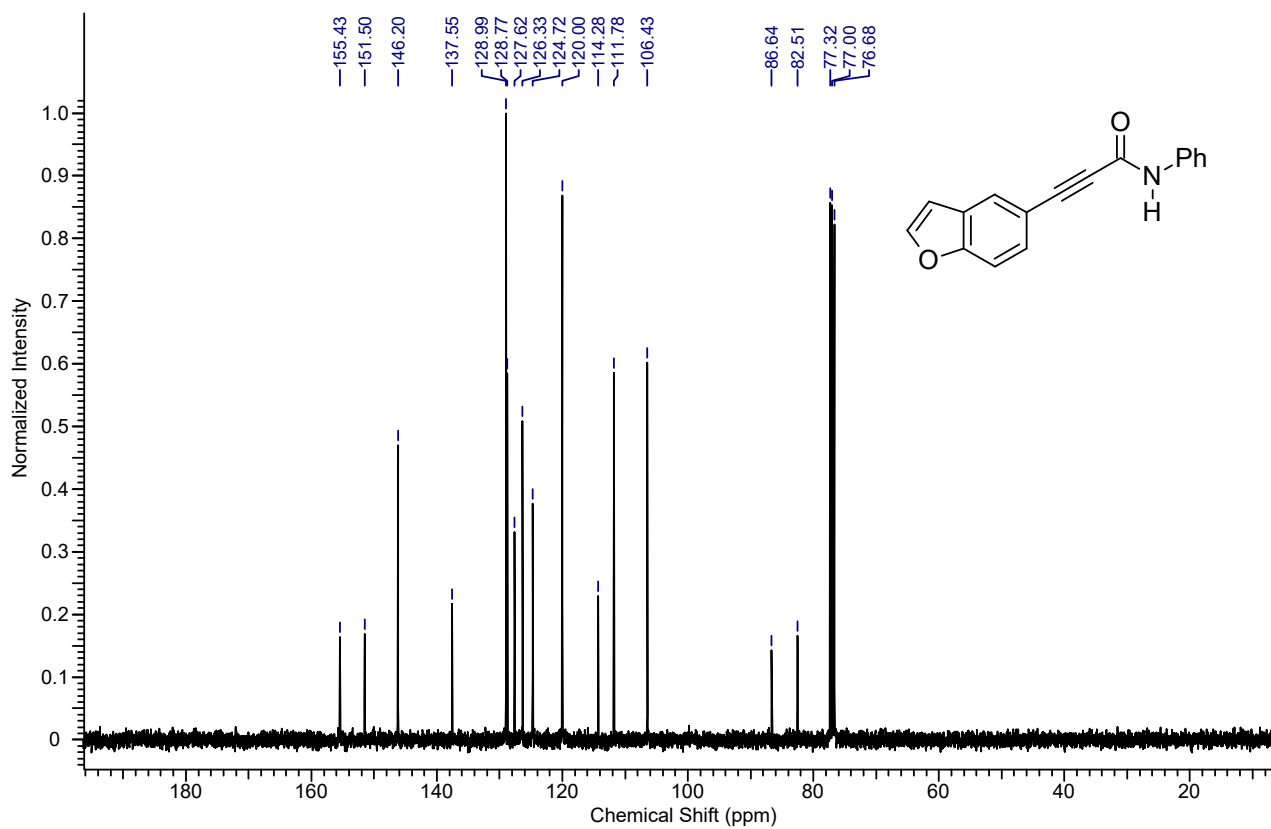

<sup>13</sup>C NMR spectrum of the compound 4ta

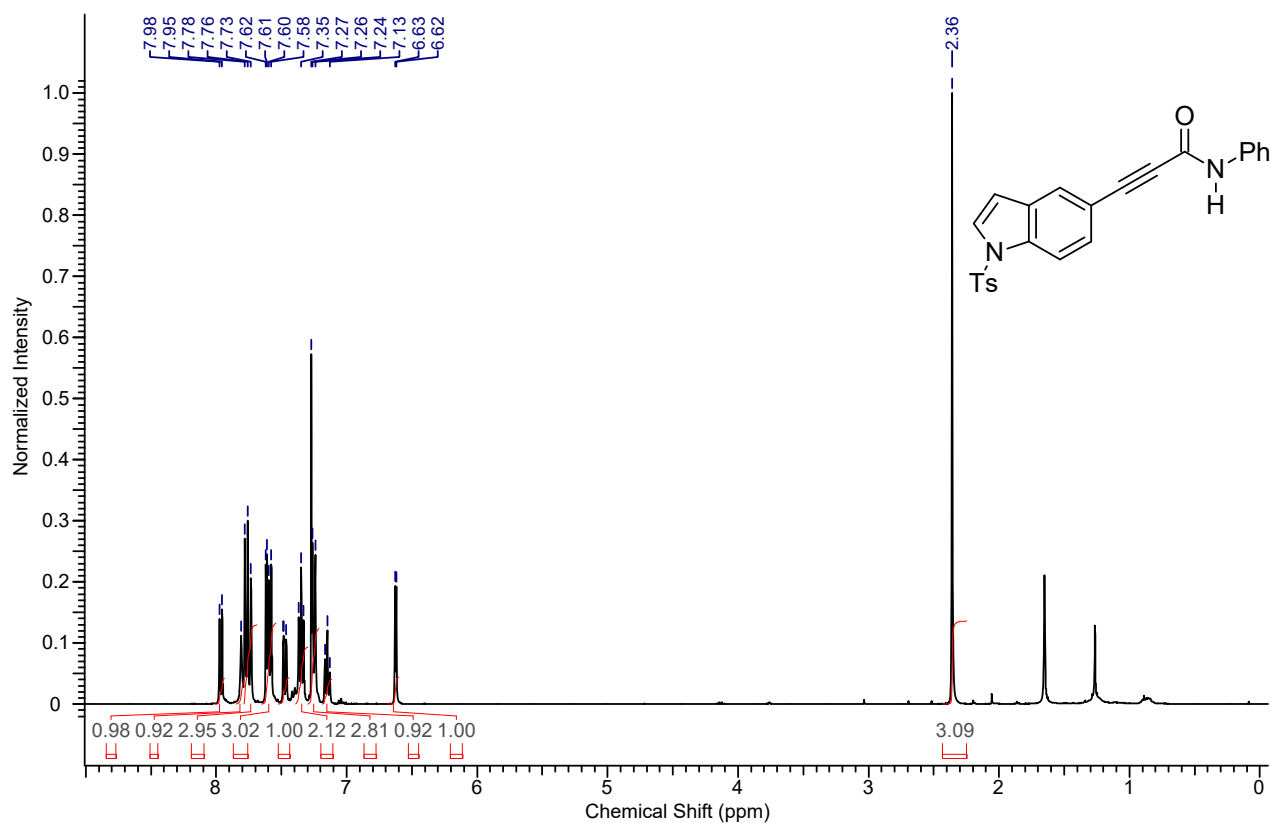

<sup>1</sup>H NMR spectrum of the compound 4ua

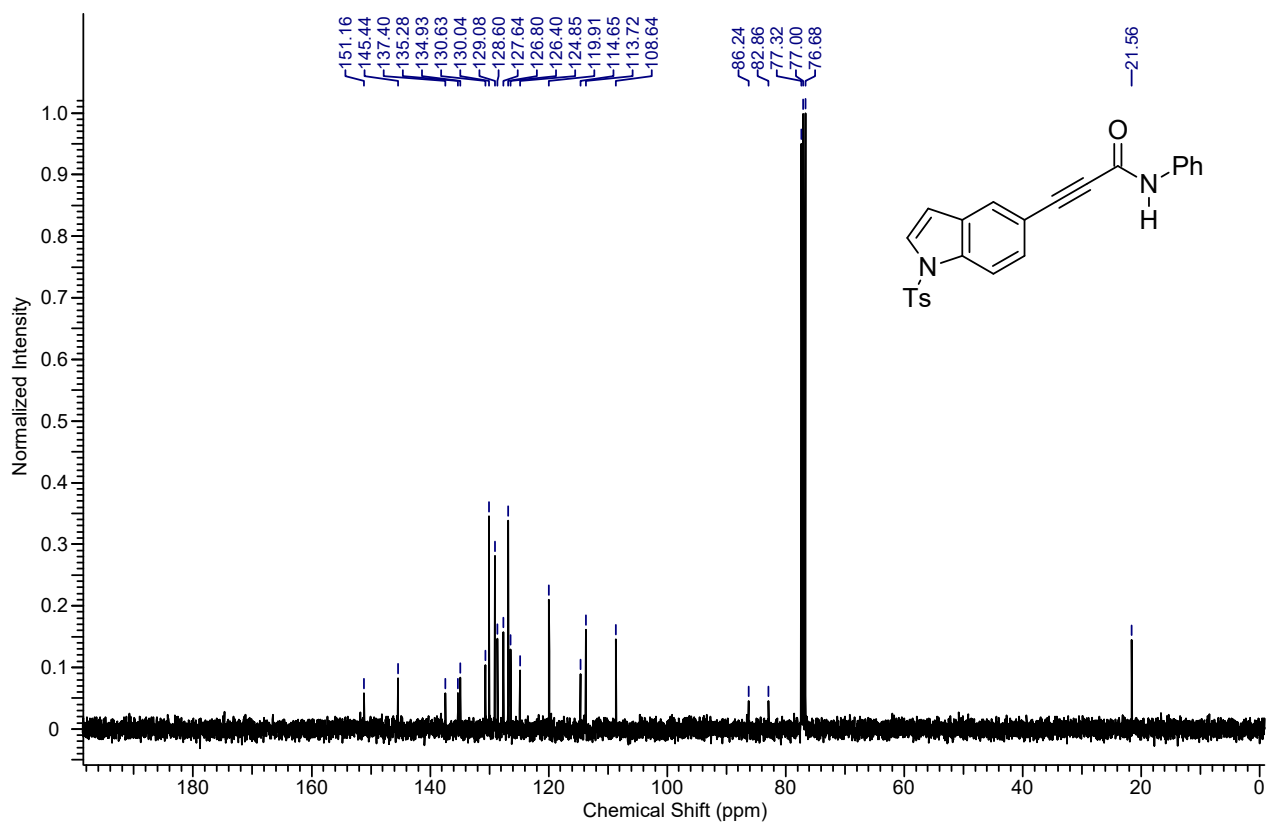

<sup>13</sup>C NMR spectrum of the compound 4ua



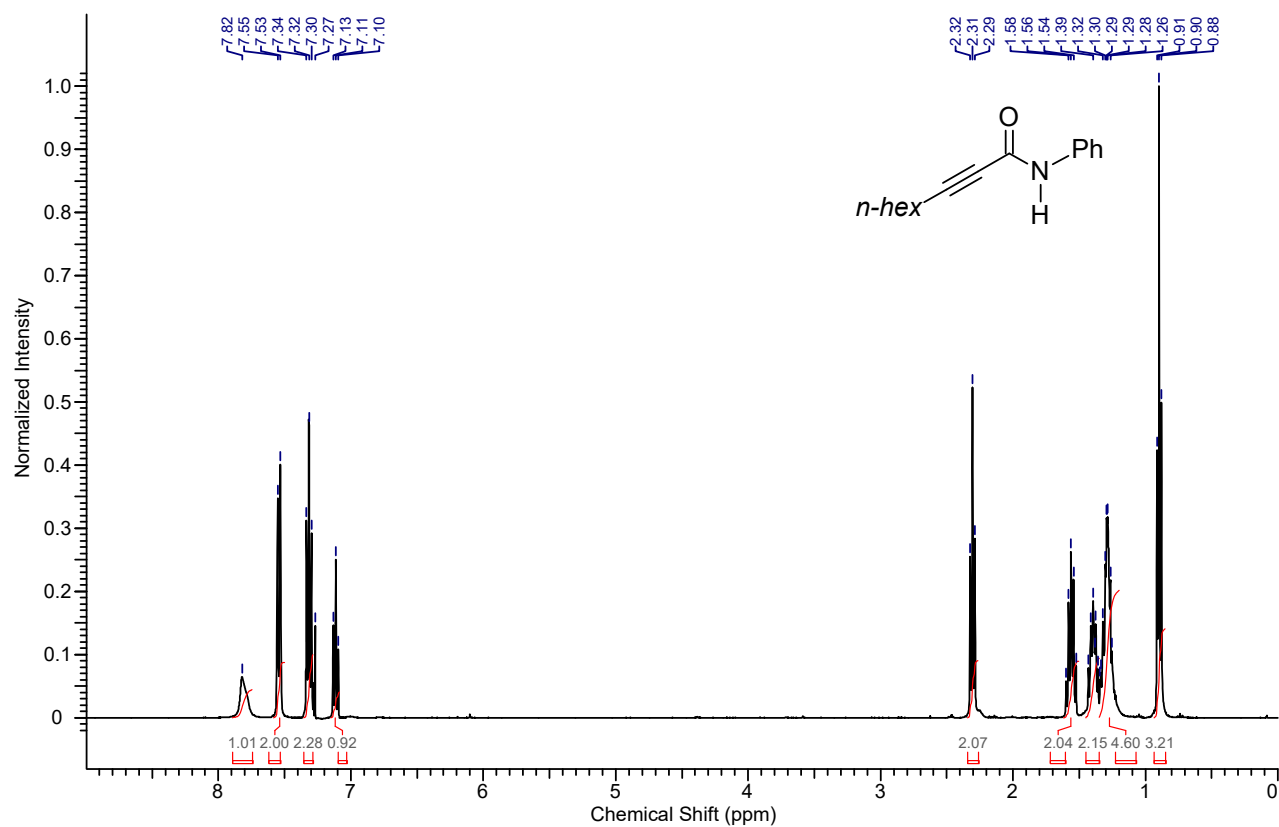

<sup>1</sup>H NMR spectrum of the compound 7a

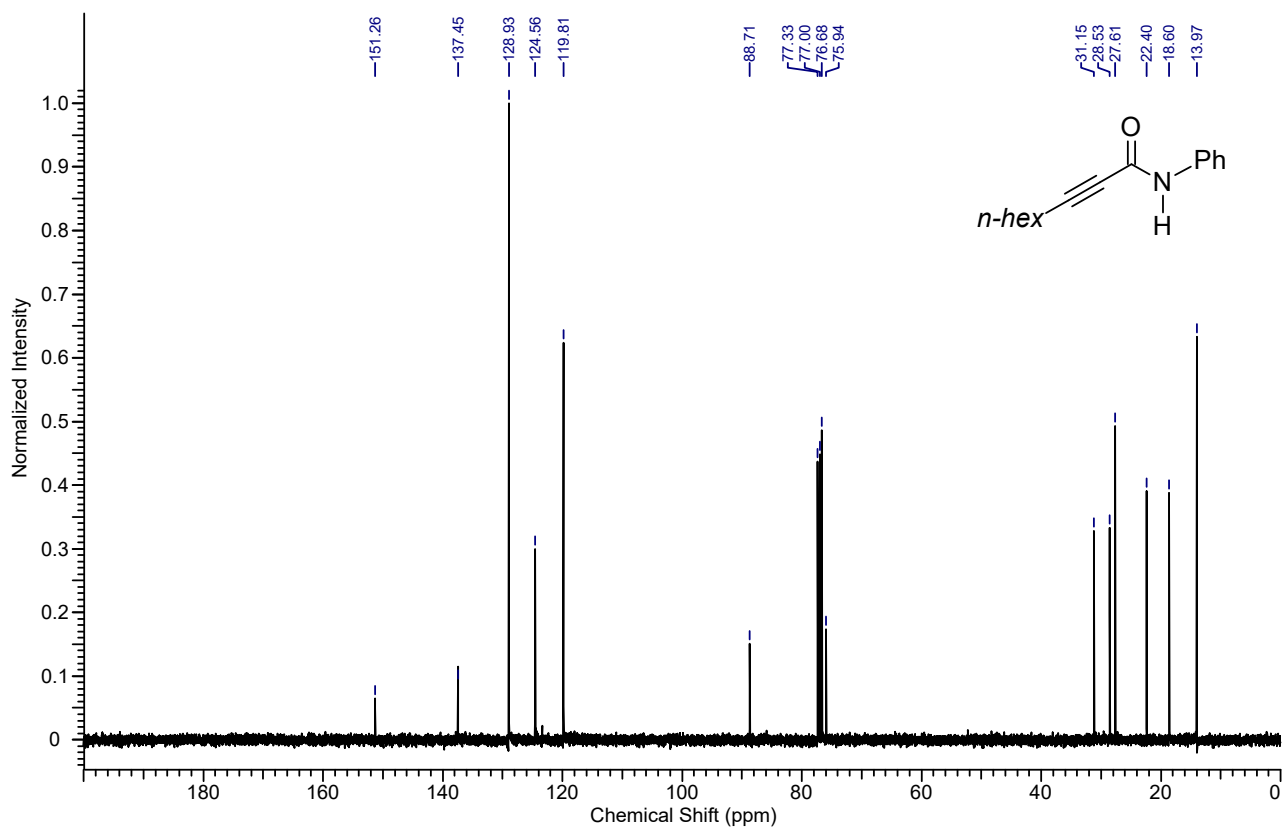

<sup>13</sup>C NMR spectrum of the compound 7a

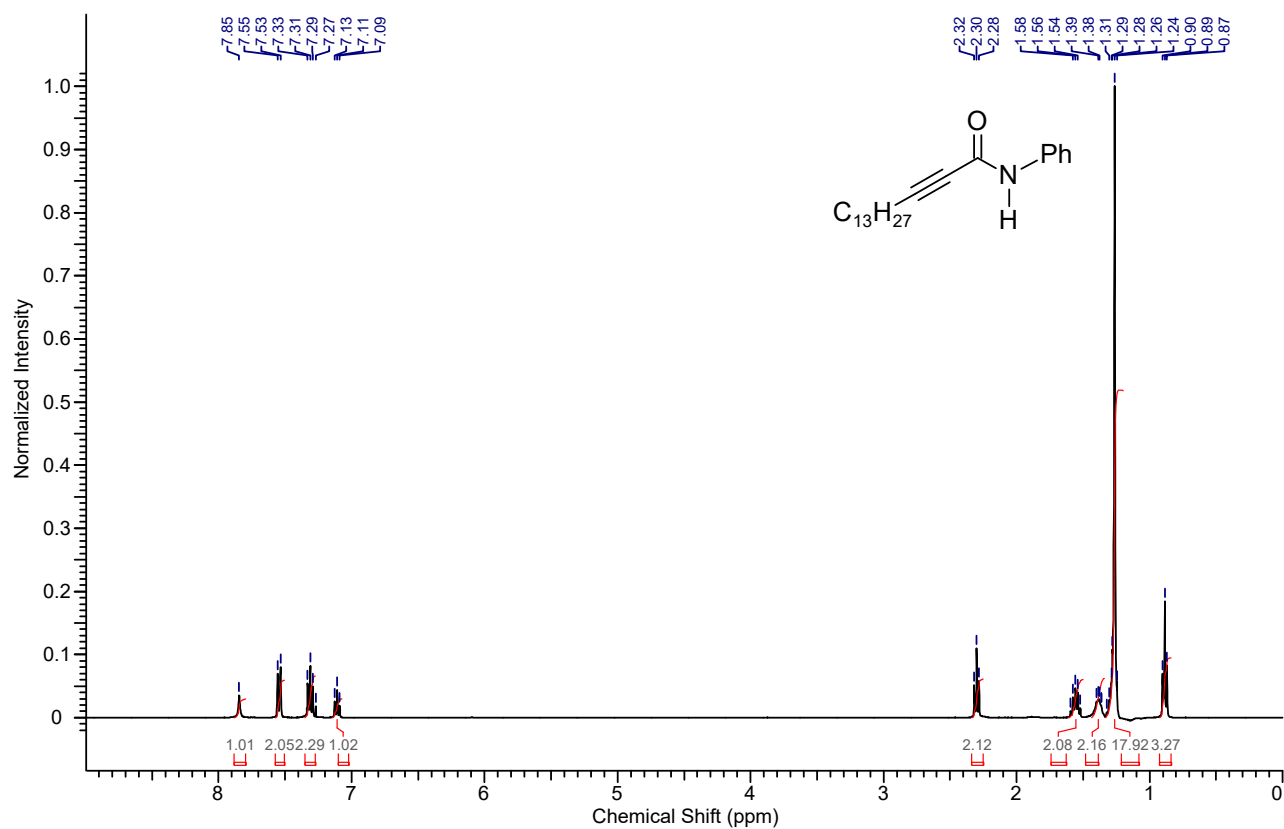

<sup>1</sup>H NMR spectrum of the compound **7b**

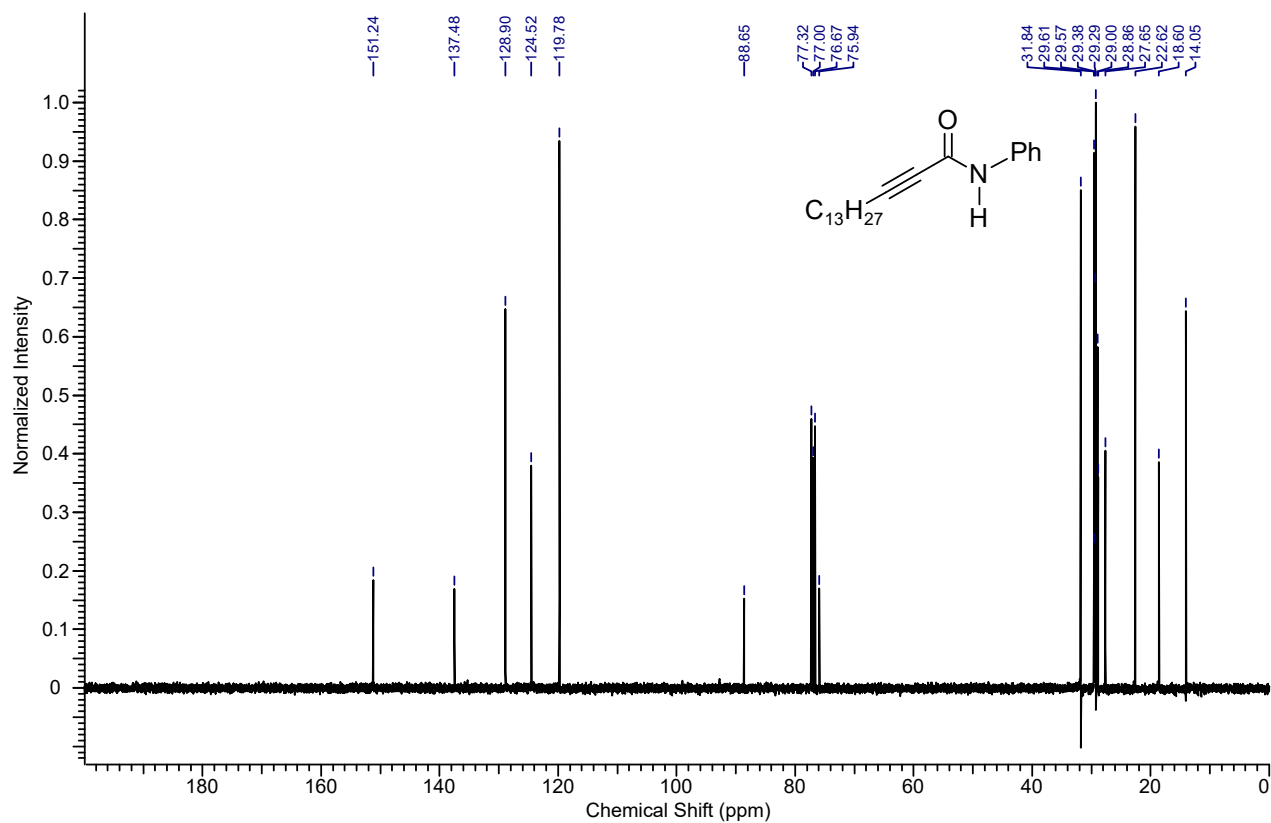

<sup>13</sup>C NMR spectrum of the compound **7b**

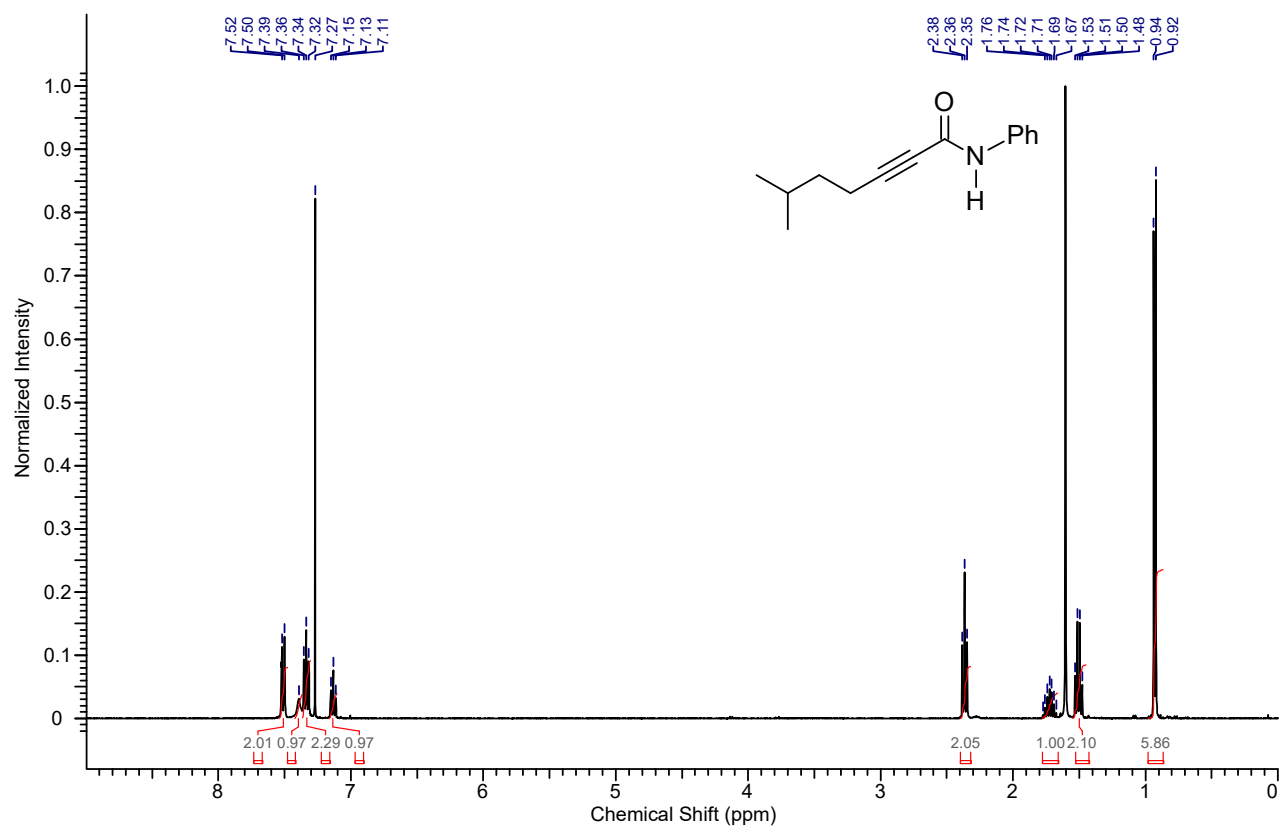

<sup>1</sup>H NMR spectrum of the compound 7c

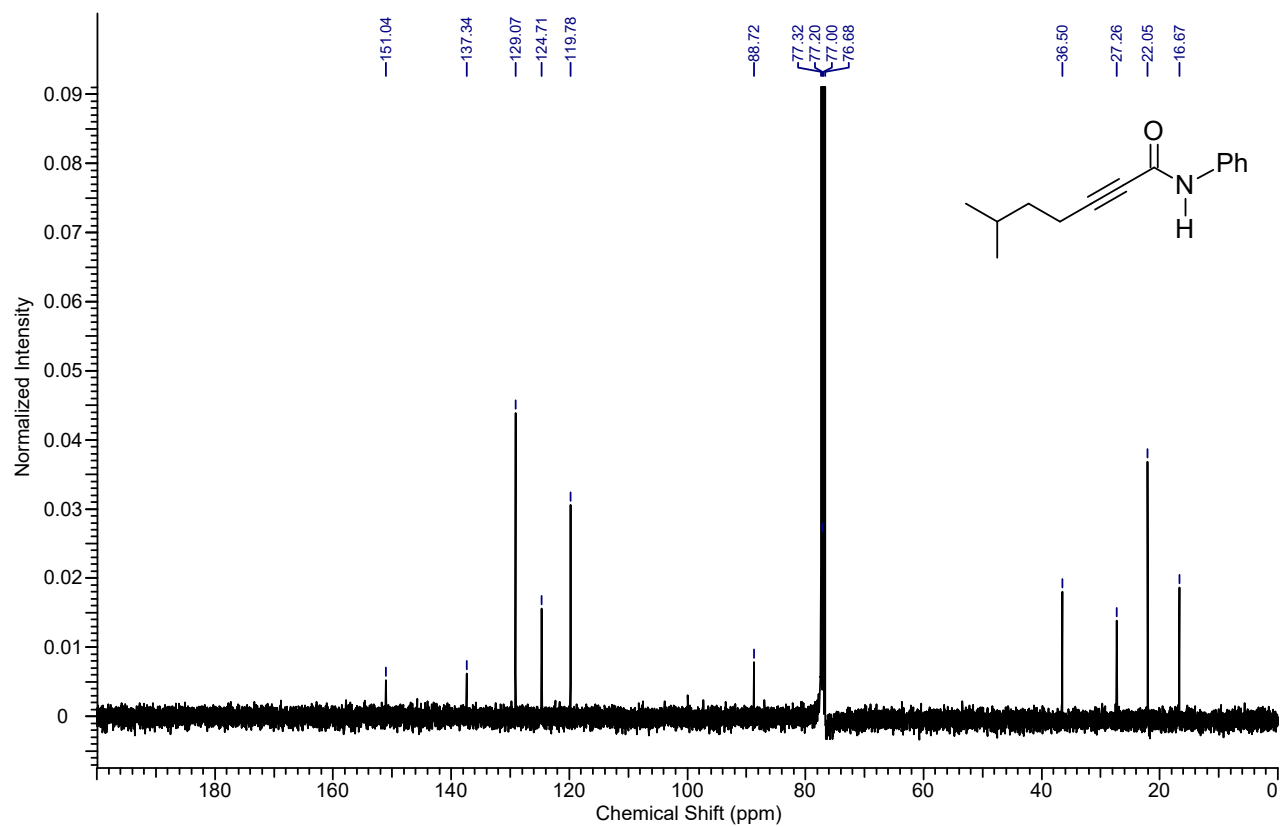

<sup>13</sup>C NMR spectrum of the compound 7c

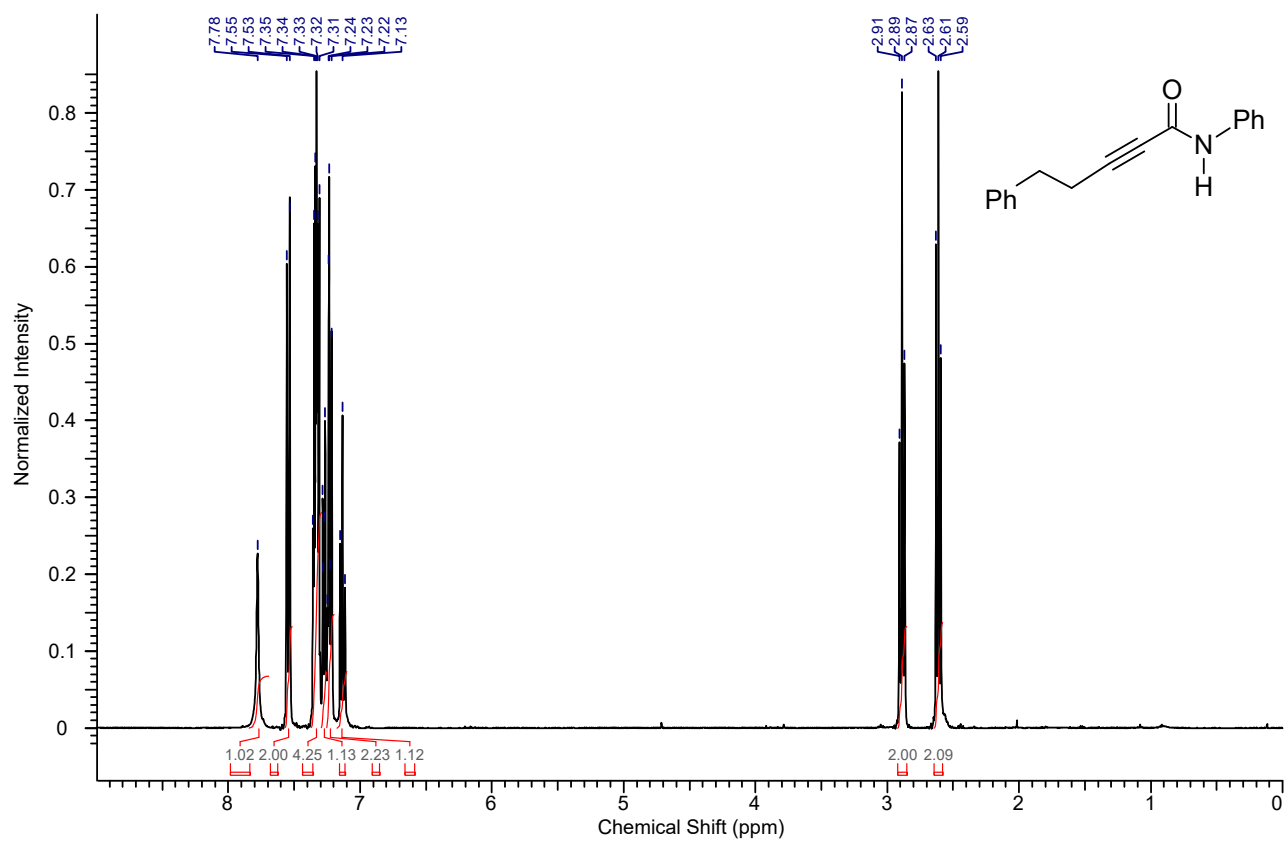

<sup>1</sup>H NMR spectrum of the compound 7d

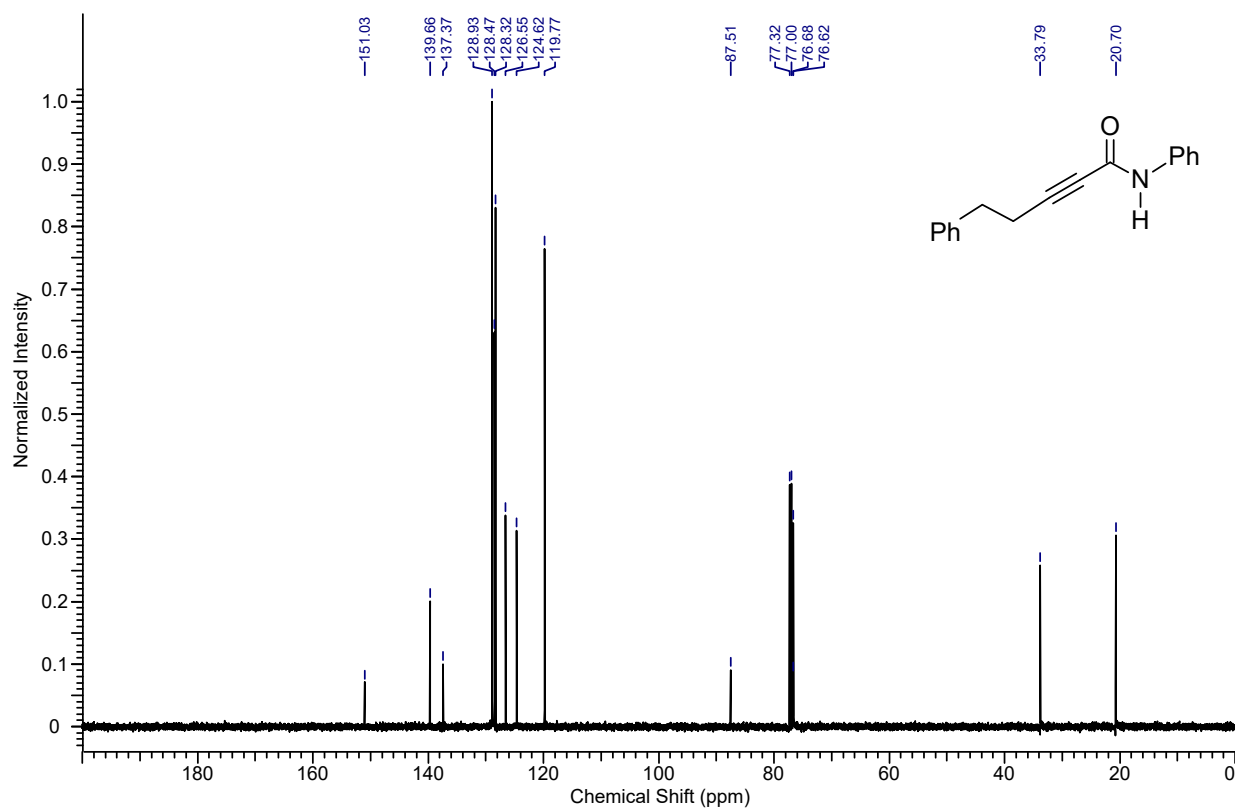

<sup>13</sup>C NMR spectrum of the compound 7d

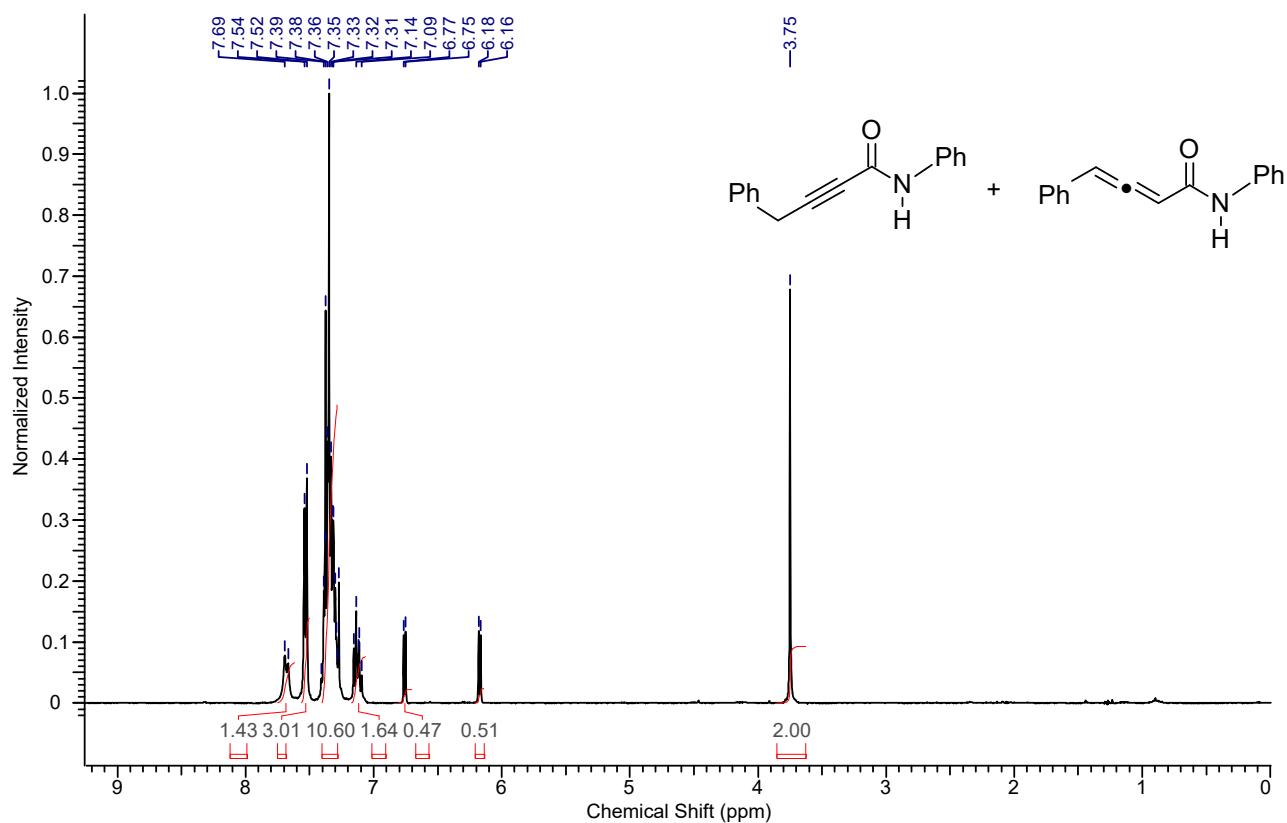

<sup>1</sup>H NMR spectrum of the compound **7e** (a 2:1 mixture of **7e** and **7ea**)

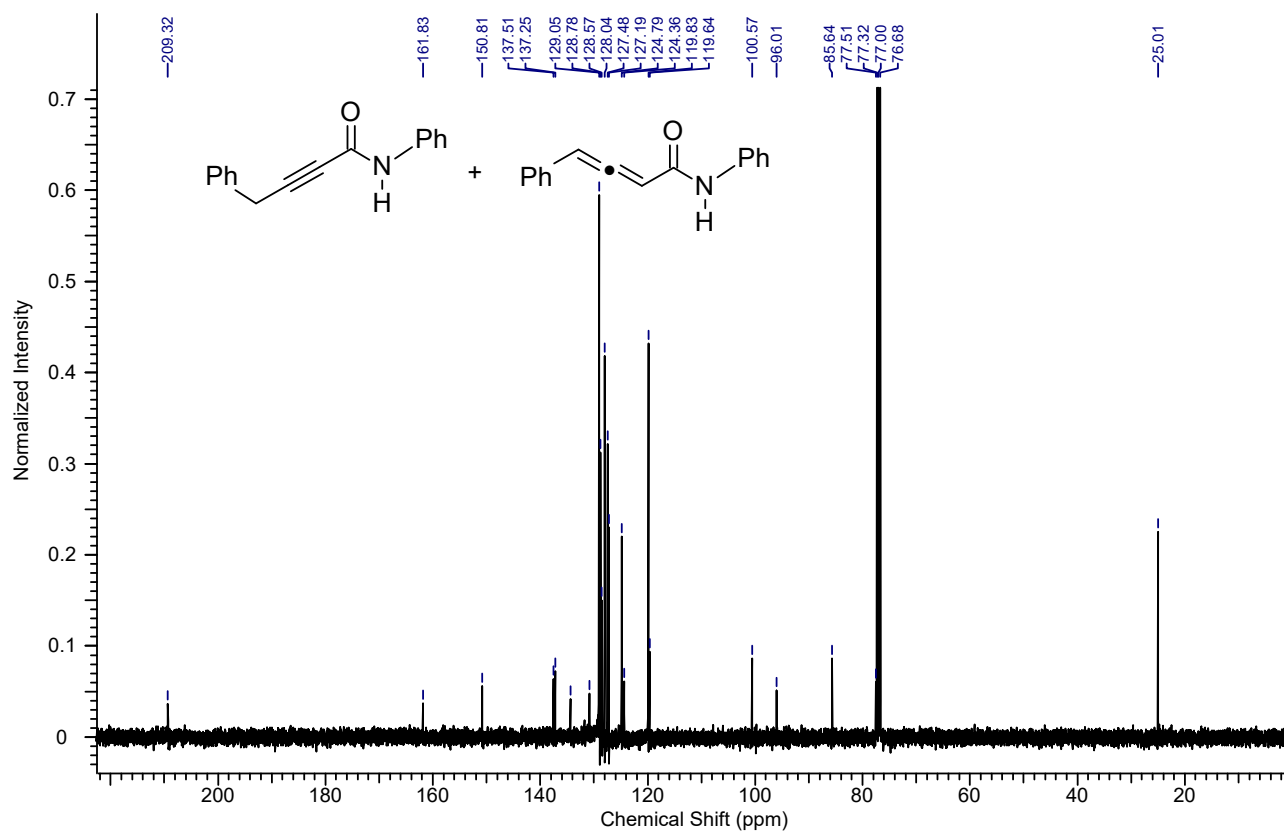

<sup>13</sup>C NMR spectrum of the compound **7e** (a 2:1 mixture of **7e** and **7ea**)

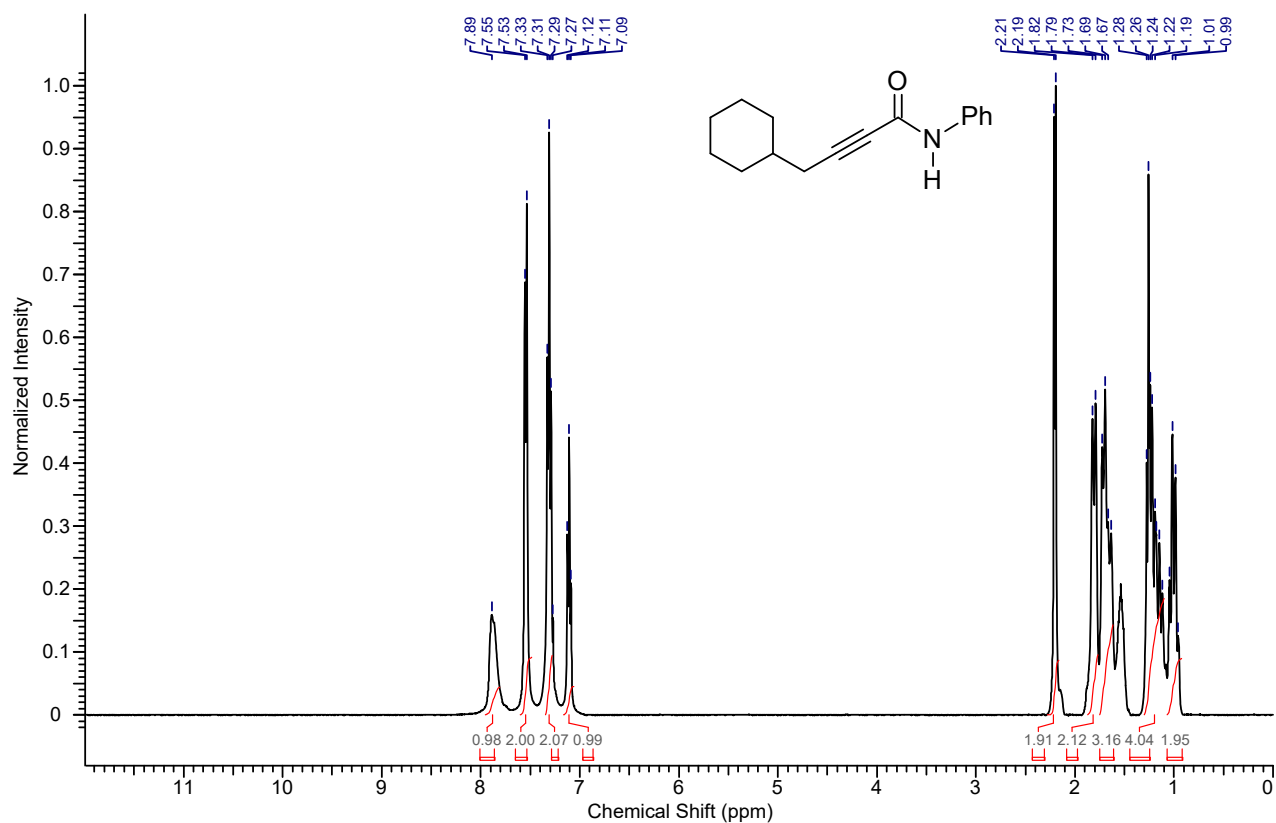

<sup>1</sup>H NMR spectrum of the compound 7f

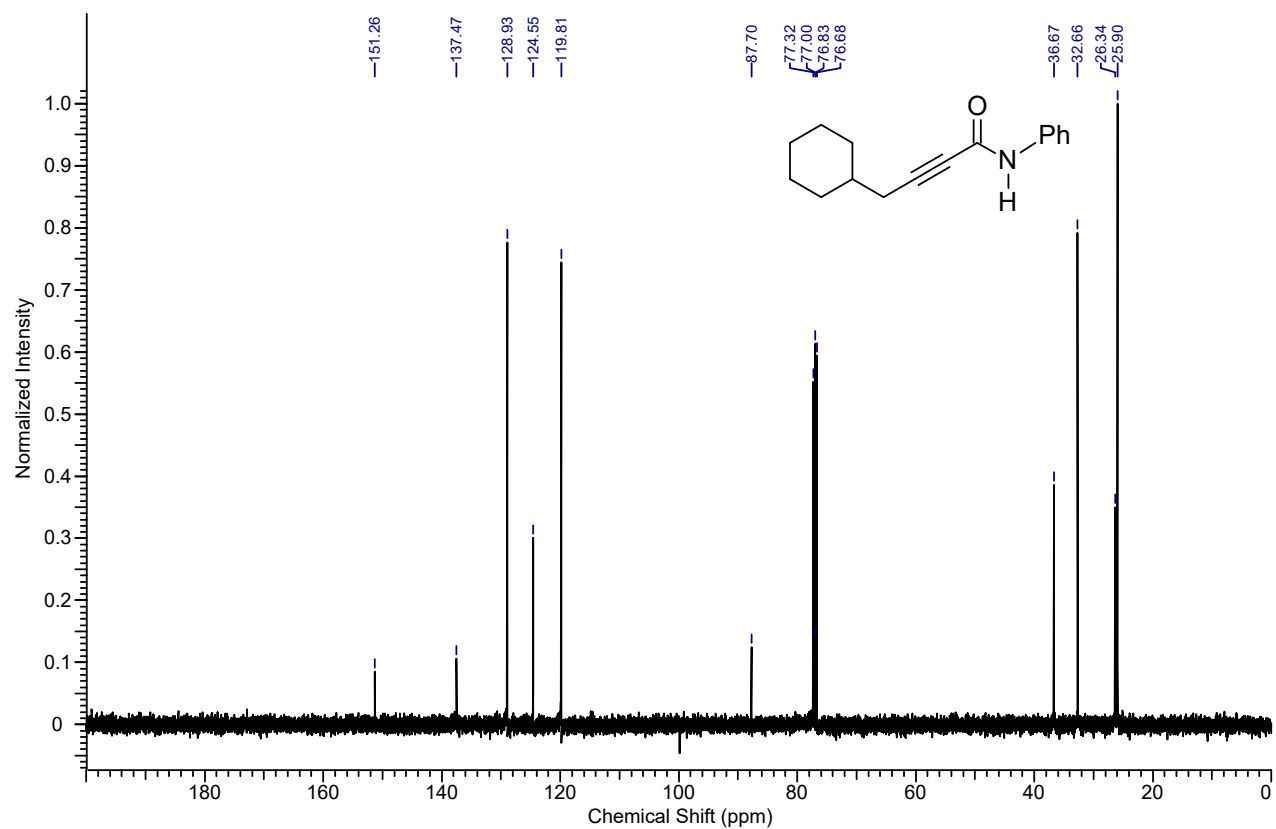

<sup>13</sup>C NMR spectrum of the compound 7f

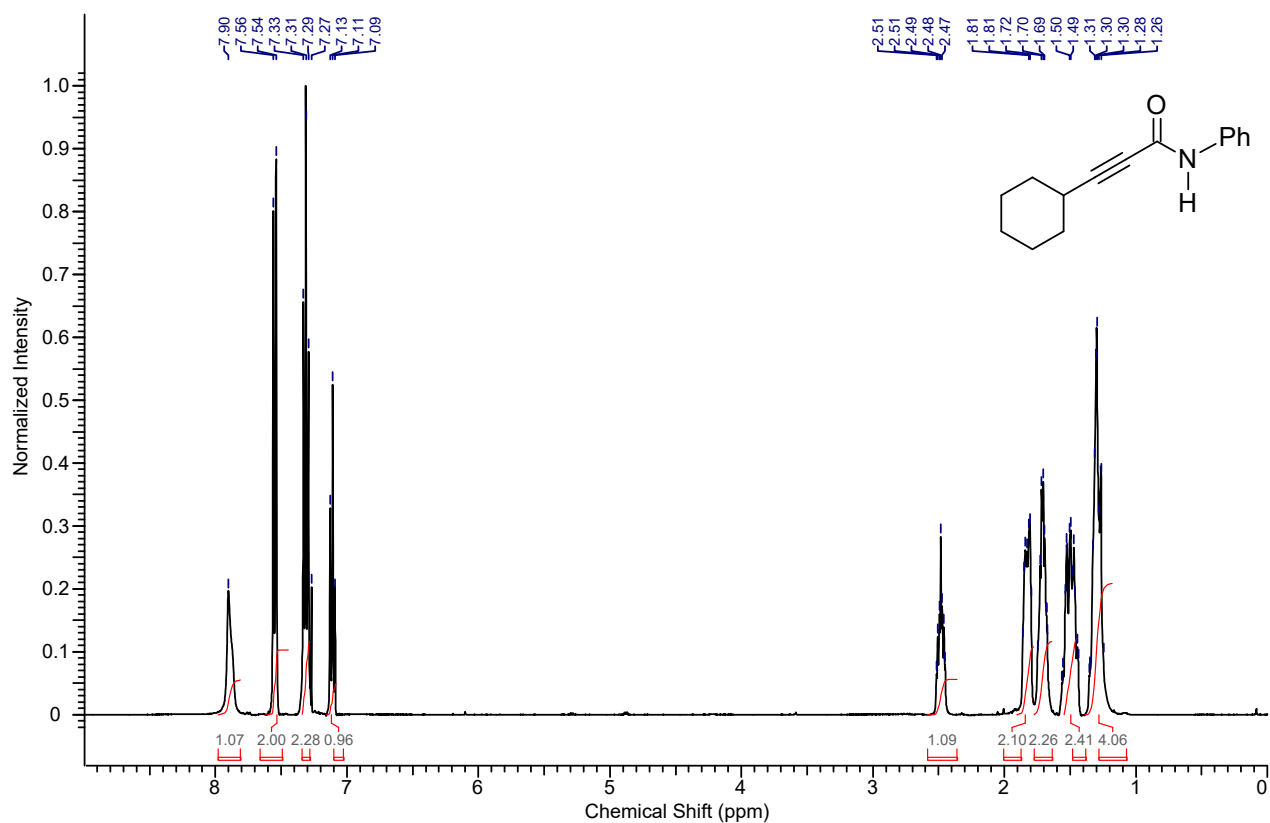

<sup>1</sup>H NMR spectrum of the compound 7g

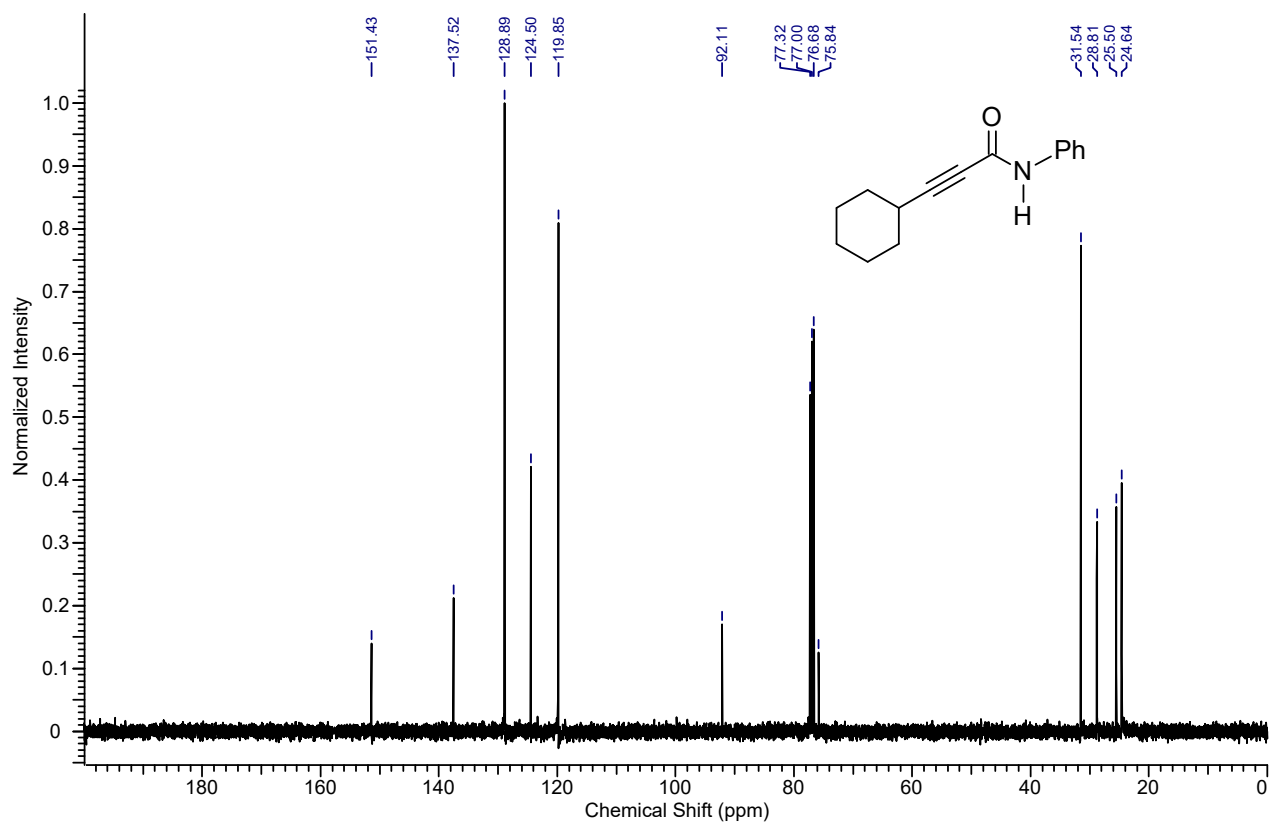

<sup>13</sup>C NMR spectrum of the compound 7g

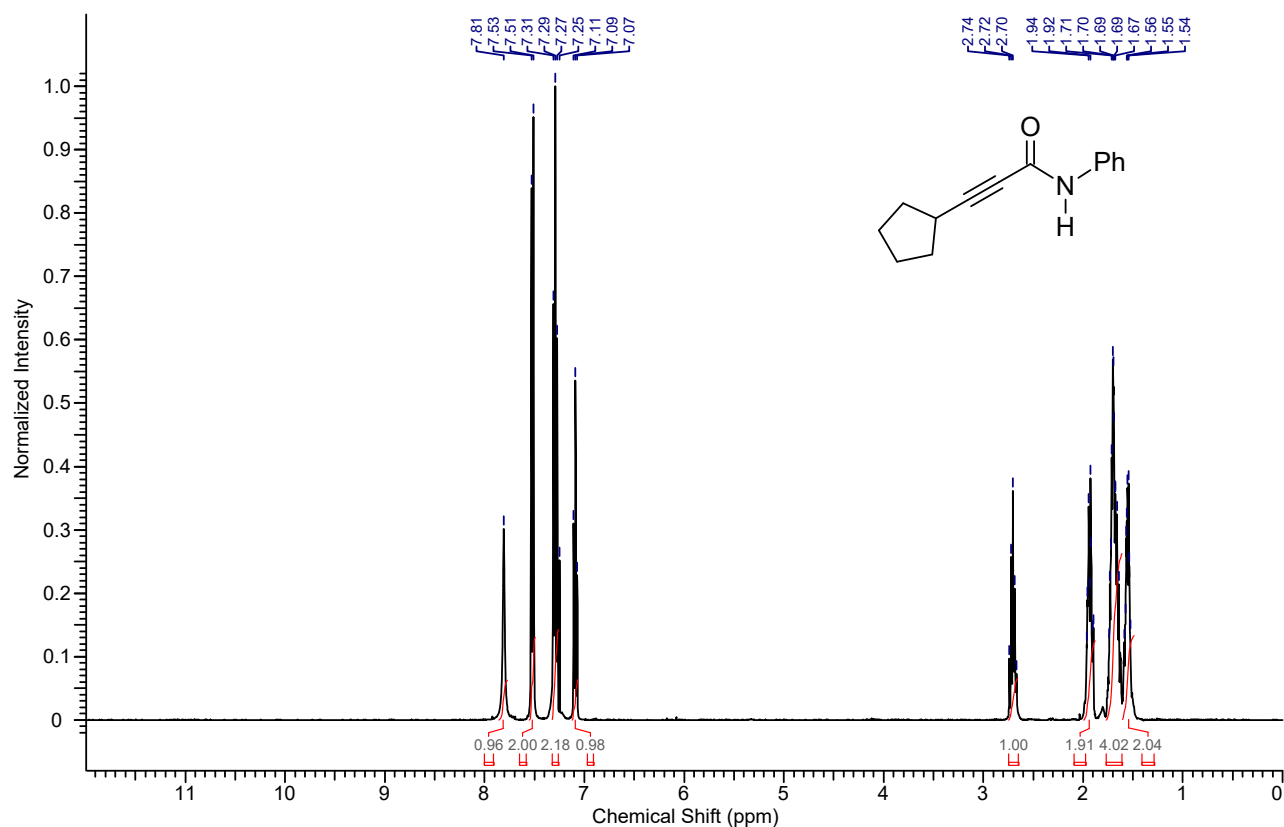

<sup>1</sup>H NMR spectrum of the compound 7h

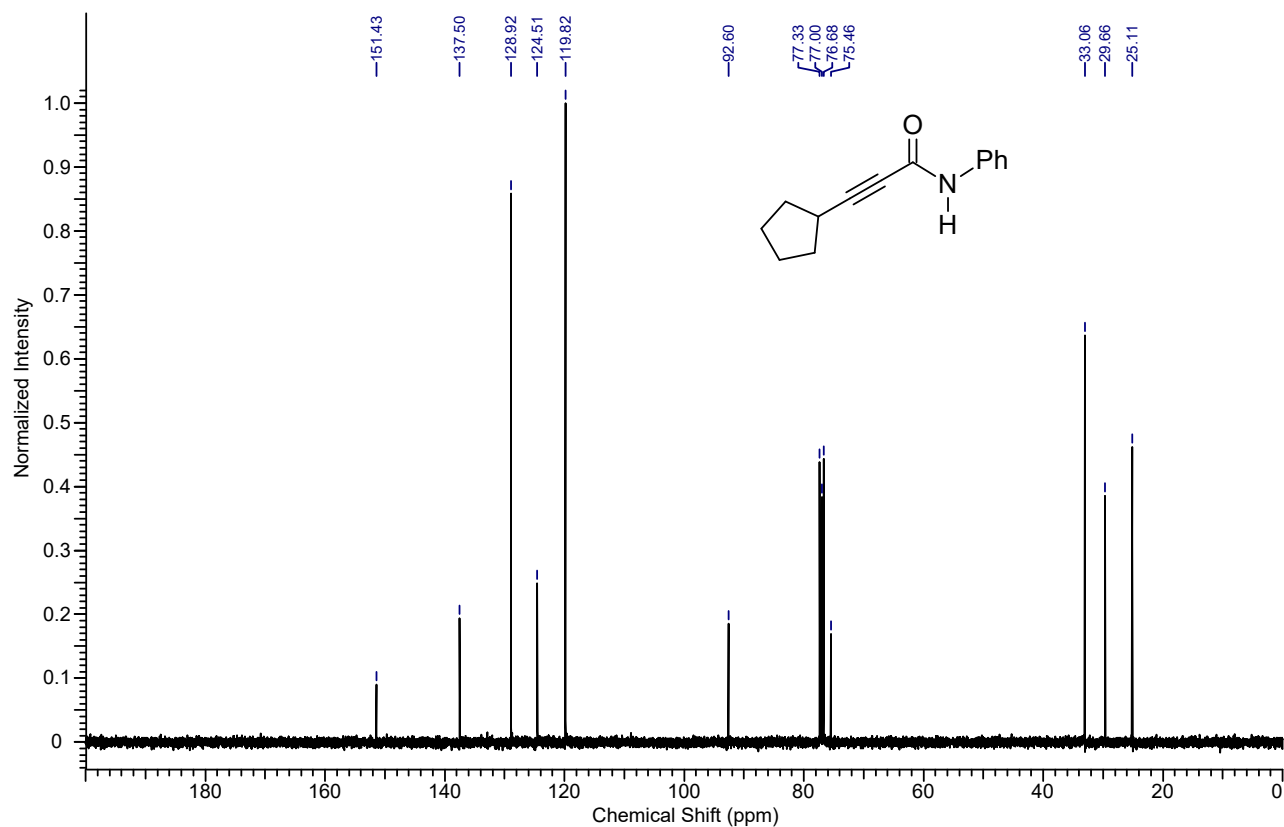

<sup>13</sup>C NMR spectrum of the compound 7h



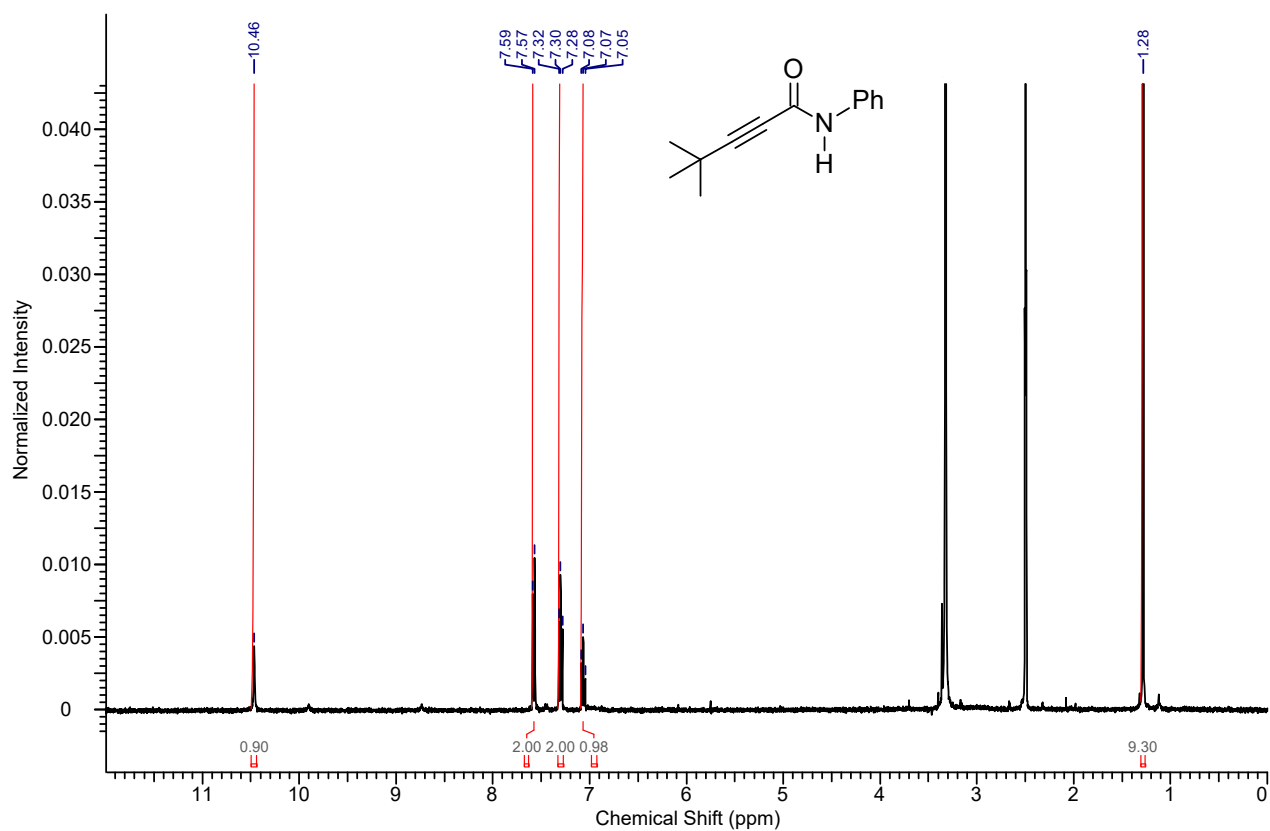

<sup>1</sup>H NMR spectrum of the compound **7i**

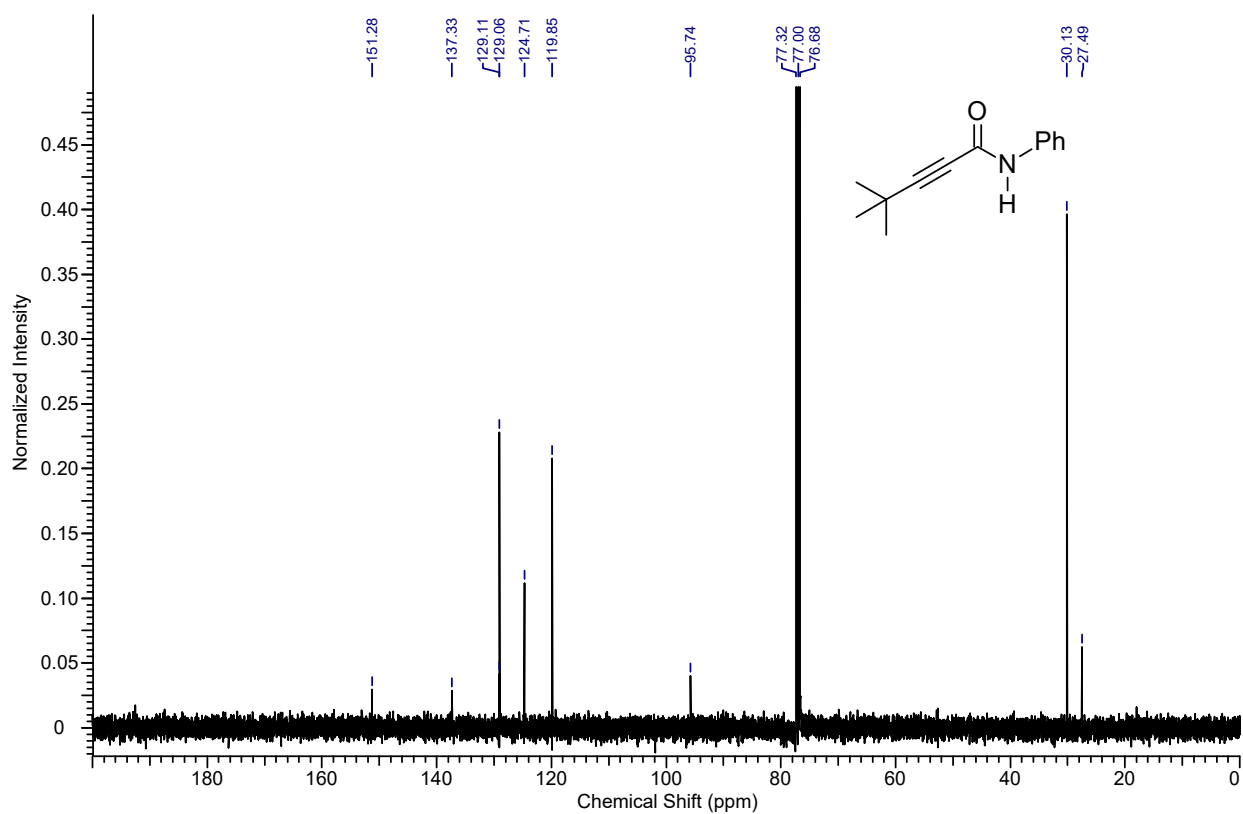

<sup>13</sup>C NMR spectrum of the compound **7i**

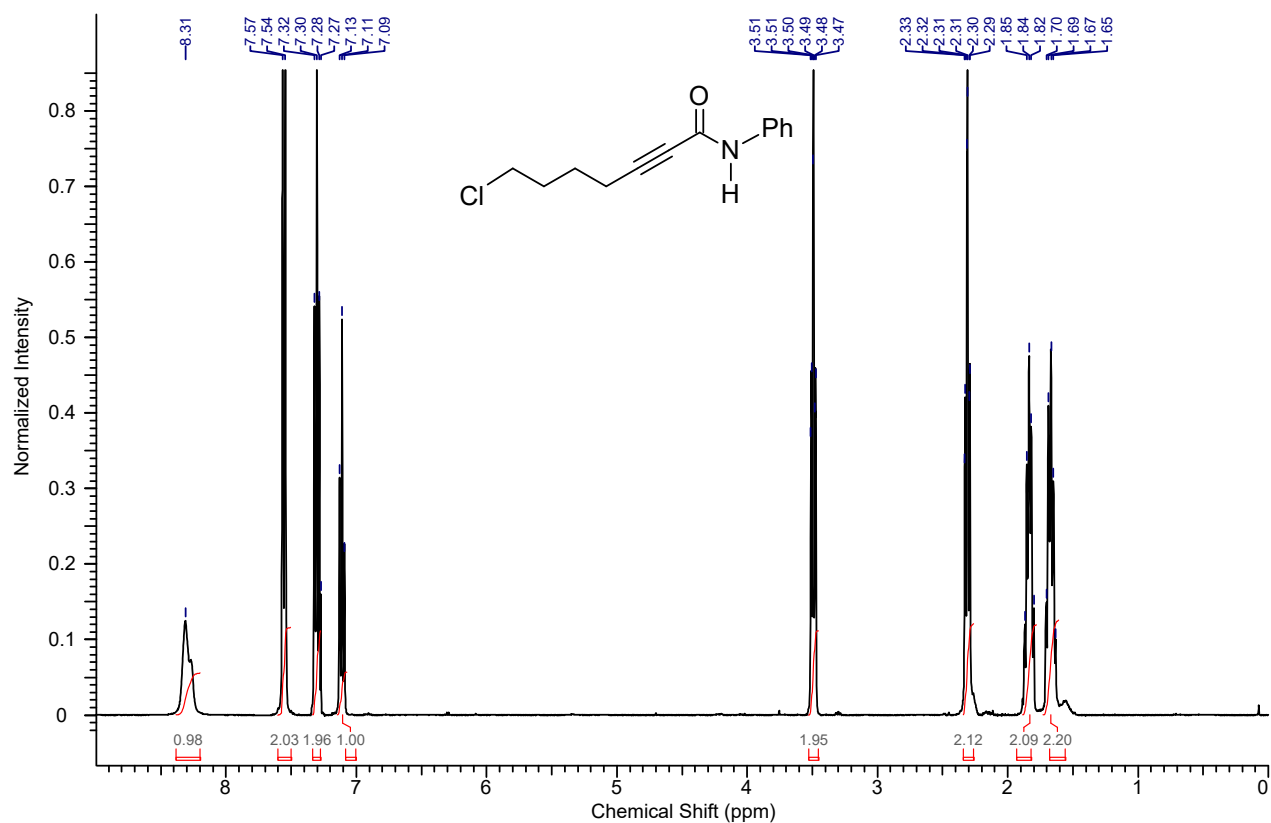

$^1\text{H}$  NMR spectrum of the compound **7j**

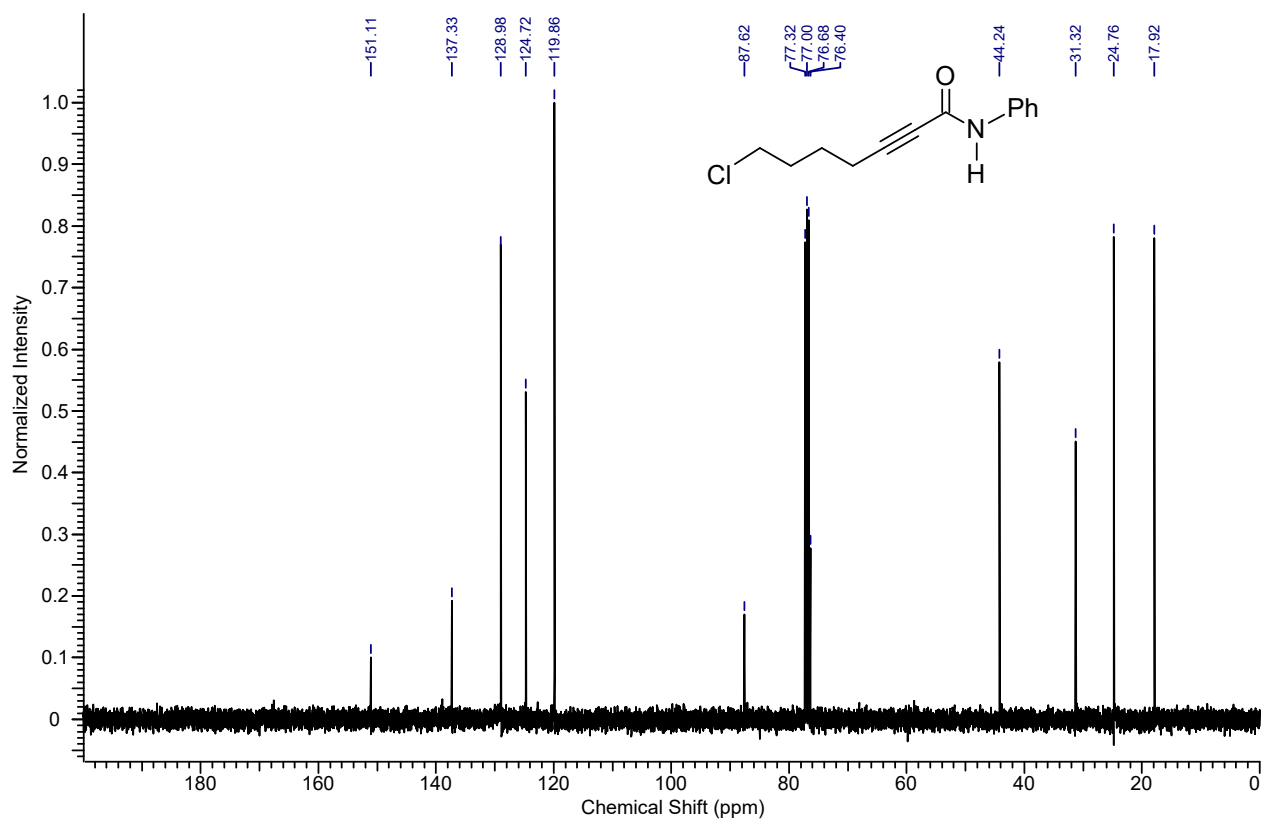

$^{13}\text{C}$  NMR spectrum of the compound **7j**

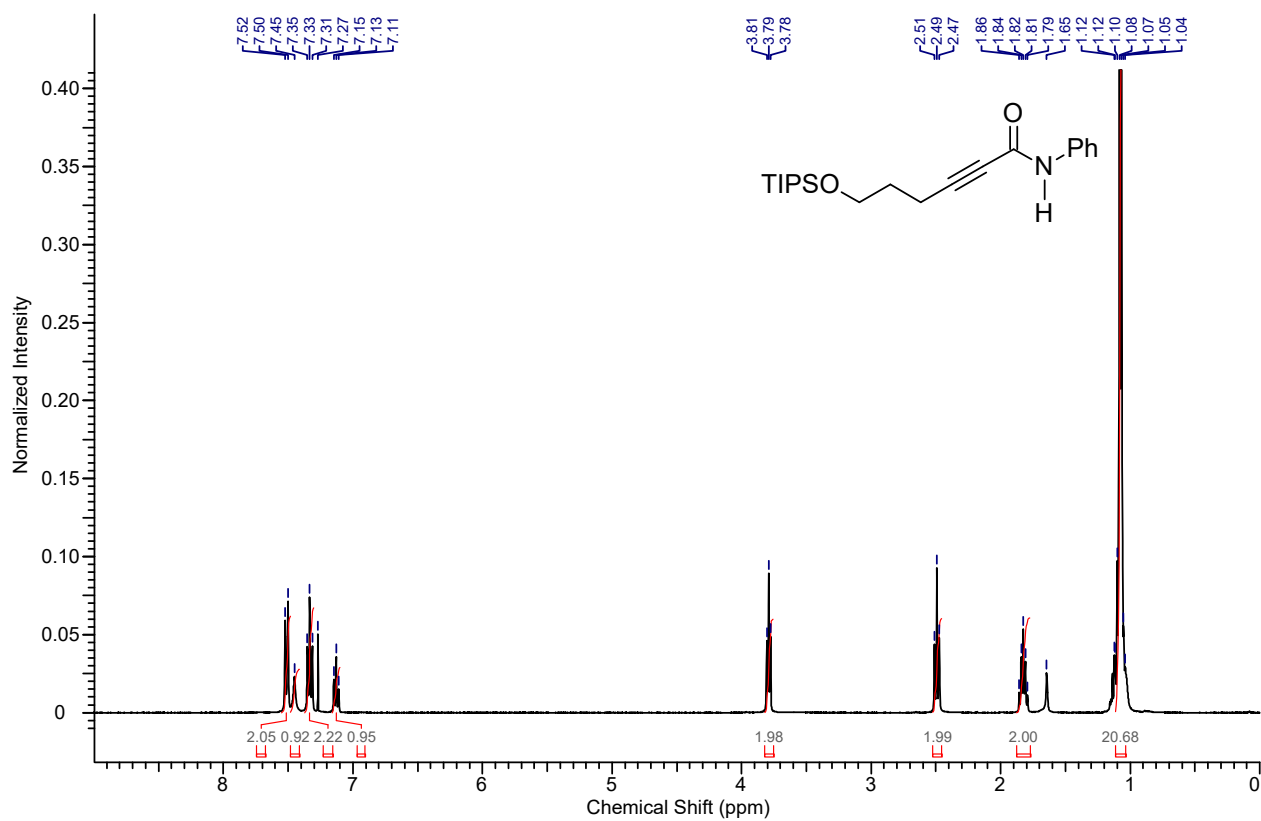

<sup>1</sup>H NMR spectrum of the compound 7k

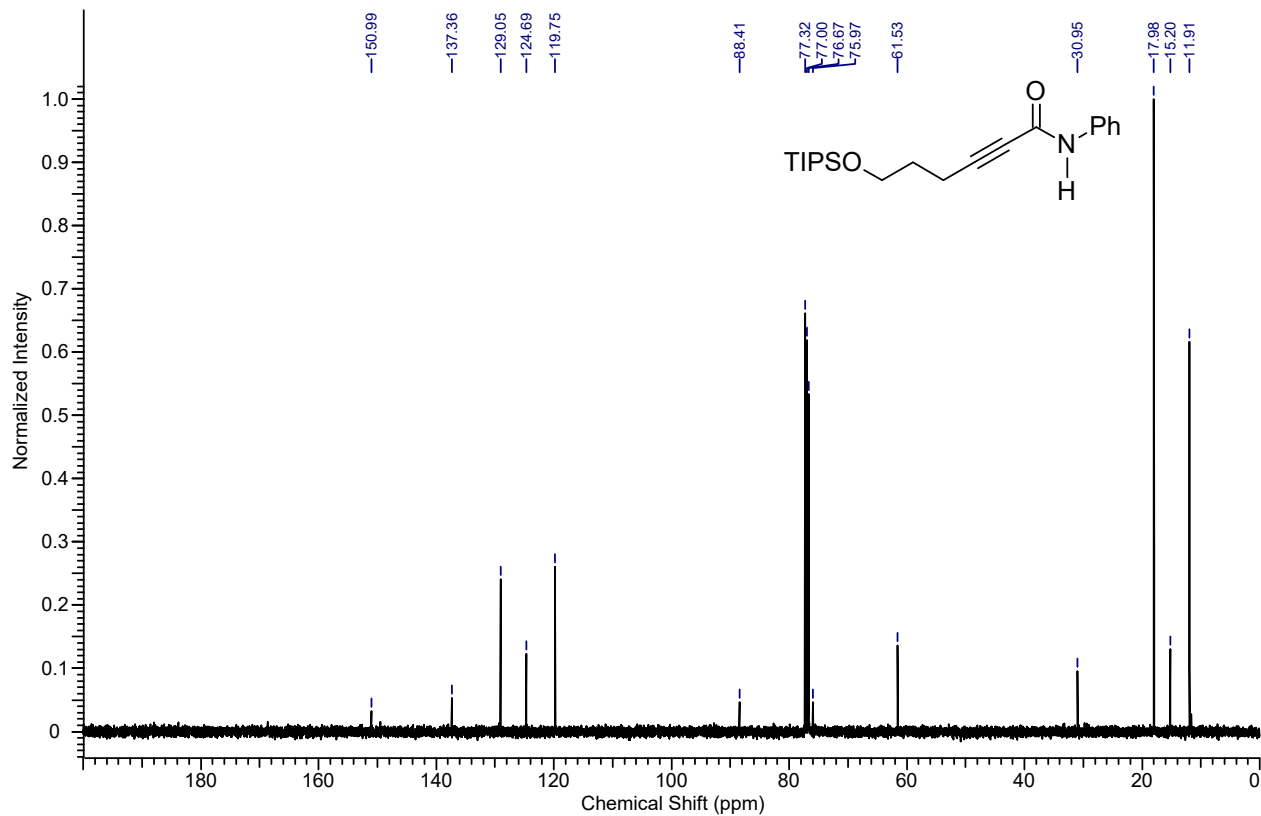

<sup>13</sup>C NMR spectrum of the compound 7k

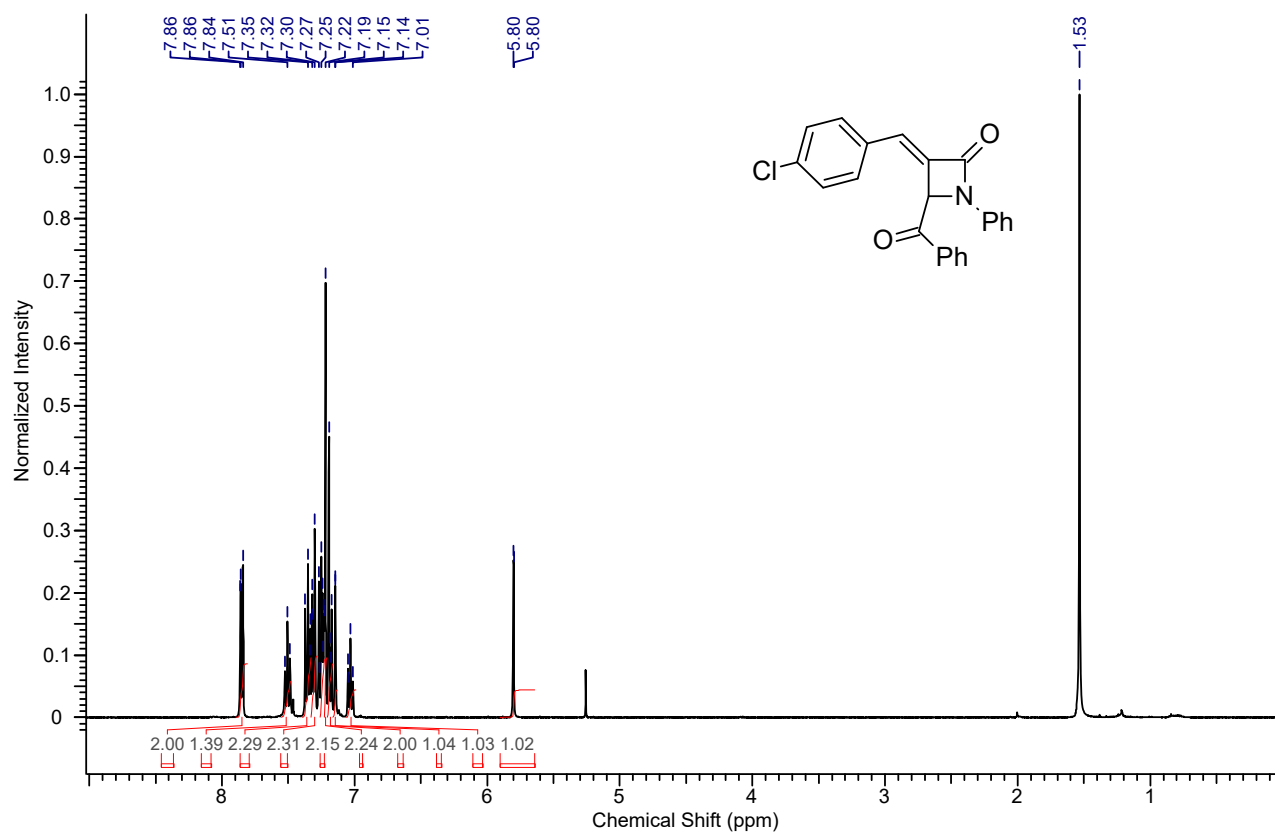

<sup>1</sup>H NMR spectrum of the compound 9a

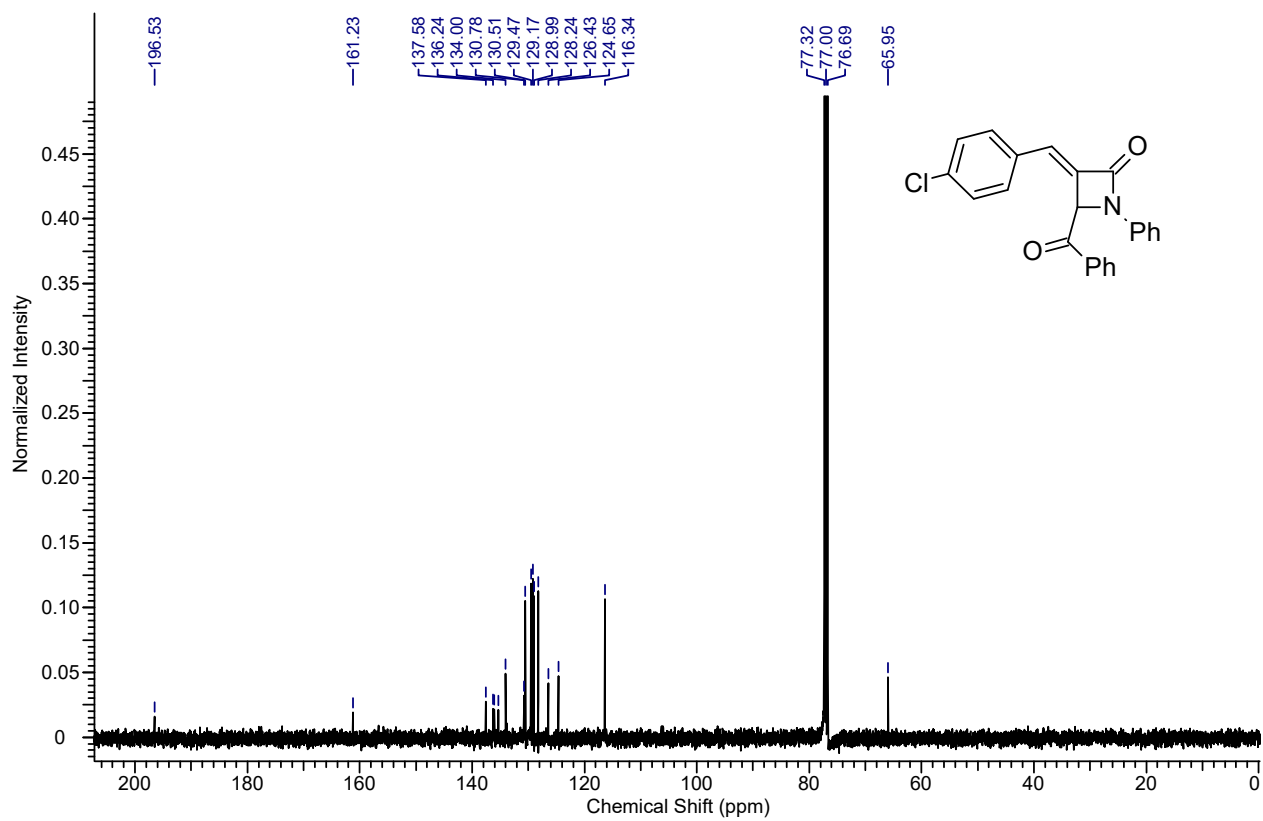

<sup>13</sup>C NMR spectrum of the compound 9a

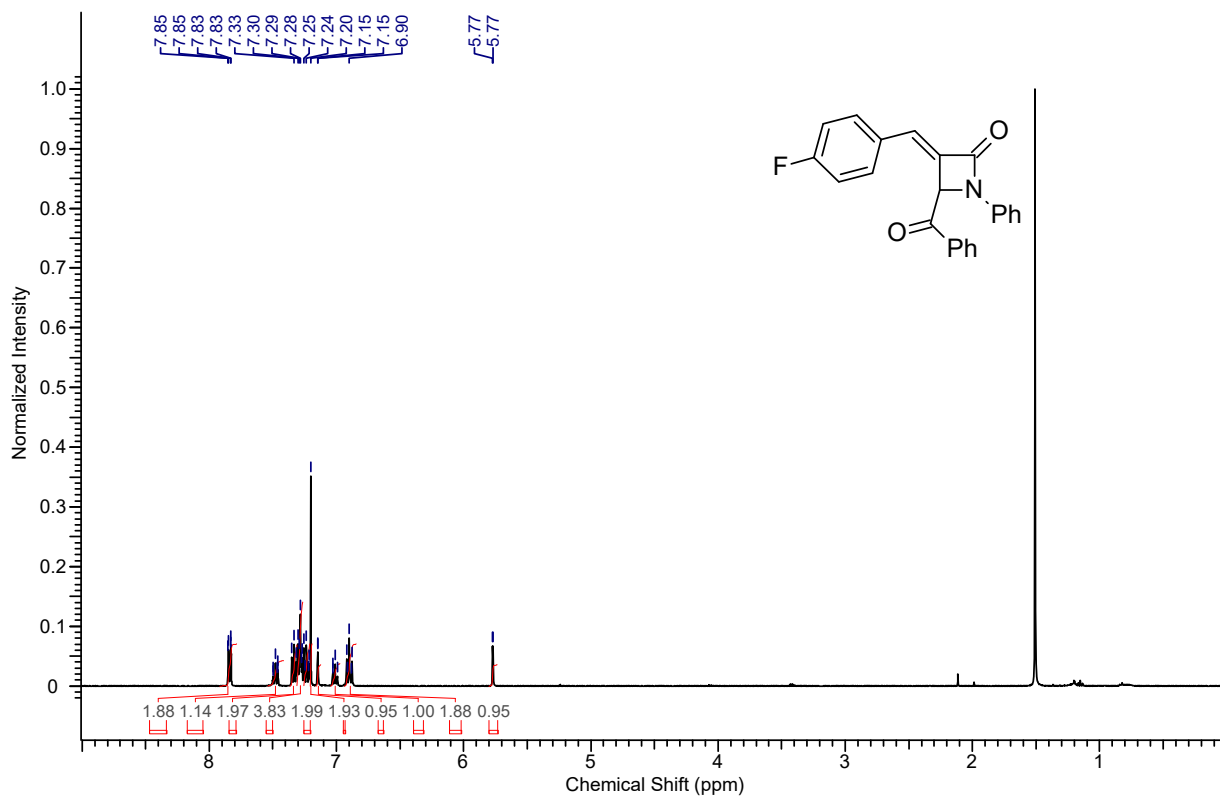

**<sup>1</sup>H NMR spectrum of the compound **9b****

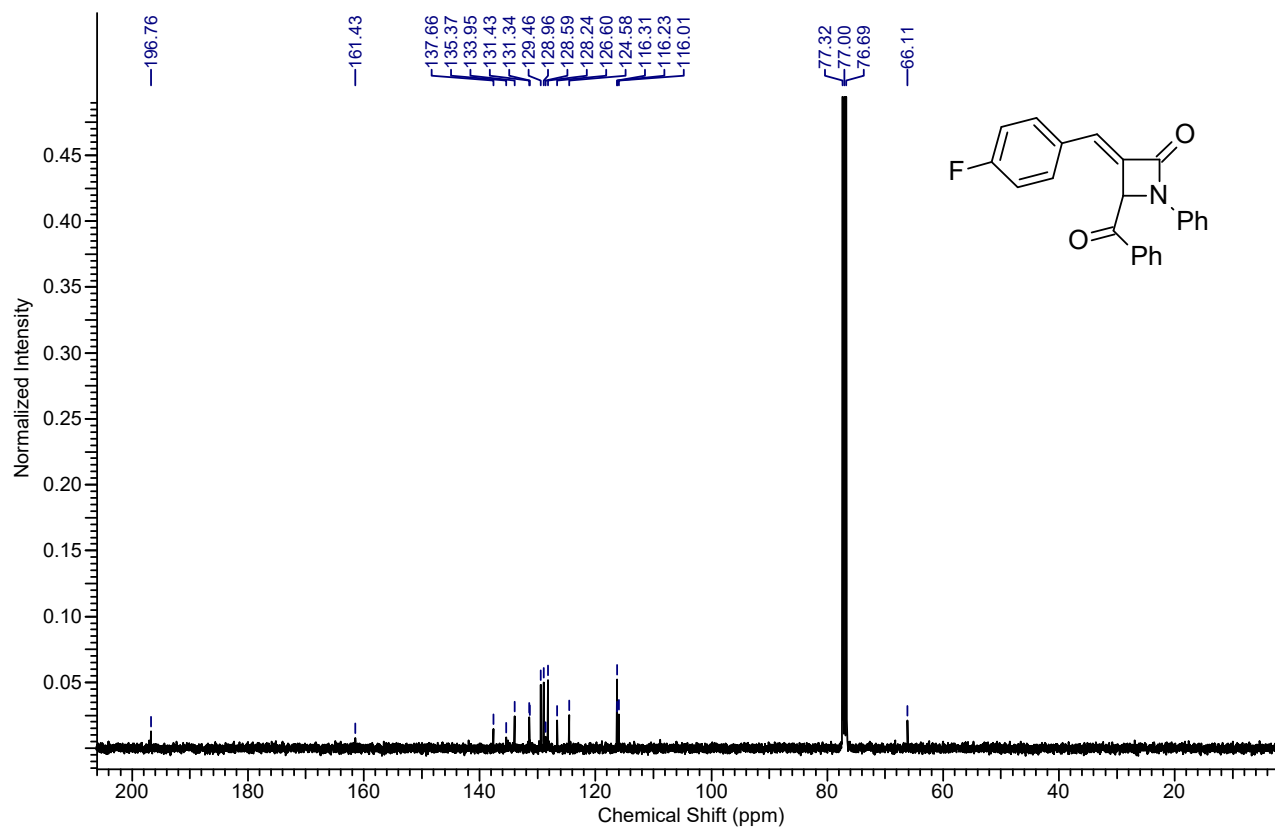

**<sup>13</sup>C NMR spectrum of the compound **9b****

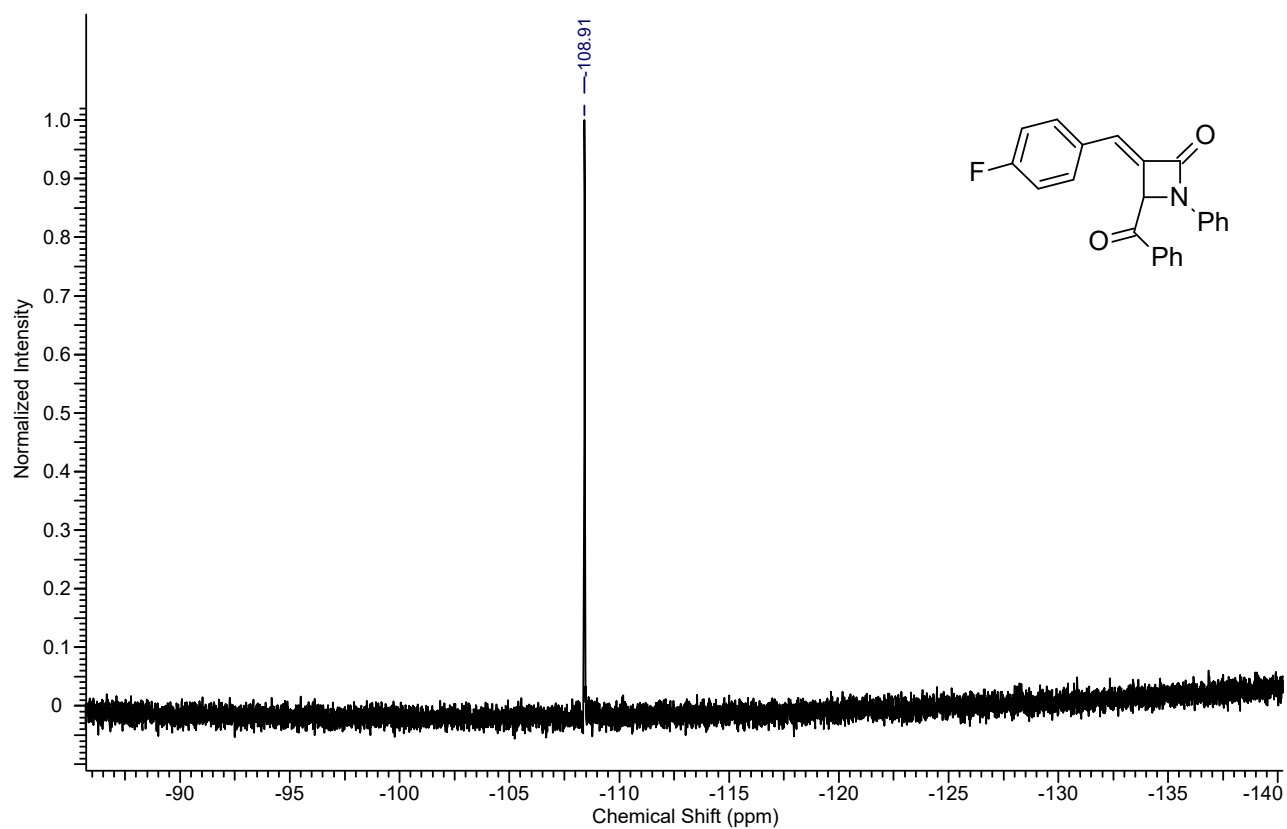

<sup>19</sup>F NMR spectrum of the compound **9b**

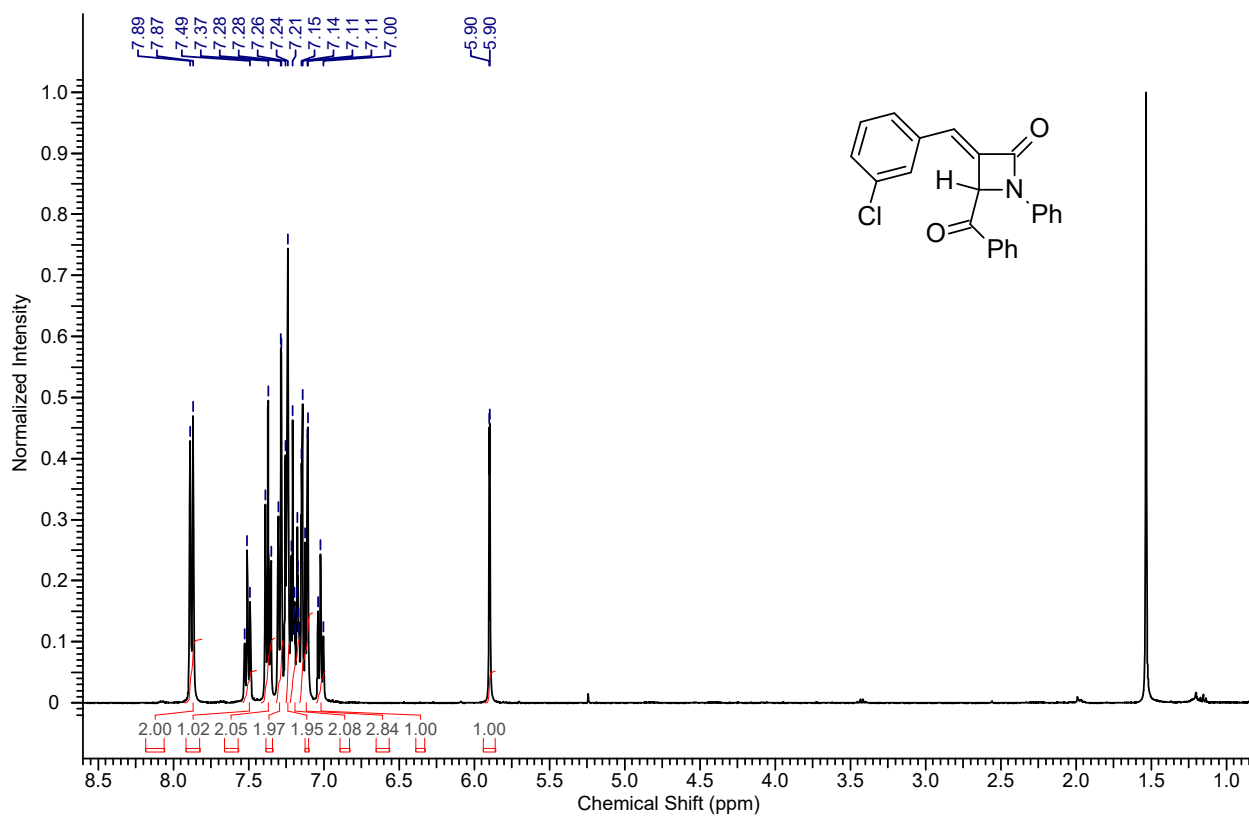

<sup>1</sup>H NMR spectrum of the compound **9c**

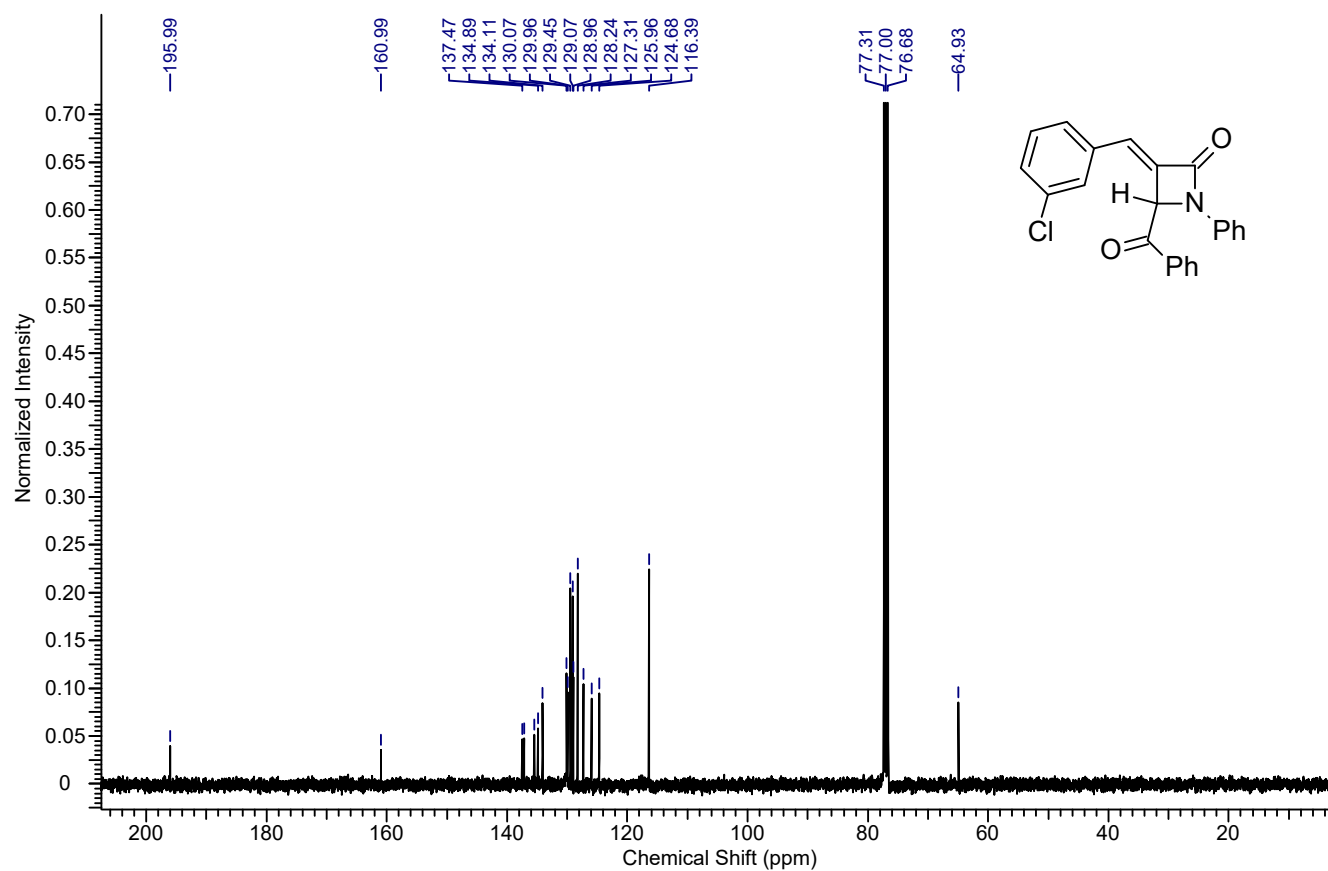

$^{13}\text{C}$  NMR spectrum of the compound **9c**
